# Supplementary material for: Anion-assisted supramolecular polymerization of luminescent organic π-conjugated chromophores in a moderately polar solvent: tunable nanostructures and their corresponding effects on electronic properties
Source: Royal Society of Chemistry journal article supplement (doi:10.1039/d3nr04090a), 2023-01-01
Supplement: d3nr04090a1.pdf [file d3nr04090a1.pdf]

## Supporting Information for

### **Anion-Assisted Supramolecular Polymerization of Luminescent Organic $\pi$ -Conjugated Chromophore in Moderately Polar Solvent: Tunable Nanostructures and Corresponding Effect on Electronic Property**

Sk Mursed Ali, Sujauddin Sk, Ankita Sengupta, Subrata Santra, Souvik Barman, Nayim Sepay and Mijanur Rahaman Molla\*

**Materials and Methods:** All the reagents were purchased from commercial source and used as such without further purification.  $^1\text{H}$  NMR spectra were recorded on a Bruker DPX-300 MHz and 400 MHz NMR spectrometer and all the spectra were calibrated against TMS. UV-Vis spectra were recorded in a Labtronics LT-291 UV/Vis spectrophotometer. MASS spectra were recorded on using Qtof Micro YA263 mass spectrometer. TEM, SEM and AFM images were recorded on using a 200 KV Transmission Electron Microscope (MODEL: JEOL JEM 2100 HR with EELS), JEOL Scanning Microscope-JSM-6700F and Bruker Innova-S2 instrument in the tapping mode respectively. Fluorescence spectra were recorded on HORIBA scientific Fluoromax-4 fluorescence spectrophotometer. Cyclic voltammetry was recorded on CH Instrument (MODEL: CHI600E, Electrochemical Analyzer) and current - voltage measurements were recorded on Keithley 2611B source meter.

**UV-visible spectroscopic studies:** For fluoride variable experiment, Stock solution of NMI-2 (1.0 mM) was prepared in THF solvent and kept it to equilibrate at room temperature for 2h. Then, an aliquot (100  $\mu\text{l}$ ) was taken from stock solution and diluted to the final concentration at 0.1 mM. Then solutions were allowed to equilibrate at room temperature for 1 h before spectral measurements were carried out.

To prepare 1 Equivalent TBAF to NMI (NMI.1F), 0.1 microliter of 1(M) TBAF solution was added in 1ml of 0.1mM THF solution of NMI-2. Here the final concentration of both TBAF and NMI is 0.1 mM. Hence, the solution contains 1 equivalent NMI and 1 equivalent TBAF.

The ratio of NMI and TBAF = 1:1. Similarly, for 5 (NMI:TBAF = 1:5), 10 (NMI:TBAF = 1:10), 25 (NMI:TBAF = 1:25) and 50 (NMI:TBAF = 1:50) equivalents of TBAF the individual concentration was maintained accordingly.

For  $\text{BF}_3$  addition experiment, 50 equiv of TBAF was added in THF solution of NMI-2 (0.1 mM) and then the solution was equilibrated at room temperature for 1 h. Next, the spectra were recorded with the gradual addition of  $\text{BF}_3$  to the NMI:50F<sup>-</sup> solution. Exactly the similar procedure was followed for methanol addition experiment.

**FT-IR Characterization:** At first the sample was mixed with KBr to make a pellet, then it was placed in the chamber inside the instrument and spectrum was recorded at room temperature.

**Job's plot to determine the binding ratio:** At first nine sets of Sample solution (1 ml) containing NMI-2 and TBAF were prepared with varying the mole fraction of NMI-2 or TBAF from 0.1 to 0.9, but the final concentration of all the solution was maintained at 1 mM. The solutions were allowed to equilibrate at room temperature for 1 h and then the UV-vis spectral data were recorded at room temperature.

**Atomic Force Microscopic (AFM) Experiment:** In a typical AFM experiment, 20  $\mu\text{l}$  of NMI.F<sup>-</sup> adducts in variable ratio of NMI and F<sup>-</sup> (concentration = 0.1 mM) were placed on a microscopic cover glass and allowed to air dry overnight before the images were taken.

**Time Correlated Single Photon Counting (TCSPC) experiment:** In a typical experiment, 0.5 mM solutions of NMI.F<sup>-</sup> adducts in variable ratio of NMI and F<sup>-</sup> were used for the measurement. Samples were excited at 420 nm and emissions were monitored at 515 nm for all the solution.

**Measurement of Fluorescence quantum yield:** Fluorescence quantum yield at room temperature was estimated at a single excitation wavelength (420 nm) using quinine sulphate

in Sulfuric acid (0.1M) aqueous solution ( $\Phi = 0.546$ ) as the reference according to the equation:

$$\Phi_X = \Phi_{ST}[\text{Grad}_X/\text{Grad}_{ST}] [\eta^2_X/\eta^2_{ST}].$$

Where the subscripts ST and X indicate standard and test, respectively,  $\Phi$  is the fluorescence quantum yield, Grad is the gradient from the plot of integrated fluorescence intensity vs. absorbance and  $\eta$  the refractive index of the solvent.

In this method, the average quantum yields of NMI-2, NMI-2 with 0.5 equiv. TBAF and NMI-2 with 50 equiv. TBAF in THF were estimated to be 0.48, 0.44 and 0.15 respectively.

**Electrochemical measurements:** Cyclic voltammetry of fluoride variable NMI-2 was performed in THF solvent (concentration = 1.0 mM) at a scan rate  $100 \text{ mVs}^{-1}$  using Tetra-n-butylammonium perchlorate as a supporting electrolyte. A three-electrode cell consisting of a glassy carbon working electrode, a platinum wire as the counter electrode and Ag/AgCl was used as pseudo reference electrode. Reference electrode was ferrocene/ferrocenium couple ( $E_{\text{Fc}/\text{Fc}^+} = 0.40\text{V}$ ). The HOMO and LUMO energy levels were calculated using following equations.

$$E_{\text{HOMO}} = - (E_{\text{Ox onset}} - E_{\text{Fc}/\text{Fc}^+ \text{onset}}) - 4.80 \text{ eV.}$$

$$E_{\text{LUMO}} = - (E_{\text{Red onset}} - E_{\text{Fc}/\text{Fc}^+ \text{onset}}) - 4.80 \text{ eV.}$$

$$E_{\text{gap}} = E_{\text{LUMO}} - E_{\text{HOMO}}.$$

For Current – voltage measurements, fluoride variable NMI-2 solution (concentration = 1.0 mM) was spin coated on microscopic glass slide and kept under vacuum overnight. Silver paste was used at connection points. The conductivity(G) was measured using the following equation.

$$G = (1/R)[\ln 2/(\pi t)].$$

Where  $t$  is the film thickness measured by digital micrometer (average film thickness 42 micrometer).

**Synthesis of the Napthalimide Derivative (NMI-2):** The synthetic procedure of NMI-2 is outlined below:

**Compound NMI-C1:** At first, Compound A (0.632g, 1.15 mmol) (synthesis is followed from the previous report)<sup>1</sup> and 4-Nitro 1,8 Napthalic Anhydride (0.27g, 1.09 mmol) were taken in 35 ml dried Toluene in a round bottle flask and the solution was stirred at 100°C for 24h under Argon atmosphere. Then reaction was stopped and allows cooling until reaches to room temperature and then the solution was evaporated to get the crude the product. Then it was purified by column chromatography using silica gel as stationary phase and 20% ethyl acetate in hexane as eluent to get the compound NMI-C1 as a light -yellow solid in 60% of yield. <sup>1</sup>H-NMR (400 MHz, CDCl<sub>3</sub>, TMS):  $\delta$  (ppm) = 8.90 (d, 1H), 8.72 (d, 1H), 8.70 (d, 1H), 8.40 (d, 1H), 7.98 (t, 1H), 6.90 (s, 2H), 3.5 (t, 4H), 3.95 (t, 6H), 1.74 (m, 6H), 1.34 (m, 6H), 1.30 (m, 24H), 0.90 (t, 9H).

ESI-MS:  $m/z$  calculated for [C<sub>45</sub>H<sub>63</sub>N<sub>3</sub>O<sub>8</sub>Na] (M+Na)<sup>+</sup> = 796.4615, Found-796.4511.

**Compound NMI-2:** At first, ethyl acetate was degassed and then Compound NMI-C1 (0.41g, 0.53mmol) was dissolved and Pd/C was added carefully to the solution. The reaction mixture was stirred under H<sub>2</sub> atmosphere at room temperature for 24h. Next, Pd/C was filtered off using celite 545 as filtering agent and then ethyl acetate was evaporated to get the brown color crude product. It was then washed with ethyl acetate to get the pure product as a yellow solid in 93% yield. <sup>1</sup>H-NMR (300MHz, CDCl<sub>3</sub> TMS):  $\delta$  (ppm) = 8.56 (d, 1H), 8.40 (d, 1H), 8.20 (d, 1H), 7.50 (t, 1H), 7.05 (t, 2H), 6.8 (d, 1H), 4.00 (t, 6H), 3.5 (t, 4H), 1.74 (m, 6H), 1.34 (m, 6H), 1.30 (m, 24H), 0.90 (m, 9H).

ESI-MS:  $m/z$  calculated for [C<sub>45</sub>H<sub>65</sub>N<sub>3</sub>O<sub>6</sub>Na] (M+Na)<sup>+</sup> = 766.4873, Found-766.5182.

**Synthesis of the Naphthalimide Derivative (NMI-C2):** The synthetic procedure of compound NMI-C is same as compound NMI-2 which is outlined below:

**Compound NMI-C<sub>0</sub>:** 4-Nitro 1,8 NaphthalicAnhydride(0.55g ,2.26 mmol) and n-Octyl amine (0.3g, 2.32 mmol) were taken in 30 ml of dried toluene and the solution was refluxed at 100<sup>0</sup>C for 24h under Argon atmosphere. Then the reaction was stopped to allow cool and the solvent was evaporated to get the crude product. It was purified by column chromatography using silica gel as stationary phase and 20%ethyl acetate in hexane as eluent to get the compound as a light -yellow solid in 75% yield.<sup>1</sup>H-NMR (300MHz, CDCl<sub>3</sub> TMS): δ (ppm) = 8.79 (d, 1H), 8.68 (d, 1H), 8.70 (d, 1H),8.36 (d, 1H), 7.95 (t, 1H), 4.11 (t, 2H), 1.30-1.65 (m, 12H), 0.90 (t, 3H).

ESI-MS: m/z calculated for [C<sub>20</sub>H<sub>22</sub>N<sub>2</sub>O<sub>4</sub>](M+H)<sup>+</sup> = 355.1580, Found-355.1572.

**Compound NMI-C<sub>2</sub>:** The compound NMI-C<sub>0</sub> (0.4g, 1.13 mmol) was dissolved in degassed ethyl acetate and then Pd/C was added carefully to this the solution. The reaction mixture was stirred under H<sub>2</sub> atmosphere at room temperature for 24h. Then Pd/C was filtered off using celite 545 as filtering agent. Then ethyl acetate was evaporated to get the pure product as yellow solid in 97% yield.<sup>1</sup>H-NMR (300MHz, CDCl<sub>3</sub> TMS): δ (ppm) = 8.55 (d, 1H), 8.36 (d, 1H), 8.05 (d, 1H), 7.62 (t, 1H), 6.83 (d, 1H), 4.07 (t, 2H), 1.30-1.65 (m, 12H), 0.90 (t, 3H).

ESI-MS: m/z calculated for [C<sub>20</sub>H<sub>24</sub>N<sub>2</sub>O<sub>2</sub>] (M+H)<sup>+</sup> = 325.1838, Found-325.9832.

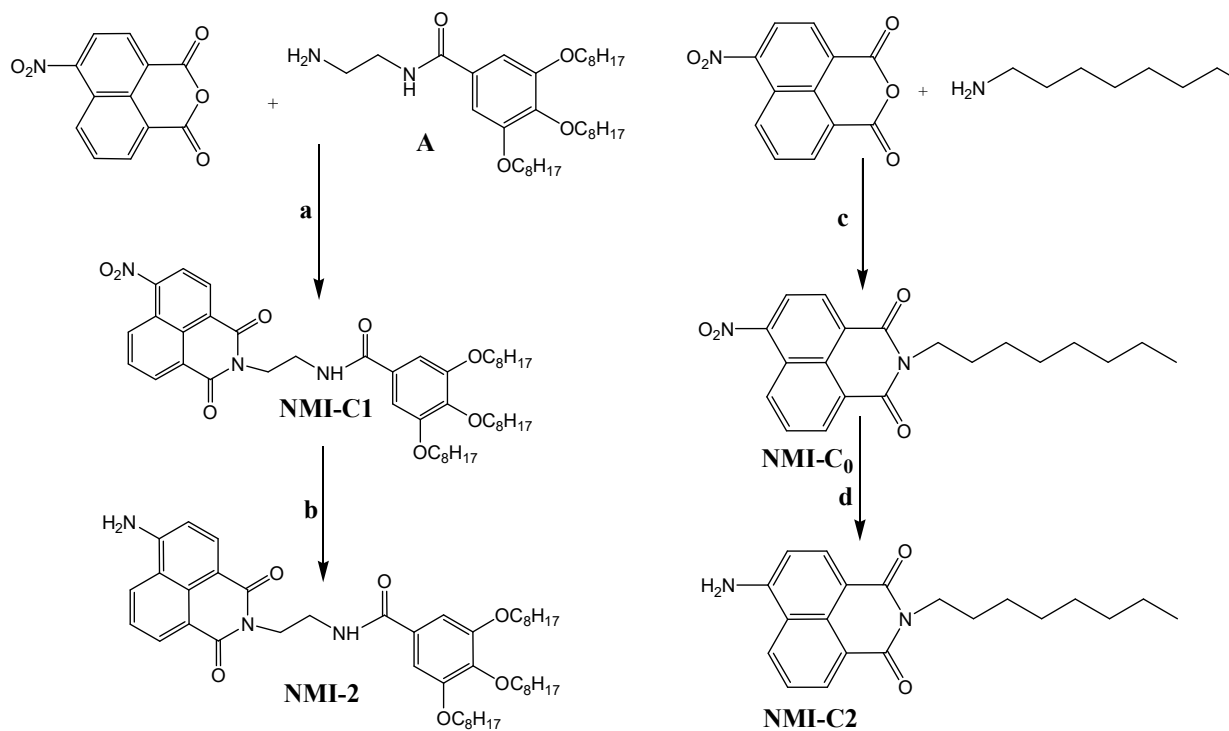

Reagents and conditions: a) Toluene, 100°C, 24h, 60%, b) Ethyl acetate, Pd/C, rt, 24h, 93%,  
 c) Toluene, 100°C, 24h, 75%, d) Ethyl acetate, Pd/C, rt, 24h, 97%.

**Scheme 1:** Schematic representation of the synthesis of NMI-2 and NMI-C2.

**Additional Figures:**

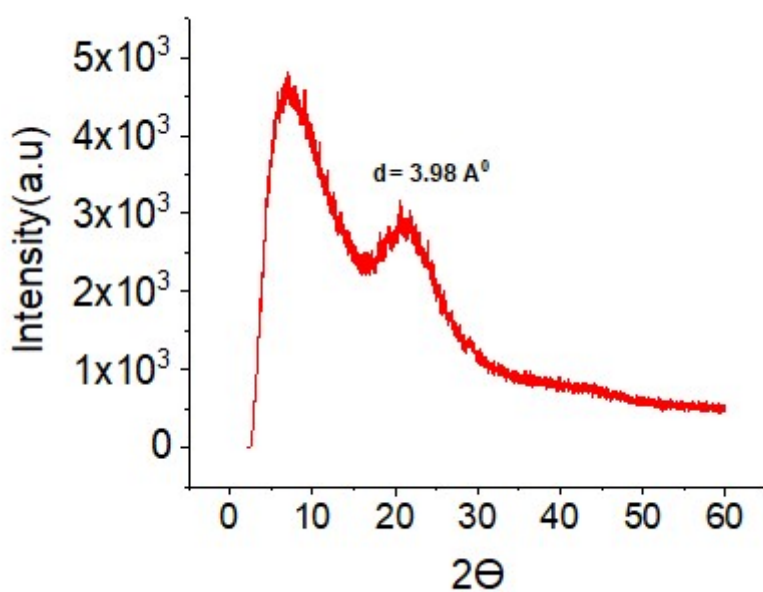

**Figure S1:** Powder X-RD plot of NMI-2 in presence of 0.5equiv. of  $F^-$  anion.

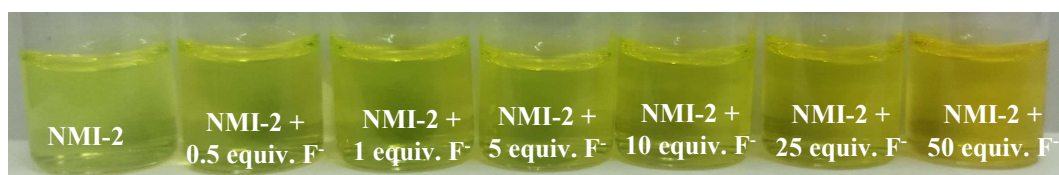

a. Under Normal light.

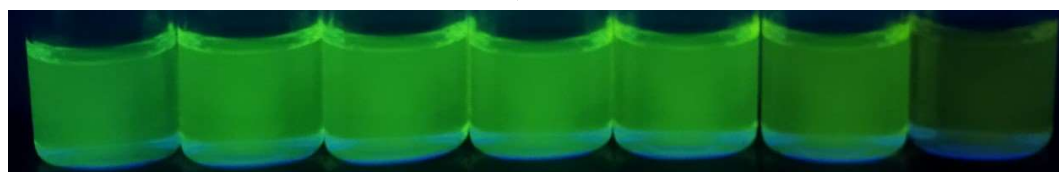

b. Under UV light.

**Figure S2:** Images of fluoride  $NMI.F^-$  adducts at variable NMI-2 and  $F^-$  ratio. a) Under normal light b) Under UV light.

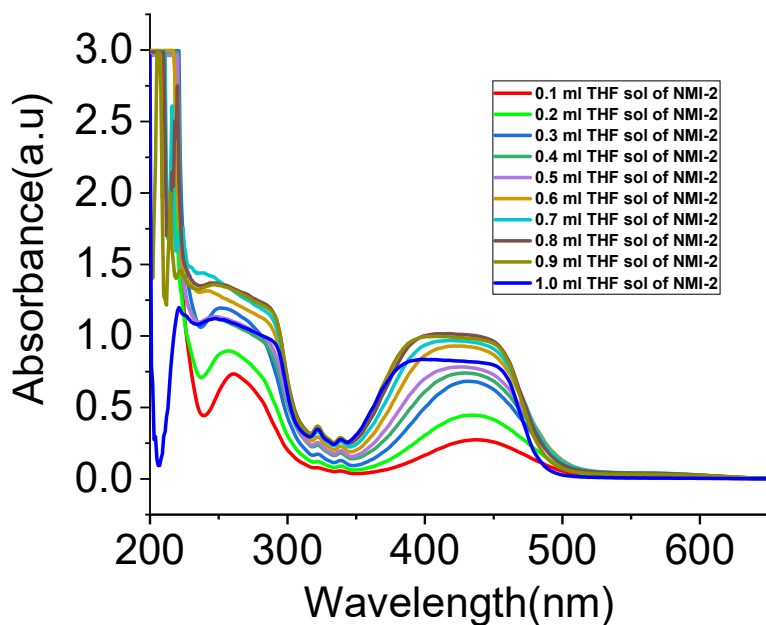

**Figure S3:** UV-vis spectra for Job's plot diagram to know the binding ratio of NMI and  $F^-$  anion and binding constant.

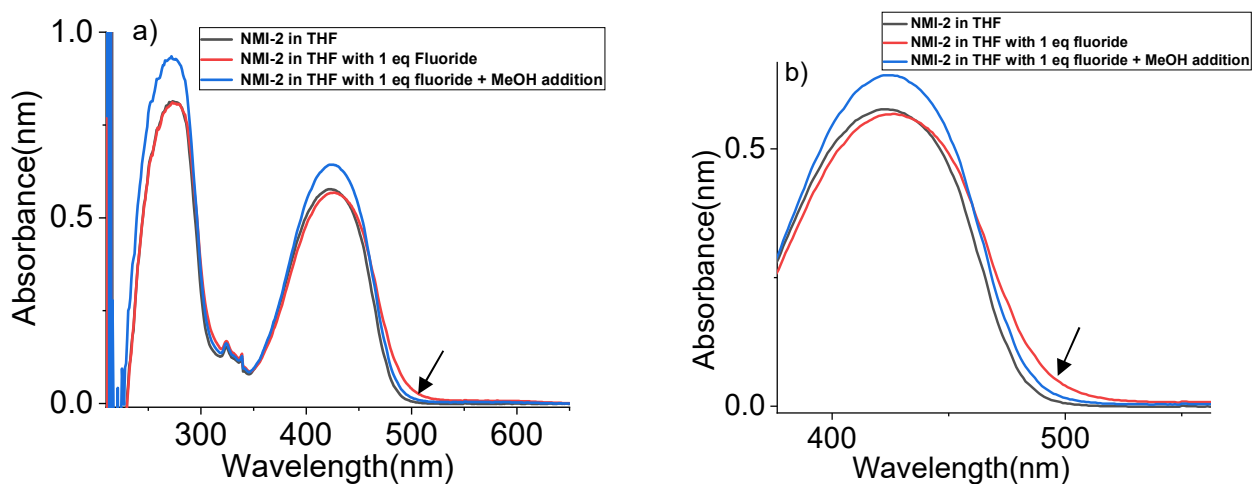

**Figure S4:** Methanol additions to NMI.1 $F^-$  adduct, a) full spectrum b) zoomed spectrum.



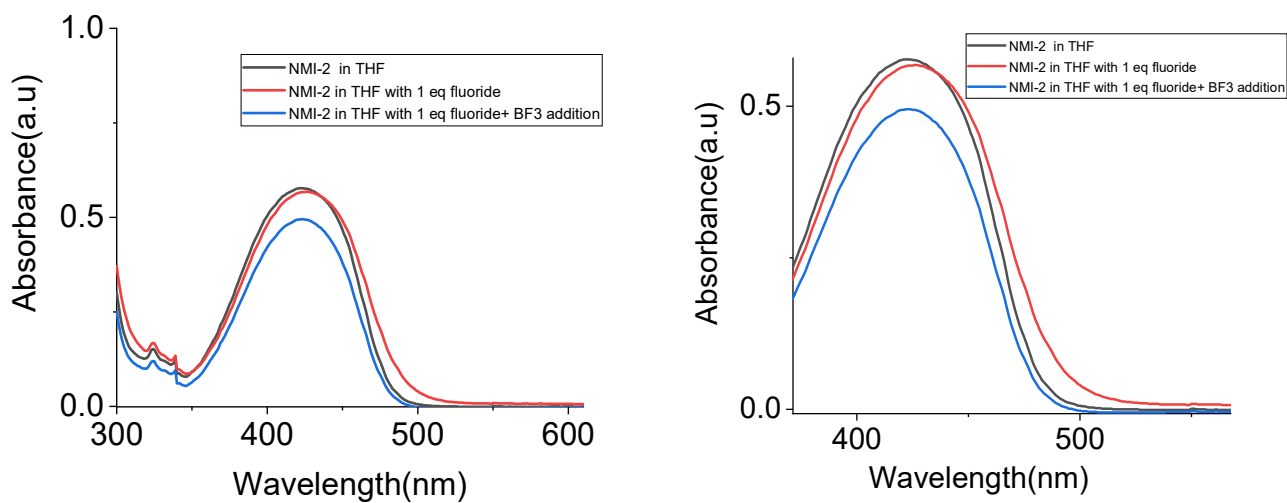

**Figure S5:**  $\text{BF}_3$  additions to  $\text{NMI} \cdot 1\text{F}^-$  adduct, a) Full spectrum b) Zoomed spectrum.

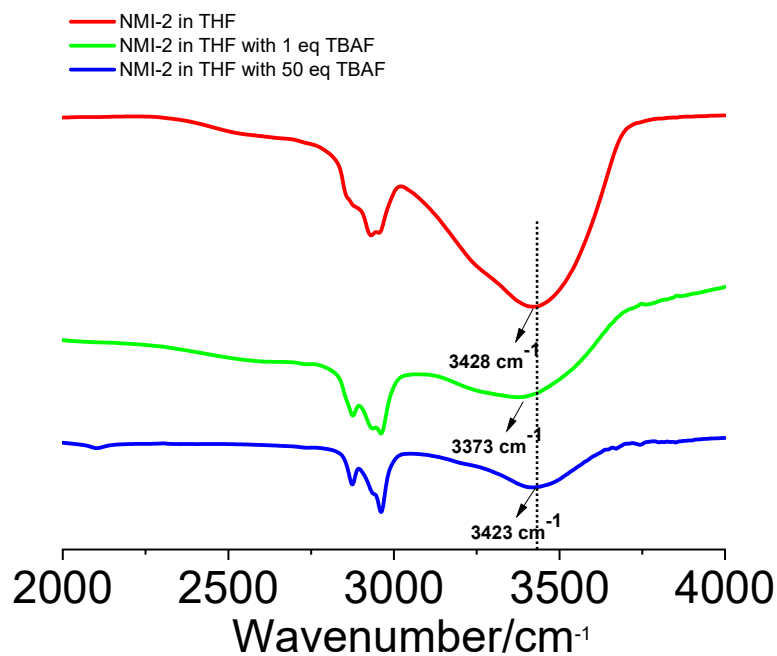

**Figure S6:** Combined IR plot of  $\text{NMI} \cdot 2$  in THF,  $\text{NMI} \cdot 1\text{F}^-$  ( $\text{NMI} \cdot 2 : \text{F}^- = 1:1$ ) and  $\text{NMI} \cdot 50\text{F}^-$  ( $\text{NMI} \cdot 2 : \text{F}^- = 1:50$ ) adducts.

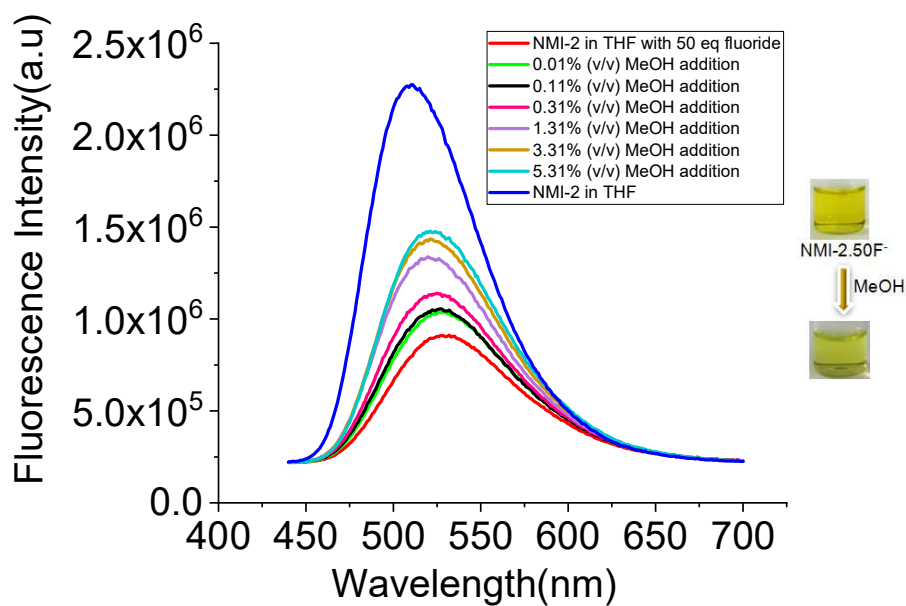

**Figure S7:** Monitoring emission spectra upon addition of MeOH to NMI.50 F<sup>-</sup> (NMI:F<sup>-</sup> = 1:50) solution.

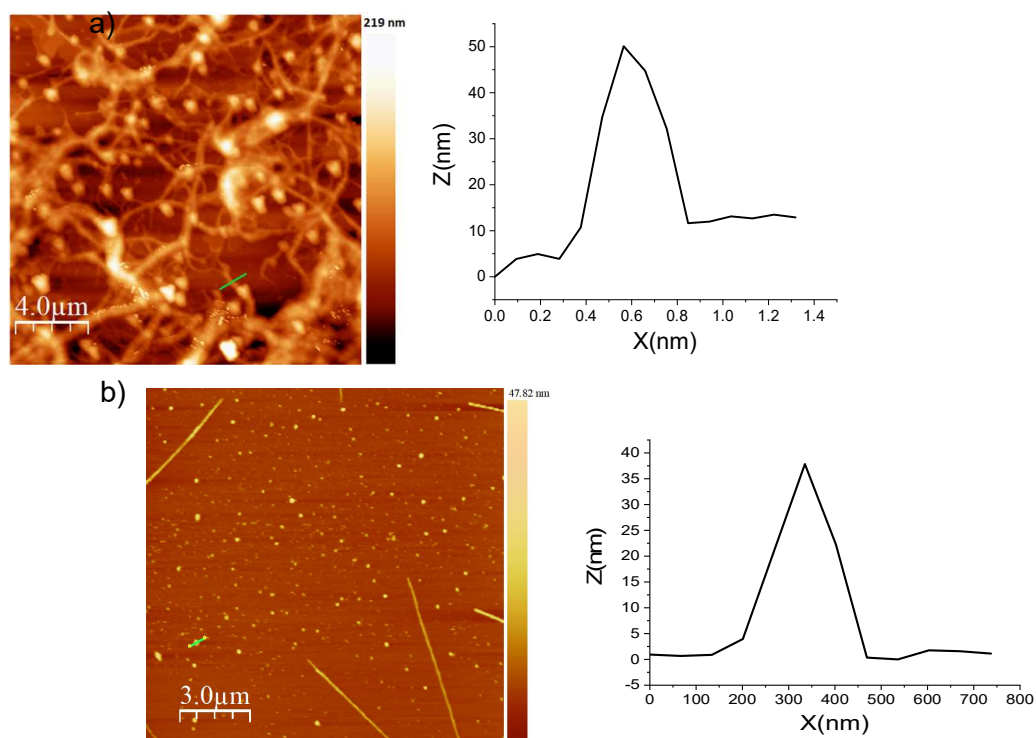

**Figure S8:** AFM images of a) NMI.0.5F<sup>-</sup> (NMI: F<sup>-</sup> = 1:0.5) b) NMI.50 F<sup>-</sup> (NMI:F<sup>-</sup> = 1:50) solution in THF. Figure a shows incomplete polymerization in presence of 0.5 equiv. of F<sup>-</sup> and figure b shows completely depolymerized structure.

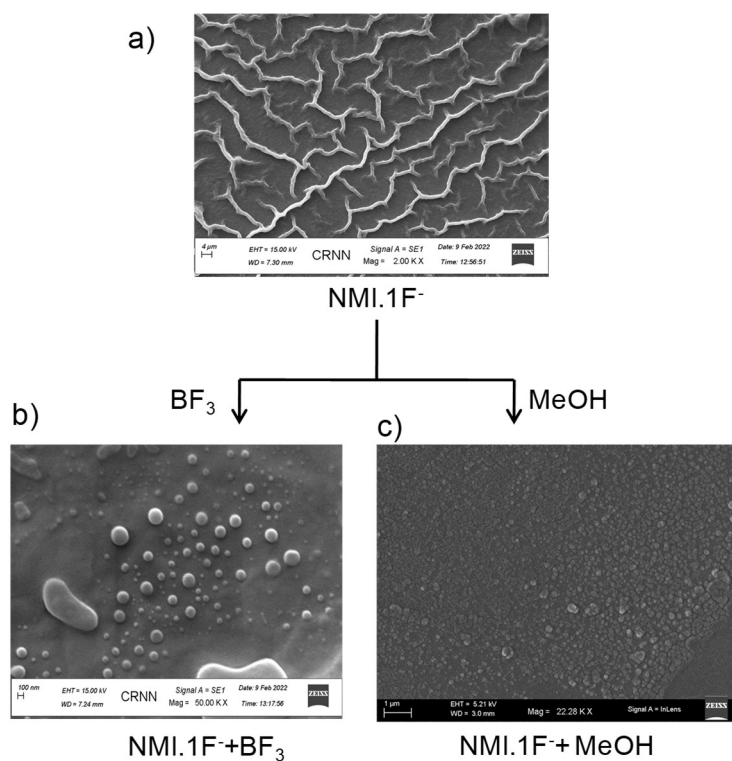

**Figure S9:** SEM images of a) NMI-2 upon addition of 1 equiv. of F<sup>-</sup> anion; b) BF<sub>3</sub> addition to NMI.1F<sup>-</sup> (NMI-2: F<sup>-</sup> = 1:1) solution; c) MeOH addition to NMI.1F<sup>-</sup> solution. Nanofiber to nanoparticle transformation indicates depolymerization of supramolecular polymer upon addition of BF<sub>3</sub> or MeOH.

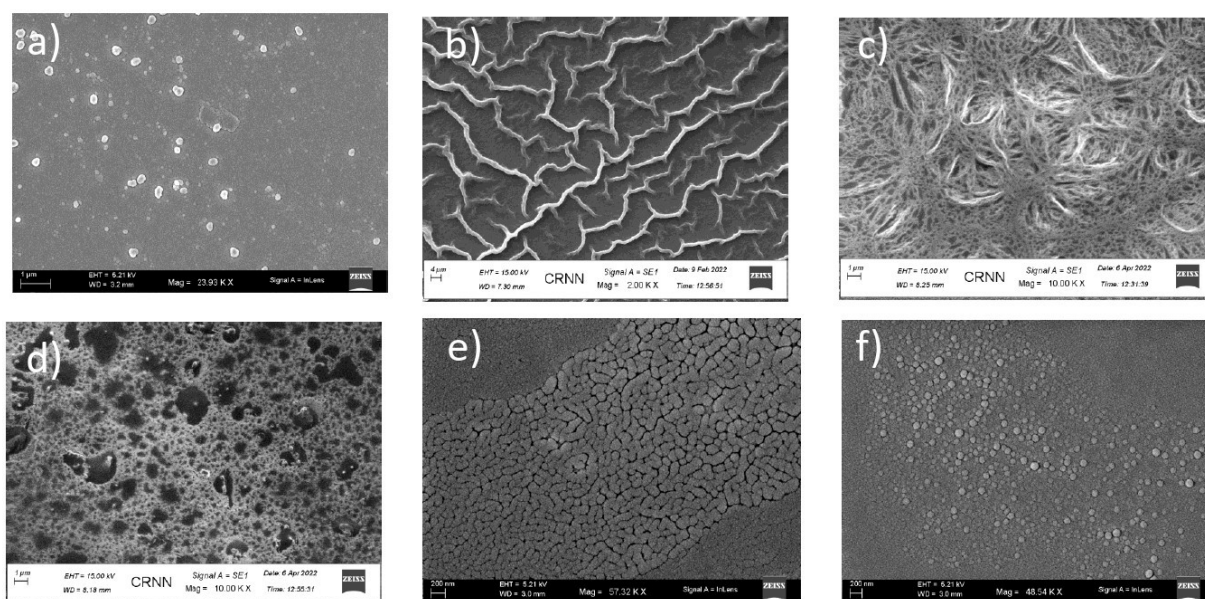

**Figure S10:** Morphology tuning by varying NMI-2 and  $F^-$  anion ratio in the solution. SEM images of a) NMI-2, b) NMI.1 $F^-$  (NMI-2:  $F^-$  = 1:1), c) NMI.5 $F^-$  (NMI-2:  $F^-$  = 1:5), d) NMI.10 $F^-$  (NMI-2:  $F^-$  = 1:10), e) NMI.25 $F^-$  (NMI-2:  $F^-$  = 1:25), and f) NMI.50 $F^-$  (NMI-2:  $F^-$  = 1:50) adduct.

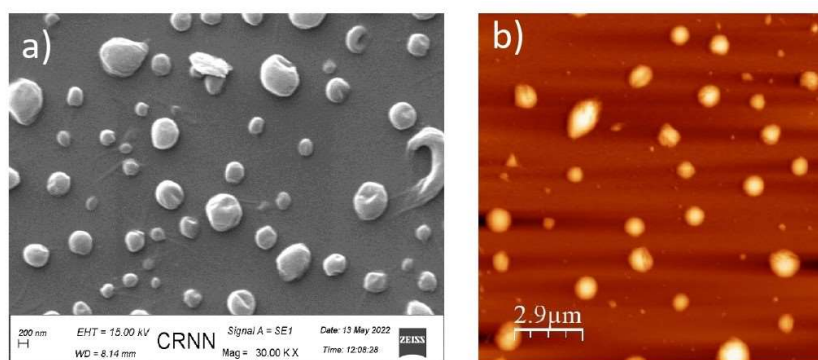

**Figure S11:** a) SEM image of NMI-C1 without  $F^-$  anion and b) AFM of NMI-C1 in presence of 1equiv. of  $F^-$  anion.

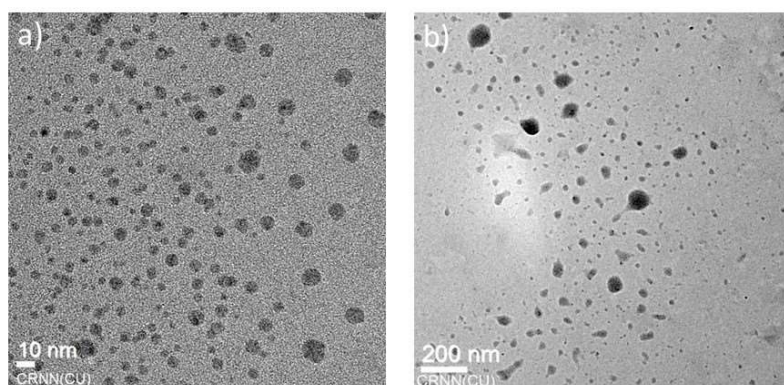

**Figure S12:**TEM image of NMI-C2; a) without  $F^-$  anion and b) with 1equiv. of  $F^-$  anion.

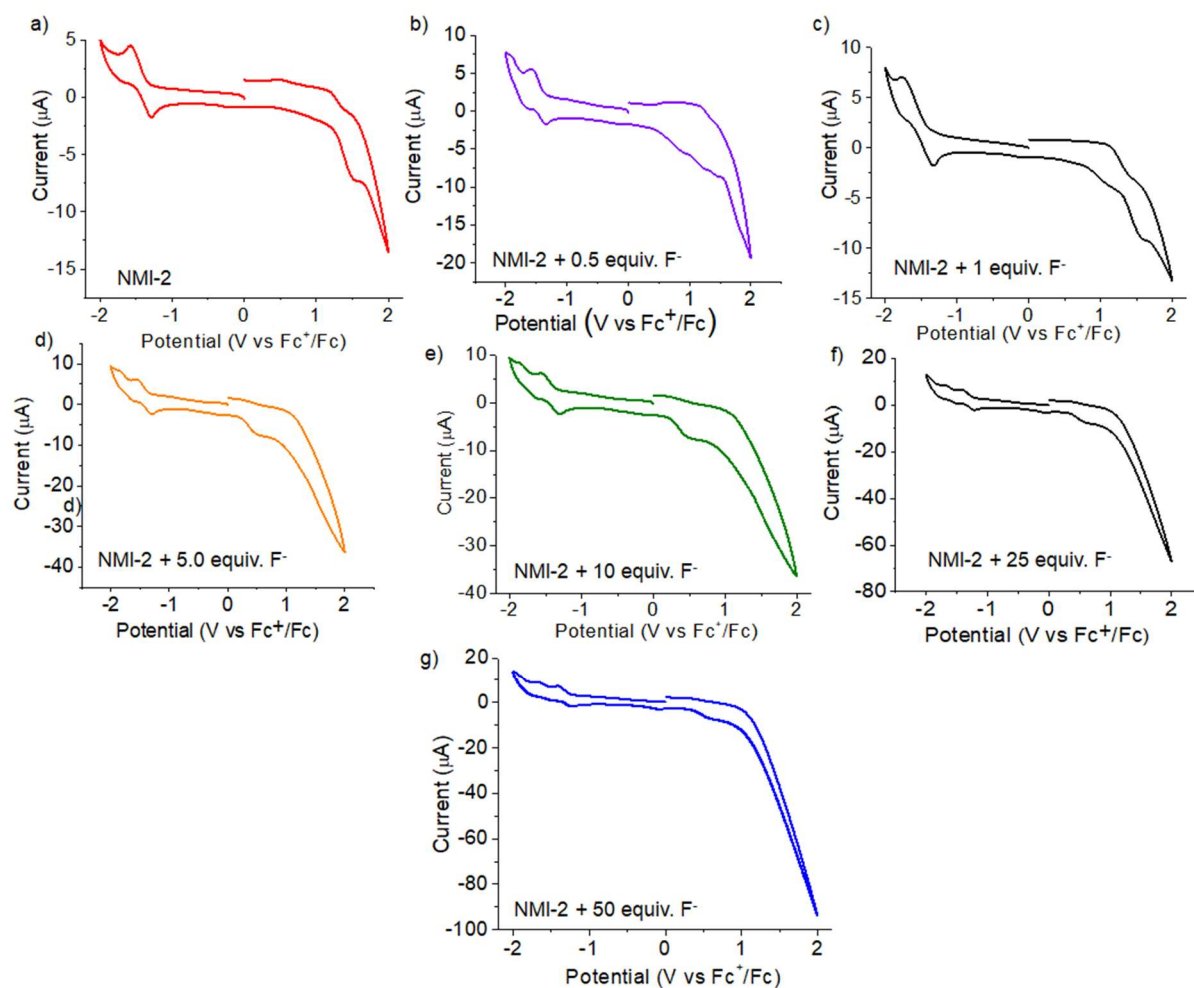

**Figure S13:**Cyclic Voltamogramsplot of NMI-2 in presence a) in absence and in presence of b) 0.5equiv, c) 1equiv. d) 5 equiv., e) 10 equiv., f) 25 equiv. and g) 50equiv.  $F^-$  anion. Solvent = THF, supporting electrolyte = TBAP (Tetrabutyl ammonium perchlorate). Potentials are internally referenced to the ferrocene/ferrocenium ( $Fc/Fc^+$ ) couple.

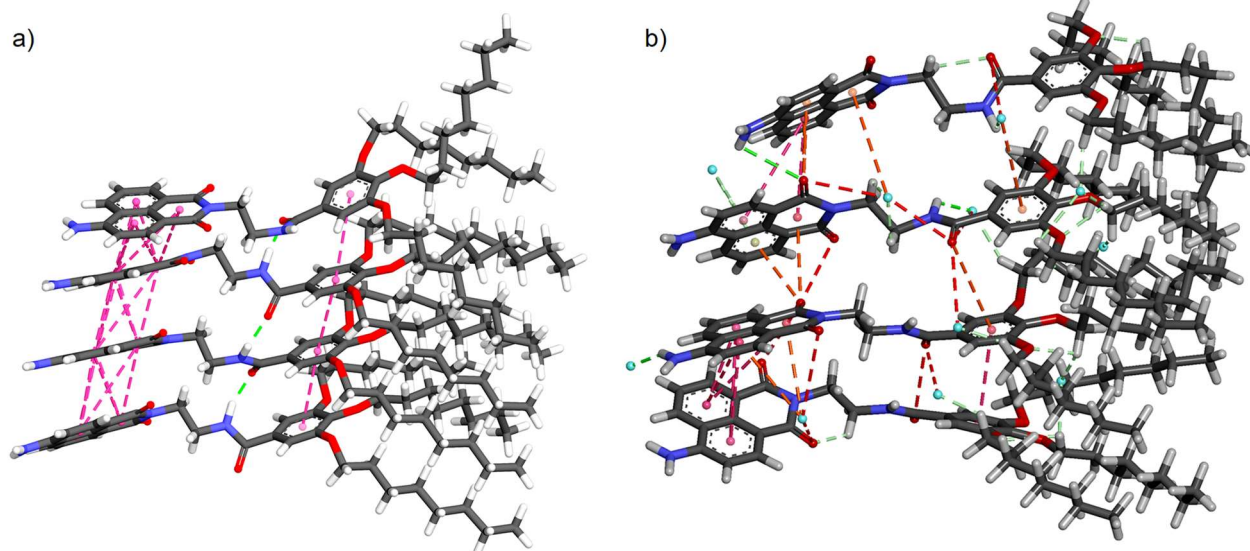

**Figure S14:** Computational tetramer of NMI-2 a) in absence of  $F^-$  anion and b) in presence of excess of  $F^-$  anion. Excess anions destroyed the ordered structure as shown in the picture. Pink and green dotted line indicates  $\pi$ - $\pi$  stacking and H-bonding respectively. Light green point represents  $F^-$  anion.

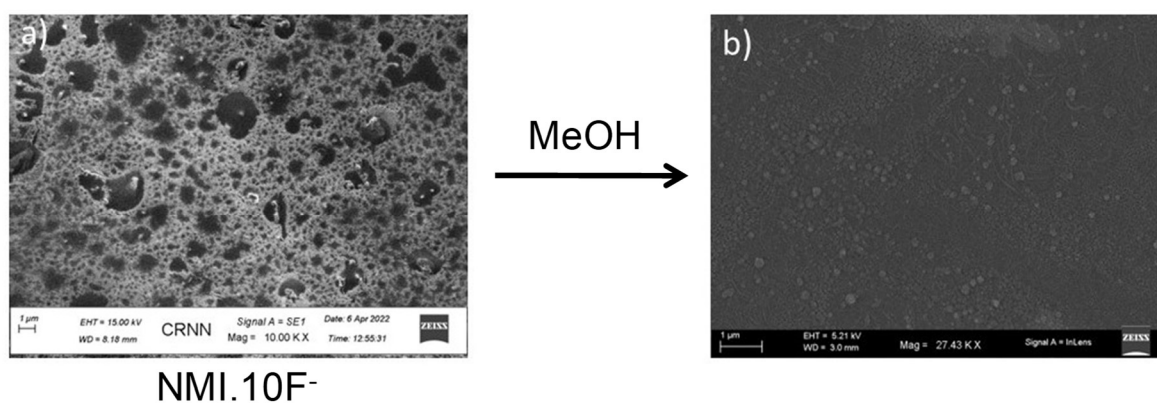

**Figure S15:** SEM image of NMI-2.10 $F^-$  (NMI-2:  $F^-$  = 1:10) adduct a) before and b) after methanol addition.

**Table S1:** Fluorescence lifetime data.

| Sample                       | Component Lifetimes(ns) <sup>a</sup> |               |              |
|------------------------------|--------------------------------------|---------------|--------------|
|                              | $\tau_1$                             | $\tau_2$      | $\tau_{avg}$ |
| 0 eqv fluoride in 100% THF   | 3.55(4.39%)                          | 10.36(95.61%) | 10.06        |
| 0.5 eqv fluoride in 100% THF | 3.22(4.39%)                          | 9.96(95.61%)  | 9.66         |
| 1 eqv fluoride in 100% THF   | 2.89(4.31%)                          | 9.73(95.69%)  | 9.44         |
| 5 eqv fluoride in 100% THF   | 1.95(6.73%)                          | 8.11(93.27%)  | 7.70         |
| 10 eqv fluoride in 100% THF  | 1.51(11.65%)                         | 6.56(88.35%)  | 5.97         |
| 25 eqv fluoride in 100% THF  | 1.22(15.61%)                         | 5.56(84.39%)  | 4.88         |
| 50 eqv fluoride in 100% THF  | 0.91(24.86%)                         | 4.11(75.14%)  | 3.31         |

Values in parenthesis shows the decay contribution corresponding to each lifetime. Average lifetimes ( $\tau_{avg}$ ) were calculated using the following equation:  $\tau_{avg} = a_1\tau_1 + a_2\tau_2$ .

**Table S2:** HOMO-LUMO energy level from UV/Vis and CV experiments

| System                | $E_g^{opt}$ [eV] | $E_{ox}$ [V] | $E_{red}$ [V] | $E_{HOMO}$ [eV] | $E_{LUMO}$ [eV] | $E_g^{CV}$ [eV] | Conductivity (S.cm <sup>-1</sup> ) |
|-----------------------|------------------|--------------|---------------|-----------------|-----------------|-----------------|------------------------------------|
| NMI.0F <sup>-</sup>   | 2.57             | 1.37         | -1.43         | -5.77           | -2.97           | 2.80            | 1.76x10 <sup>-8</sup>              |
| NMI.0.5F <sup>-</sup> | 2.53             | 1.31         | -1.47         | -5.71           | -2.93           | 2.78            | 1.29x10 <sup>-6</sup>              |
| NMI.1F <sup>-</sup>   | 2.52             | 1.18         | -1.55         | -5.58           | -2.86           | 2.72            | 1.36x10 <sup>-6</sup>              |
| NMI.5F <sup>-</sup>   | 2.44             | 0.55         | -1.58         | -4.95           | -2.82           | 2.13            | 6.69x10 <sup>-6</sup>              |
| NMI.10F <sup>-</sup>  | 2.38             | 0.46         | -1.58         | -4.86           | -2.82           | 2.04            | 1.45x10 <sup>-4</sup>              |
| NMI.25F <sup>-</sup>  | 2.37             | 0.58         | -1.31         | -4.98           | -3.09           | 1.89            | 6.7x10 <sup>-5</sup>               |
| NMI.50F <sup>-</sup>  | 2.32             | 0.57         | -1.31         | -4.97           | -3.09           | 1.88            | 1.6x10 <sup>-5</sup>               |

NMI.0F<sup>-</sup> (NMI: F<sup>-</sup> = 1:0), NMI.0.5F<sup>-</sup> (NMI: F<sup>-</sup> = 1:0.5), NMI.1F<sup>-</sup> (NMI: F<sup>-</sup> = 1:1), NMI.5F<sup>-</sup> (NMI: F<sup>-</sup> = 1:5), NMI.10F<sup>-</sup> (NMI: F<sup>-</sup> = 1:10), NMI.25F<sup>-</sup> (NMI: F<sup>-</sup> = 1:25), NMI.50F<sup>-</sup> (NMI: F<sup>-</sup> = 1:50).





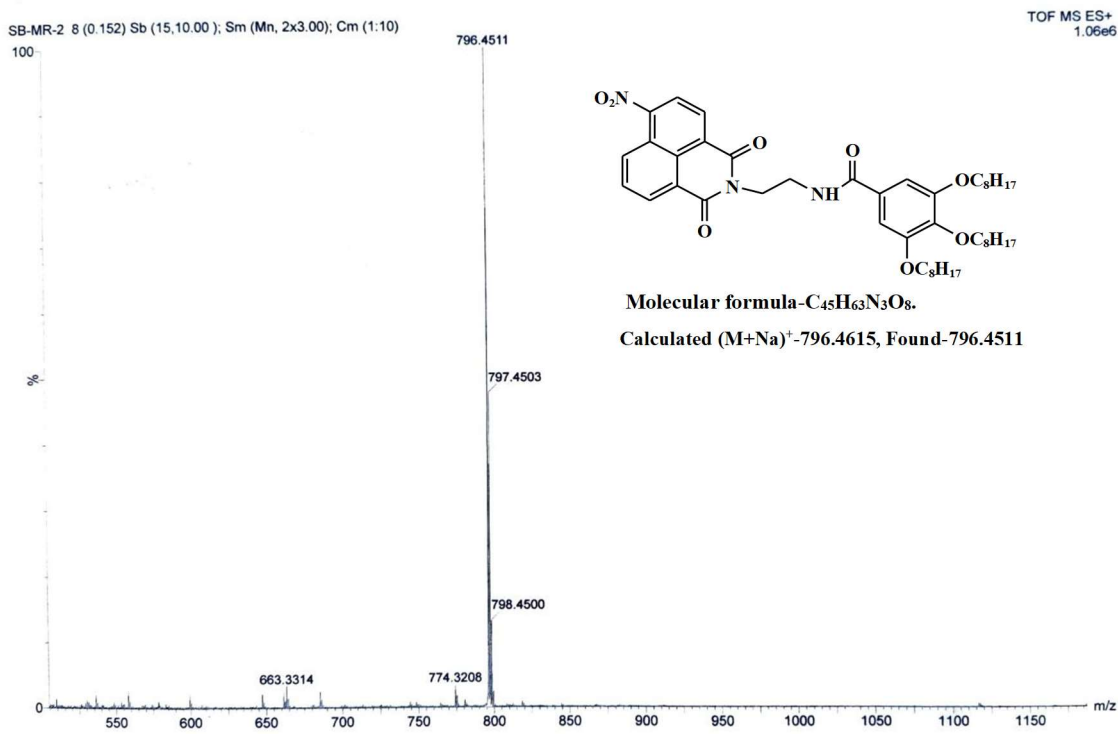

Figure S18: ESI-MS spectrum of Compound NMI-C1.

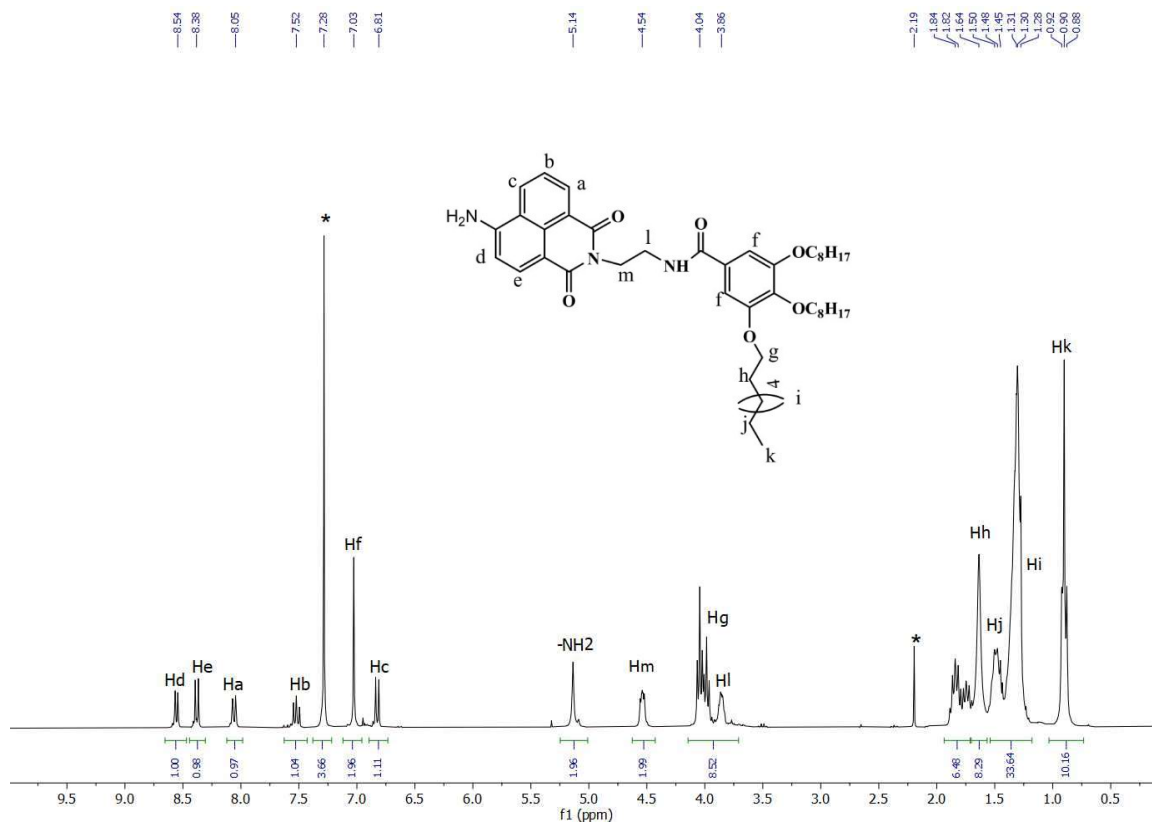

Figure S19:  $^1H$ -NMR spectrum of Compound NMI-2. Solvent- $CDCl_3$ \*indicatessolventpeak

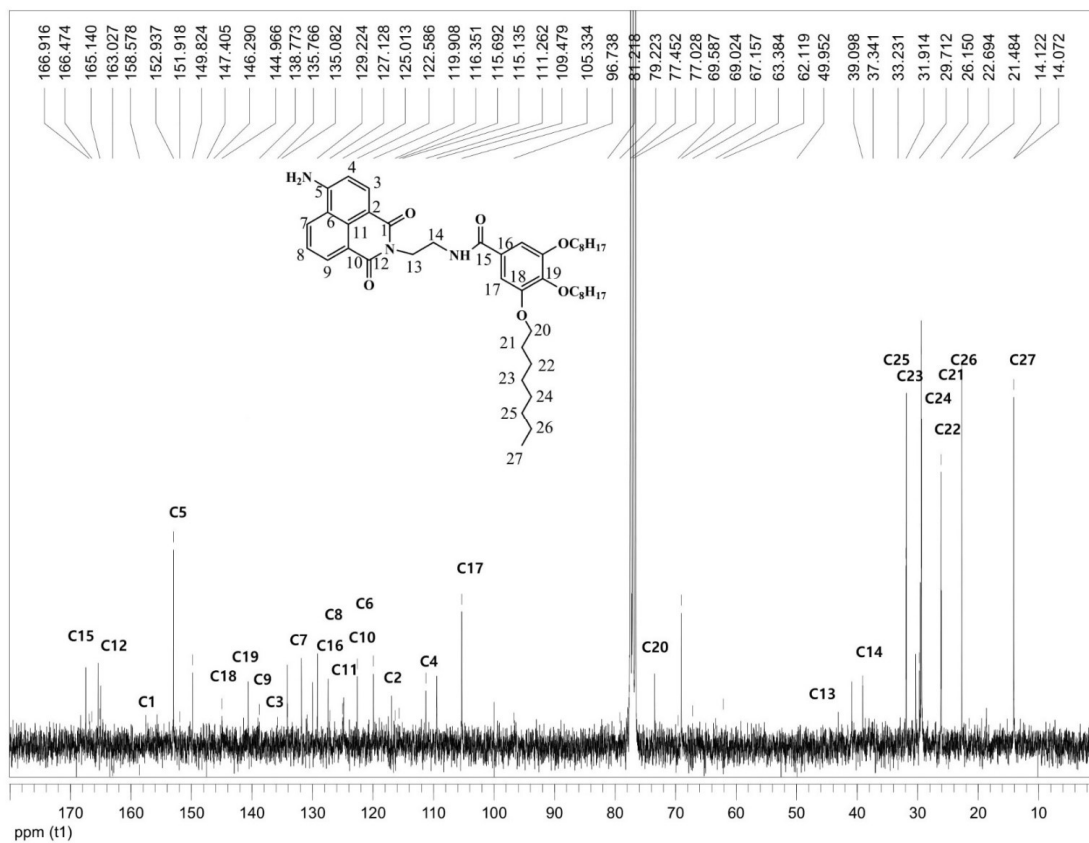

**Figure S20:**  $^{13}\text{C}$ -NMR spectrum of Compound NMI-2. Solvent- $\text{CDCl}_3$ .

SB-M-R4 1 (0.034) Sm (Mn, 2x3.00)  
100

685.4482

TOF MS ES+  
3.66e3

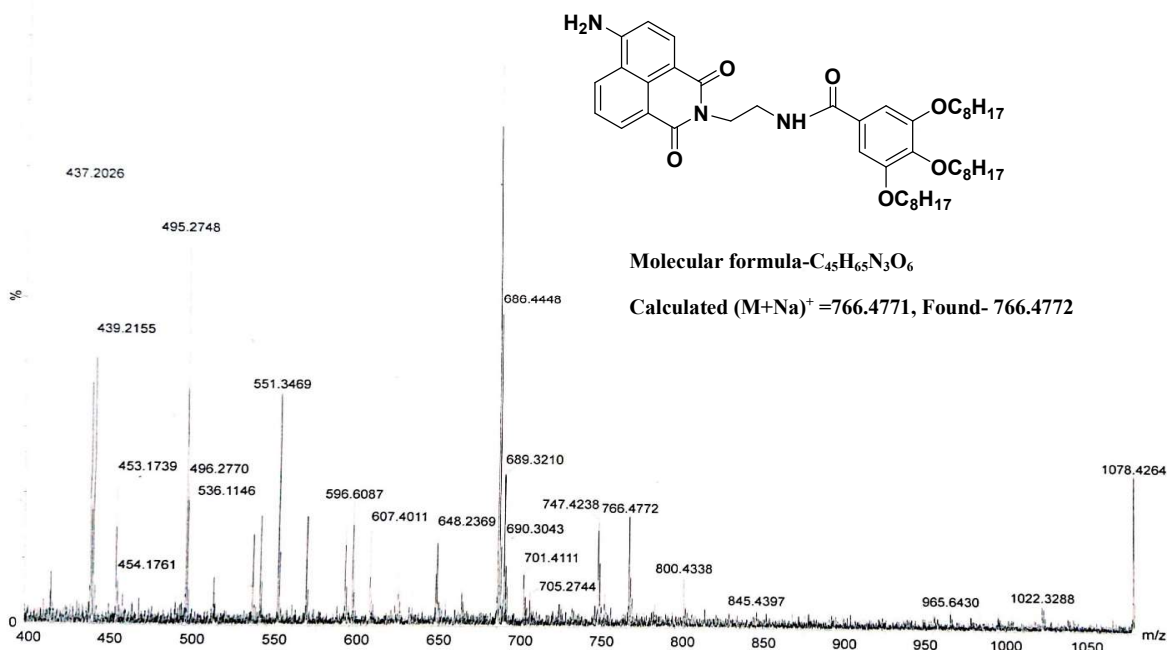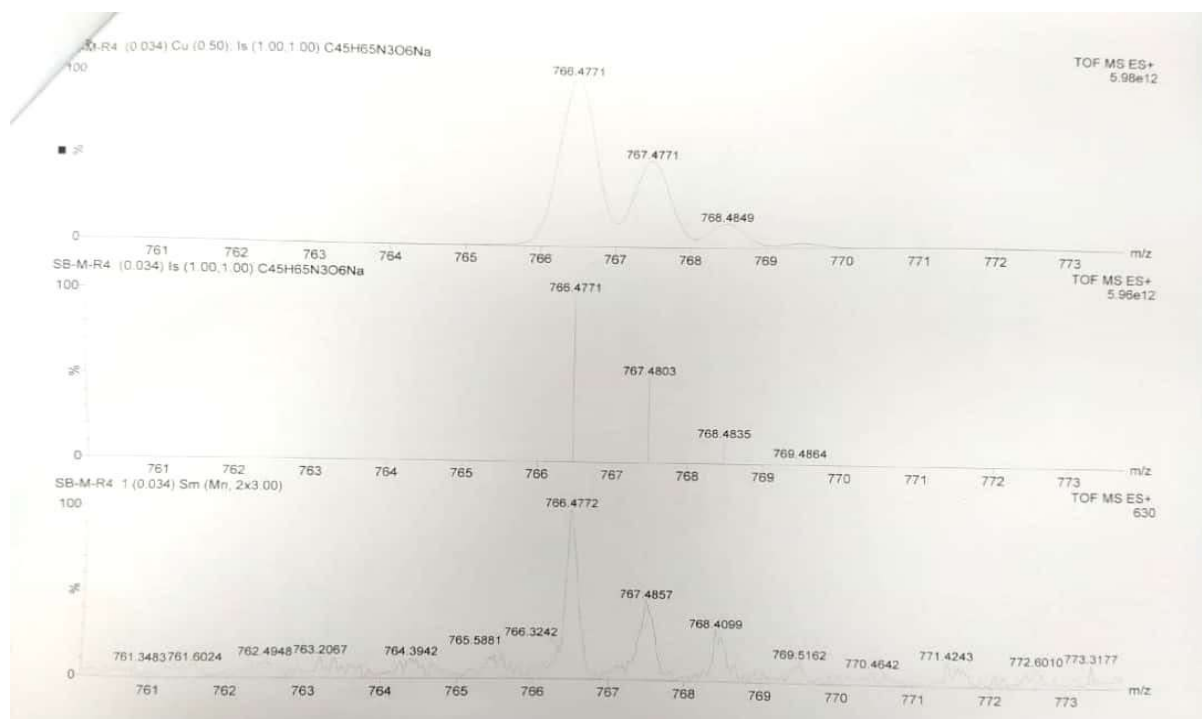

**Figure S21:** ESI-MS spectrum of Compound NMI-2.

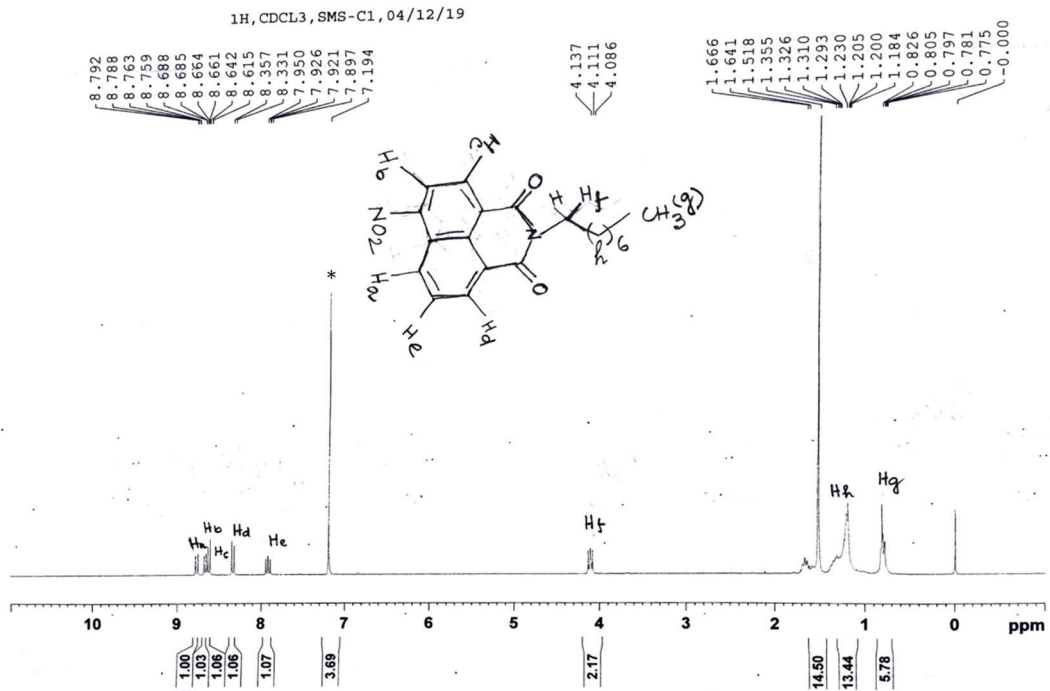

FigureS22: <sup>1</sup>H-NMR spectrum of Compound NMI-C<sub>0</sub>. Solvent-CDCl<sub>3</sub>. \* indicates solvent peak

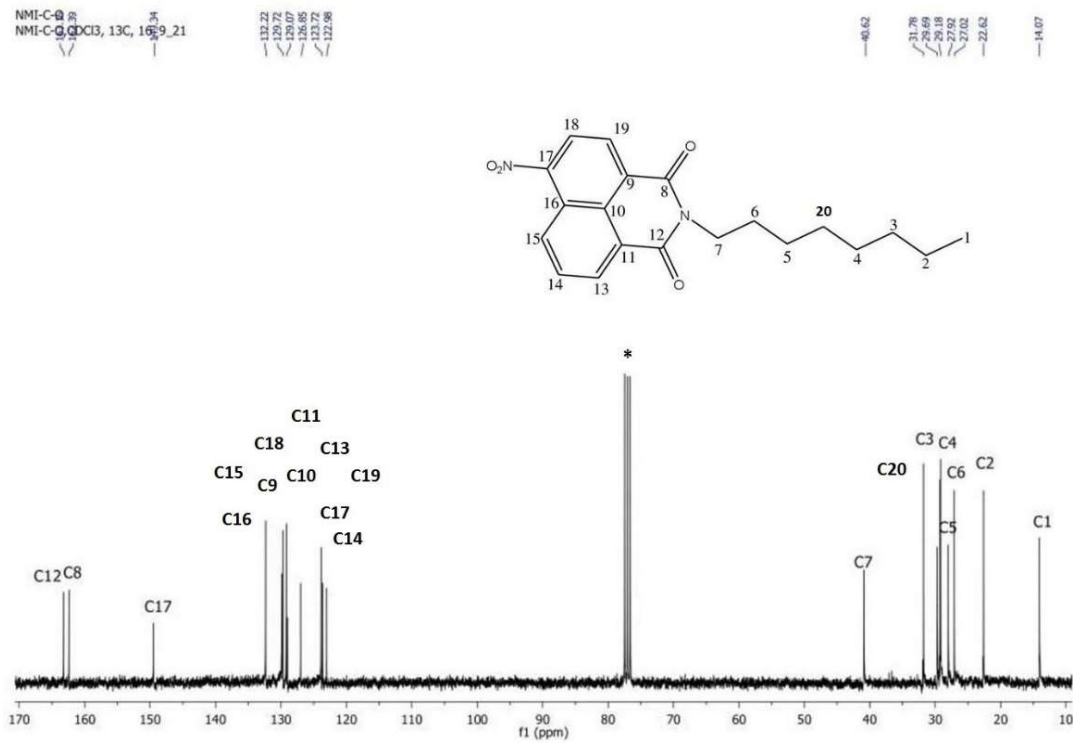

FigureS23: <sup>13</sup>C-NMR spectrum of Compound NMI-C<sub>0</sub>. Solvent-CDCl<sub>3</sub>. \* indicates solvent peak

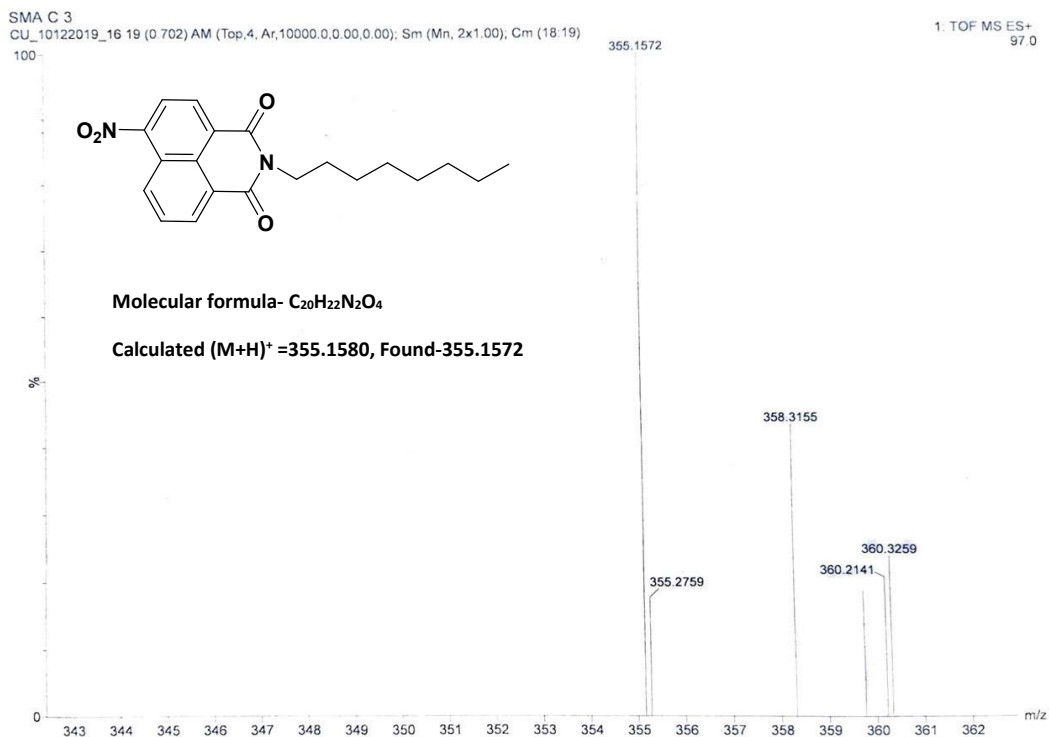

FigureS24:ESI-MSspectrumofNMI-C<sub>0</sub>

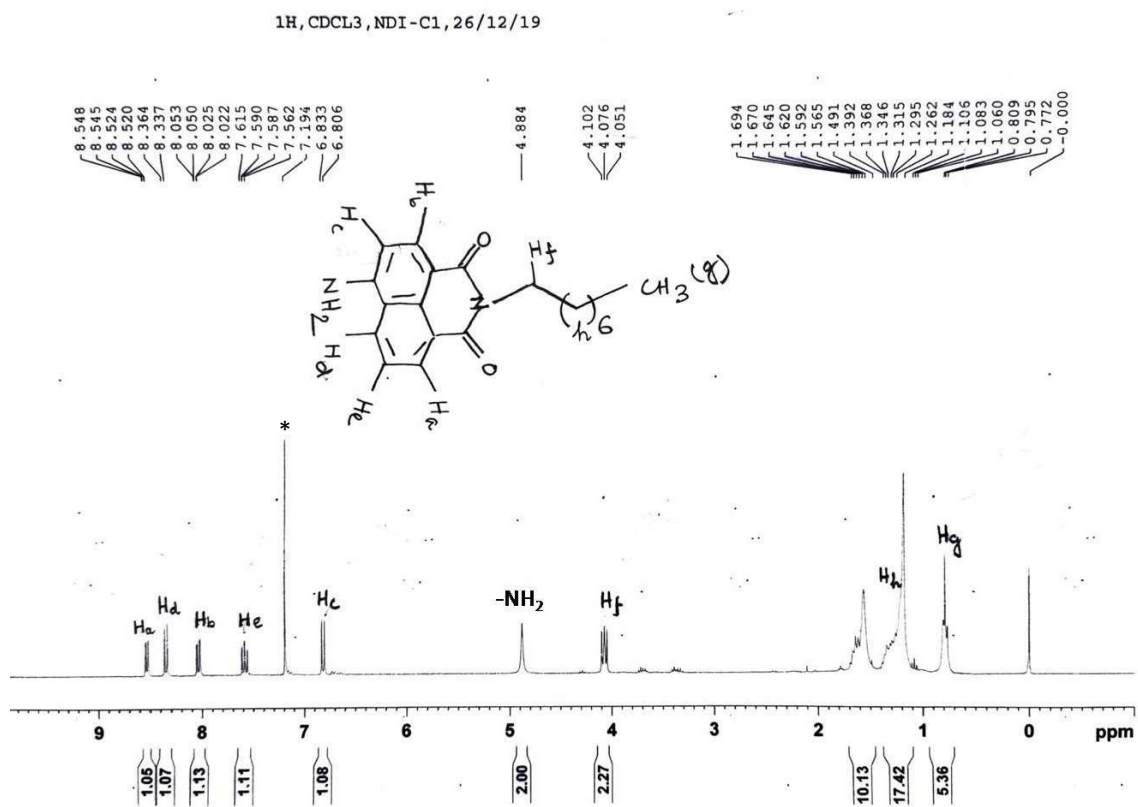

FigureS25:  $^1H$ -NMRspectrumofCompoundNMI-C2.Solvent- $CDCl_3$ . \*indicatessolventpeak.

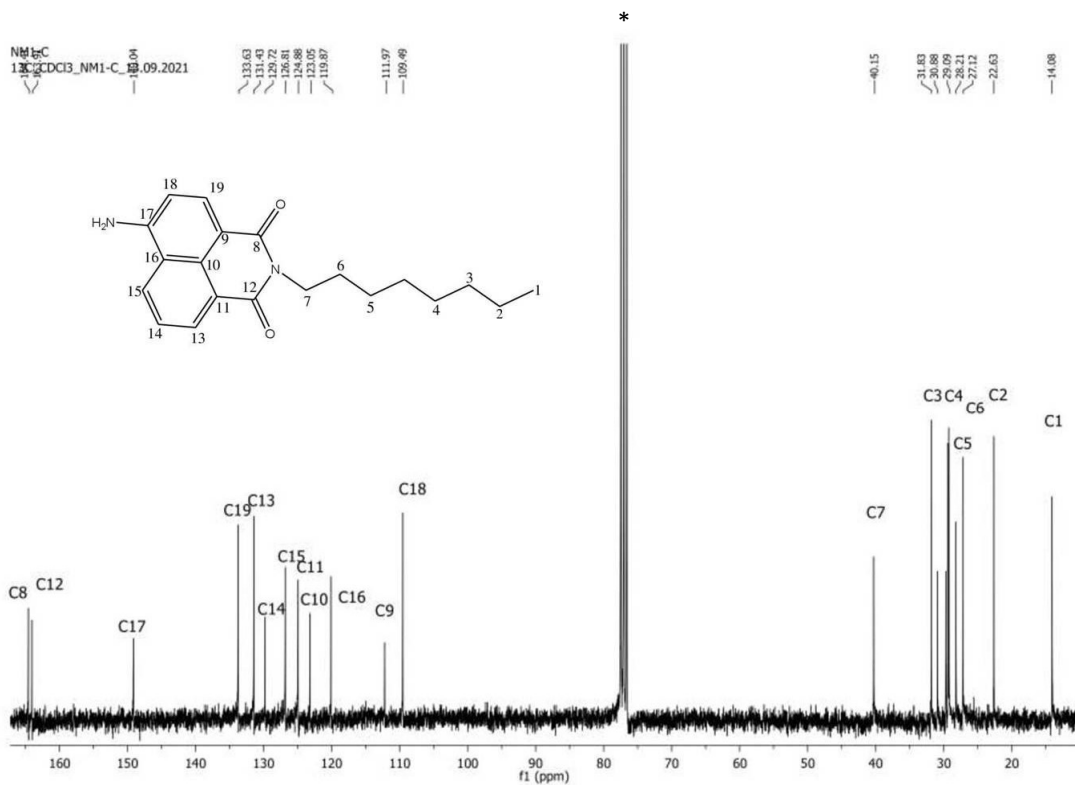

Figure S26:  $^{13}\text{C}$ -NMR spectrum of Compound NMI-C2. Solvent- $\text{CDCl}_3$ . \* indicates solvent peak

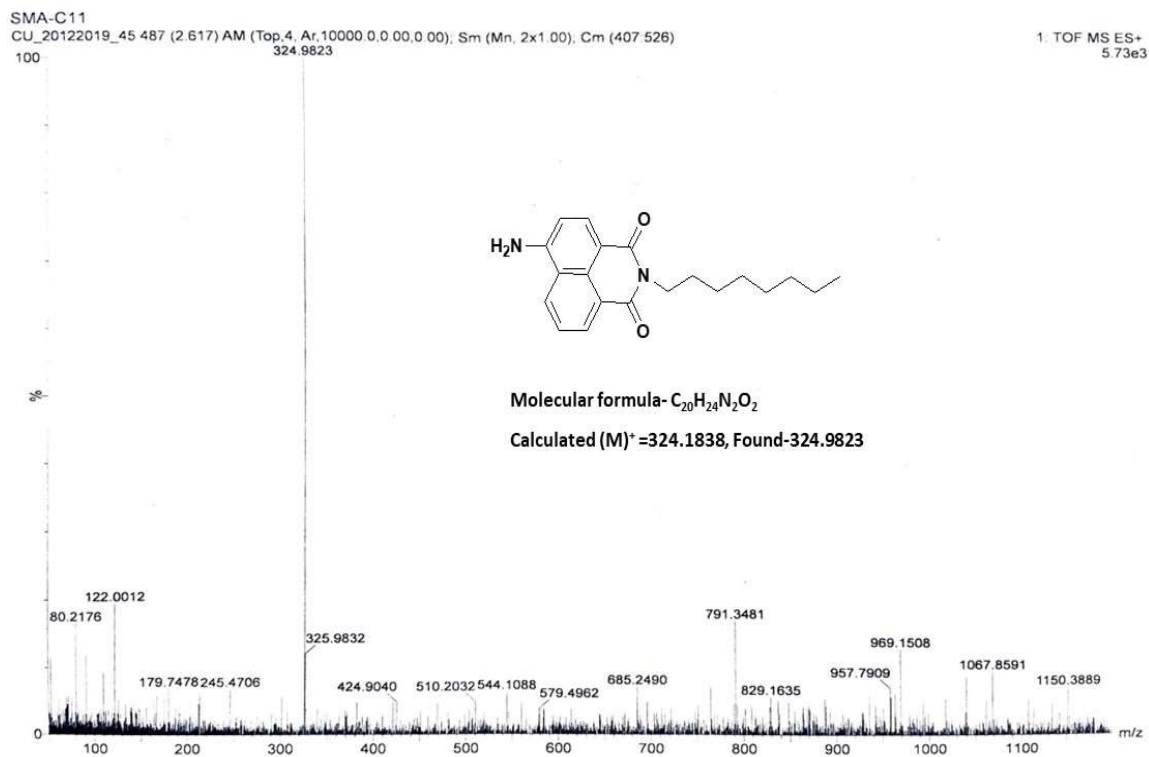

Figure S27: ESI-MS spectrum of NMI-C2.

## Computational

The compound NMI-2 and its assembly in the presence of F<sup>-</sup> ion with different amount was investigated using DFT method.<sup>2,3</sup> Gaussian 09W D1 revision<sup>4</sup> using the  $\omega$ B97XD functional and 6-311G(d,p) basis set to optimize the geometry of the molecule. The 6-31G (d,p) basis set has been employed for the molecular electrostatic potential map (MEP) generation. HOMO, LUMO, and MEP were visualized using GaussView 5 software.<sup>5</sup>

## NCI Plot

NCIPLOT Version 4.0 was utilized for the calculations of NCI Plot of interactions between **2** and amino acids present in the vicinity of the molecule using standard procedure.<sup>6</sup>

## Coordinates of the energy minimized compound

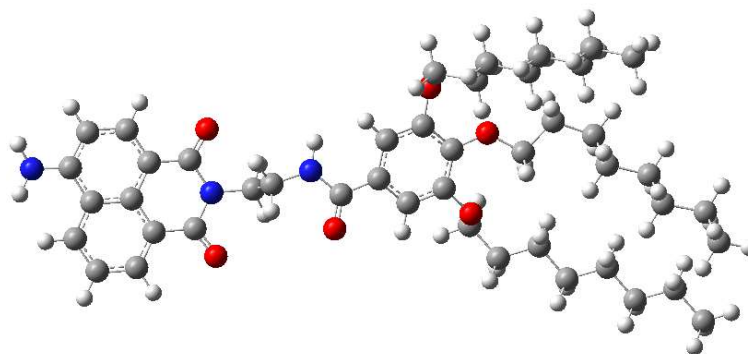

Energy = -2385.32486 Hartree

|   |             |            |              |
|---|-------------|------------|--------------|
| C | 9.95110000  | 5.43420000 | -12.45800000 |
| C | 10.30480000 | 4.14790000 | -12.82810000 |
| C | 10.66210000 | 3.16870000 | -11.84960000 |
| C | 10.61280000 | 3.54330000 | -10.48250000 |
| C | 10.23710000 | 4.86180000 | -10.11380000 |
| C | 9.91780000  | 5.78600000 | -11.10660000 |
| C | 11.06450000 | 1.85100000 | -12.18390000 |
| C | 11.38270000 | 0.94010000 | -11.20090000 |
| C | 11.31780000 | 1.30990000 | -9.84890000  |
| C | 10.94140000 | 2.59420000 | -9.47960000  |
| C | 10.87960000 | 2.98560000 | -8.07650000  |
| N | 10.53640000 | 4.29250000 | -7.72580000  |
| C | 10.18910000 | 5.22510000 | -8.70790000  |
| O | 9.83720000  | 6.33690000 | -8.31510000  |
| O | 11.11700000 | 2.20450000 | -7.16270000  |
| N | 10.29840000 | 3.83540000 | -14.16860000 |
| C | 10.50720000 | 4.69770000 | -6.29210000  |
| C | 9.04610000  | 4.55440000 | -5.82740000  |
| N | 8.94020000  | 5.27700000 | -4.55020000  |
| C | 9.18640000  | 4.69940000 | -3.33220000  |

|   |             |             |              |
|---|-------------|-------------|--------------|
| C | 9.08920000  | 5.50500000  | -2.10950000  |
| O | 9.49790000  | 3.51640000  | -3.33120000  |
| C | 9.59790000  | 4.99570000  | -0.90370000  |
| C | 9.53190000  | 5.74390000  | 0.26790000   |
| C | 8.94410000  | 7.01910000  | 0.26870000   |
| C | 8.42860000  | 7.51960000  | -0.93190000  |
| C | 8.49590000  | 6.78010000  | -2.10760000  |
| O | 7.83810000  | 8.76510000  | -0.97790000  |
| O | 8.83520000  | 7.82380000  | 1.39990000   |
| O | 10.05970000 | 5.17720000  | 1.40440000   |
| C | 11.49440000 | 5.18540000  | 1.57370000   |
| C | 11.78090000 | 4.28970000  | 2.78630000   |
| C | 11.14860000 | 4.82060000  | 4.08390000   |
| C | 11.51230000 | 3.92690000  | 5.27580000   |
| C | 10.79490000 | 4.41080000  | 6.54250000   |
| C | 11.17260000 | 3.53440000  | 7.74390000   |
| C | 10.40630000 | 3.97960000  | 8.99490000   |
| C | 10.79560000 | 3.12520000  | 10.20480000  |
| C | 8.96040000  | 7.41300000  | 2.77390000   |
| C | 8.37950000  | 8.57160000  | 3.58870000   |
| C | 8.54950000  | 8.38680000  | 5.10550000   |
| C | 7.77050000  | 7.18110000  | 5.65410000   |
| C | 7.86310000  | 7.13810000  | 7.18540000   |
| C | 7.07210000  | 5.94910000  | 7.74650000   |
| C | 7.11330000  | 5.95050000  | 9.28030000   |
| C | 6.36700000  | 4.73630000  | 9.84240000   |
| C | 6.39530000  | 8.87840000  | -1.02640000  |
| C | 5.91620000  | 8.77000000  | 0.42540000   |
| C | 4.39840000  | 8.96370000  | 0.53550000   |
| C | 3.95330000  | 8.82940000  | 1.99770000   |
| C | 2.43400000  | 9.00600000  | 2.11890000   |
| C | 1.98860000  | 8.86530000  | 3.58060000   |
| C | 0.46880000  | 9.03670000  | 3.70030000   |
| C | 0.02220000  | 8.89580000  | 5.15870000   |
| H | 11.12720000 | 1.56140000  | -13.20020000 |
| H | 9.84540000  | 4.49020000  | -14.82370000 |
| H | 10.30950000 | 2.84270000  | -14.44220000 |
| H | 9.70520000  | 6.15090000  | -13.19810000 |
| H | 9.64290000  | 6.77410000  | -10.83370000 |
| H | 11.68050000 | -0.04470000 | -11.45970000 |
| H | 11.56390000 | 0.59580000  | -9.10280000  |
| H | 11.12700000 | 4.05340000  | -5.68150000  |
| H | 10.81000000 | 5.73210000  | -6.19830000  |
| H | 8.37040000  | 5.00670000  | -6.55500000  |
| H | 8.79850000  | 3.49630000  | -5.71380000  |
| H | 8.79580000  | 6.29420000  | -4.58740000  |
| H | 10.03400000 | 4.02970000  | -0.88270000  |
| H | 8.09040000  | 7.19220000  | -2.99280000  |
| H | 11.98160000 | 4.77600000  | 0.68730000   |
| H | 11.84710000 | 6.20180000  | 1.75550000   |
| H | 11.39560000 | 3.28980000  | 2.58010000   |
| H | 12.86170000 | 4.22230000  | 2.91590000   |
| H | 11.50070000 | 5.83600000  | 4.27390000   |
| H | 10.06290000 | 4.83780000  | 3.97270000   |
| H | 11.21120000 | 2.89900000  | 5.06360000   |
| H | 12.59230000 | 3.95280000  | 5.43420000   |



|   |             |             |             |
|---|-------------|-------------|-------------|
| H | 11.07300000 | 5.44630000  | 6.74770000  |
| H | 9.71600000  | 4.36160000  | 6.38450000  |
| H | 10.92920000 | 2.49280000  | 7.52490000  |
| H | 12.24590000 | 3.61400000  | 7.92680000  |
| H | 10.62870000 | 5.02700000  | 9.20820000  |
| H | 9.33460000  | 3.87640000  | 8.81730000  |
| H | 10.23480000 | 3.45550000  | 11.08010000 |
| H | 11.86250000 | 3.22810000  | 10.40750000 |
| H | 10.56480000 | 2.07660000  | 10.01170000 |
| H | 10.01030000 | 7.26700000  | 3.02340000  |
| H | 8.39100000  | 6.49890000  | 2.94550000  |
| H | 8.88790000  | 9.49010000  | 3.29080000  |
| H | 7.32090000  | 8.67870000  | 3.34850000  |
| H | 9.60980000  | 8.27150000  | 5.33940000  |
| H | 8.19110000  | 9.29260000  | 5.59840000  |
| H | 6.72250000  | 7.26410000  | 5.35900000  |
| H | 8.18010000  | 6.25630000  | 5.24520000  |
| H | 8.90950000  | 7.04960000  | 7.48420000  |
| H | 7.45770000  | 8.06470000  | 7.59690000  |
| H | 6.03380000  | 6.01450000  | 7.41560000  |
| H | 7.50100000  | 5.01880000  | 7.36990000  |
| H | 8.14960000  | 5.92460000  | 9.62160000  |
| H | 6.64690000  | 6.86320000  | 9.65650000  |
| H | 6.40920000  | 4.75430000  | 10.93210000 |
| H | 6.82890000  | 3.81440000  | 9.48630000  |
| H | 5.32290000  | 4.76070000  | 9.52790000  |
| H | 6.12090000  | 9.85080000  | -1.43700000 |
| H | 5.96370000  | 8.08110000  | -1.63280000 |
| H | 6.18180000  | 7.78640000  | 0.81550000  |
| H | 6.42740000  | 9.52870000  | 1.02050000  |
| H | 4.12990000  | 9.95460000  | 0.16350000  |
| H | 3.89150000  | 8.20810000  | -0.06810000 |
| H | 4.23350000  | 7.84270000  | 2.37250000  |
| H | 4.45550000  | 9.58860000  | 2.60090000  |
| H | 2.15360000  | 9.99390000  | 1.74860000  |
| H | 1.93240000  | 8.24790000  | 1.51420000  |
| H | 2.27140000  | 7.87850000  | 3.95210000  |
| H | 2.48740000  | 9.62470000  | 4.18600000  |
| H | 0.18190000  | 10.02370000 | 3.33140000  |
| H | -0.03360000 | 8.27780000  | 3.09710000  |
| H | -1.05930000 | 9.02230000  | 5.22350000  |
| H | 0.50500000  | 9.65730000  | 5.77280000  |
| H | 0.28620000  | 7.90720000  | 5.53670000  |

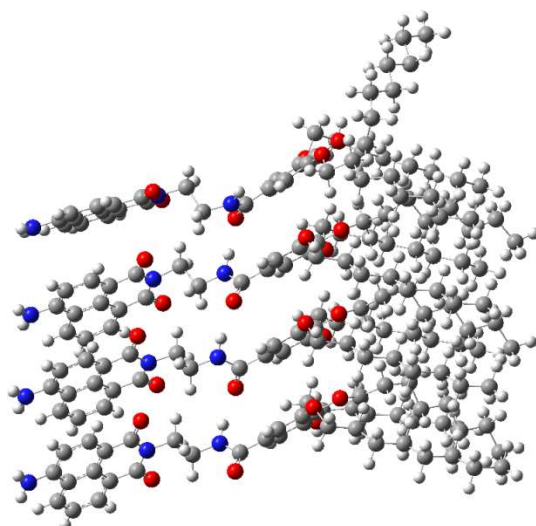

Energy = -9541.13681 Hartree

|   |            |            |             |
|---|------------|------------|-------------|
| C | 4.62500000 | 5.62400000 | 4.93700000  |
| C | 5.36600000 | 4.47600000 | 4.71600000  |
| C | 5.94900000 | 3.75100000 | 5.80100000  |
| C | 5.73600000 | 4.23600000 | 7.11700000  |
| C | 4.96100000 | 5.40600000 | 7.33500000  |
| C | 4.42200000 | 6.08200000 | 6.24200000  |
| C | 6.71300000 | 2.56900000 | 5.62300000  |
| C | 7.23200000 | 1.89500000 | 6.70600000  |
| C | 7.02100000 | 2.37900000 | 8.00500000  |
| C | 6.28800000 | 3.53800000 | 8.22200000  |
| C | 6.06300000 | 4.04200000 | 9.57200000  |
| N | 5.31000000 | 5.20200000 | 9.77700000  |
| C | 4.74700000 | 5.88000000 | 8.69300000  |
| O | 4.09500000 | 6.89200000 | 8.95600000  |
| O | 6.52200000 | 3.48200000 | 10.56400000 |
| N | 5.54259800 | 4.00347000 | 3.43217100  |
| C | 5.10000000 | 5.71900000 | 11.15800000 |
| C | 3.67500000 | 5.32000000 | 11.60000000 |
| N | 3.58300000 | 5.67700000 | 13.03000000 |
| C | 4.11200000 | 4.88500000 | 14.01500000 |
| C | 4.41300000 | 5.45700000 | 15.32900000 |
| O | 4.36100000 | 3.71800000 | 13.72300000 |
| C | 5.40800000 | 4.85400000 | 16.10800000 |
| C | 5.75300000 | 5.37200000 | 17.34800000 |
| C | 5.10500000 | 6.51400000 | 17.84800000 |
| C | 4.12300000 | 7.13600000 | 17.06000000 |
| C | 3.76200000 | 6.60000000 | 15.82200000 |
| O | 3.52800000 | 8.31300000 | 17.48500000 |
| O | 5.44900000 | 6.98800000 | 19.10300000 |
| O | 6.72200000 | 4.65600000 | 18.03000000 |
| C | 7.81600000 | 5.19500000 | 18.81800000 |
| C | 7.91100000 | 4.29400000 | 20.05400000 |
| C | 6.71900000 | 4.51500000 | 20.99500000 |
| C | 6.84500000 | 3.67000000 | 22.26700000 |
| C | 5.71800000 | 4.02500000 | 23.24500000 |
| C | 5.84300000 | 3.19800000 | 24.53100000 |

|   |             |             |             |
|---|-------------|-------------|-------------|
| C | 4.72800000  | 3.57400000  | 25.51200000 |
| C | 4.82800000  | 2.74800000  | 26.79700000 |
| C | 4.55500000  | 7.43200000  | 20.17300000 |
| C | 4.92900000  | 8.89500000  | 20.46700000 |
| C | 6.40700000  | 9.14300000  | 20.83400000 |
| C | 6.80800000  | 8.60400000  | 22.21900000 |
| C | 8.32400000  | 8.82700000  | 22.36300000 |
| C | 8.67000000  | 8.25000000  | 23.74700000 |
| C | 10.16700000 | 8.59000000  | 23.80500000 |
| C | 10.59000000 | 8.09200000  | 25.18800000 |
| C | 2.12900000  | 8.58800000  | 17.25400000 |
| C | 1.71600000  | 9.56500000  | 18.35800000 |
| C | 0.19600000  | 9.79000000  | 18.32500000 |
| C | -0.32900000 | 10.24900000 | 19.69200000 |
| C | -1.85800000 | 10.38500000 | 19.65700000 |
| C | -2.41300000 | 10.62400000 | 21.06800000 |
| C | -3.94300000 | 10.73400000 | 21.03500000 |
| C | -4.50500000 | 10.88400000 | 22.45200000 |
| H | 6.88800000  | 2.19800000  | 4.64700000  |
| H | 5.13808200  | 4.49596500  | 2.65902100  |
| H | 6.08312900  | 3.18142900  | 3.26232500  |
| H | 4.21100000  | 6.15500000  | 4.11900000  |
| H | 3.84900000  | 6.96100000  | 6.40200000  |
| H | 7.79900000  | 1.01000000  | 6.56400000  |
| H | 7.43100000  | 1.85100000  | 8.82900000  |
| H | 5.81000000  | 5.27900000  | 11.84500000 |
| H | 5.17500000  | 6.79800000  | 11.16100000 |
| H | 2.93100000  | 5.86900000  | 11.01900000 |
| H | 3.51600000  | 4.25300000  | 11.45300000 |
| H | 3.40400000  | 6.66300000  | 13.25900000 |
| H | 5.90900000  | 3.99100000  | 15.75100000 |
| H | 2.99500000  | 7.05900000  | 15.25700000 |
| H | 8.74000000  | 5.13000000  | 18.24400000 |
| H | 7.65400000  | 6.23000000  | 19.11400000 |
| H | 7.95200000  | 3.25000000  | 19.74300000 |
| H | 8.82800000  | 4.54300000  | 20.59000000 |
| H | 6.69500000  | 5.56900000  | 21.27400000 |
| H | 5.78400000  | 4.27600000  | 20.48400000 |
| H | 6.79500000  | 2.61200000  | 22.01000000 |
| H | 7.80500000  | 3.88400000  | 22.74300000 |
| H | 5.78200000  | 5.08800000  | 23.49300000 |
| H | 4.75000000  | 3.84100000  | 22.77600000 |
| H | 5.77400000  | 2.13700000  | 24.28700000 |
| H | 6.81200000  | 3.39800000  | 24.99200000 |
| H | 4.80100000  | 4.63600000  | 25.75500000 |
| H | 3.76000000  | 3.39600000  | 25.04100000 |
| H | 4.01300000  | 3.01900000  | 27.46800000 |
| H | 5.77900000  | 2.94800000  | 27.29200000 |
| H | 4.75900000  | 1.68500000  | 26.56300000 |
| H | 4.69500000  | 6.82000000  | 21.06500000 |
| H | 3.51000000  | 7.36200000  | 19.87000000 |
| H | 4.69700000  | 9.48000000  | 19.57800000 |
| H | 4.29500000  | 9.25100000  | 21.27900000 |
| H | 7.04600000  | 8.69400000  | 20.07200000 |
| H | 6.58700000  | 10.21900000 | 20.82600000 |
| H | 6.28100000  | 9.14100000  | 23.00800000 |

|   |             |             |             |
|---|-------------|-------------|-------------|
| H | 6.59300000  | 7.54200000  | 22.30900000 |
| H | 8.83300000  | 8.25300000  | 21.59800000 |
| H | 8.53500000  | 9.88900000  | 22.31600000 |
| H | 8.32100000  | 9.07300000  | 24.32200000 |
| H | 1.05200000  | 7.15400000  | 21.94600000 |
| H | 10.70600000 | 8.02300000  | 23.05500000 |
| H | 10.33700000 | 9.65900000  | 23.74100000 |
| H | 10.01500000 | 8.64100000  | 25.93400000 |
| H | 11.65600000 | 8.27000000  | 25.30900000 |
| H | 1.97800000  | 9.03100000  | 16.27000000 |
| H | 1.55300000  | 7.66700000  | 17.34700000 |
| H | 2.00500000  | 9.13600000  | 19.31900000 |
| H | 2.24300000  | 10.51200000 | 18.23600000 |
| H | -0.05200000 | 10.52400000 | 17.55800000 |
| H | -0.29500000 | 8.84900000  | 18.07800000 |
| H | -0.05400000 | 9.50100000  | 20.44100000 |
| H | 0.12400000  | 11.20300000 | 19.96600000 |
| H | -2.13600000 | 11.21300000 | 19.00400000 |
| H | -2.29100000 | 9.46300000  | 19.26300000 |
| H | -2.12500000 | 9.78700000  | 21.70800000 |
| H | -1.98700000 | 11.54200000 | 21.47700000 |
| H | -4.23500000 | 11.59800000 | 20.43500000 |
| H | -4.36200000 | 9.83400000  | 20.58200000 |
| H | -5.59200000 | 10.95800000 | 22.40800000 |
| H | -4.10400000 | 11.78400000 | 22.91900000 |
| H | -4.23400000 | 10.01400000 | 23.05300000 |
| C | 3.33800000  | 1.47100000  | 4.72200000  |
| C | 3.60100000  | 0.13200000  | 4.49200000  |
| C | 3.72700000  | -0.79000000 | 5.57700000  |
| C | 3.70800000  | -0.27200000 | 6.89700000  |
| C | 3.49900000  | 1.11400000  | 7.12000000  |
| C | 3.27500000  | 1.95300000  | 6.03100000  |
| C | 3.85600000  | -2.18900000 | 5.39300000  |
| C | 3.99400000  | -3.03100000 | 6.47400000  |
| C | 4.00900000  | -2.51100000 | 7.77800000  |
| C | 3.87700000  | -1.14700000 | 8.00000000  |
| C | 3.89800000  | -0.59800000 | 9.35000000  |
| N | 3.80800000  | 0.78000000  | 9.55000000  |
| C | 3.53300000  | 1.63400000  | 8.47600000  |
| O | 3.35100000  | 2.82100000  | 8.74500000  |
| O | 3.98000000  | -1.30100000 | 10.35200000 |
| N | 3.66770100  | -0.30139600 | 3.20515200  |
| C | 3.88500000  | 1.33000000  | 10.93300000 |
| C | 2.44000000  | 1.28400000  | 11.44500000 |
| N | 2.35000000  | 2.01500000  | 12.70500000 |
| C | 1.15500000  | 2.49400000  | 13.15600000 |
| C | 1.13000000  | 3.21200000  | 14.42400000 |
| O | 0.16200000  | 2.30100000  | 12.45800000 |
| C | 1.71900000  | 2.66100000  | 15.57200000 |
| C | 1.68700000  | 3.35000000  | 16.78100000 |
| C | 1.08500000  | 4.61600000  | 16.86100000 |
| C | 0.51200000  | 5.16400000  | 15.70500000 |
| C | 0.51800000  | 4.46800000  | 14.50300000 |
| O | -0.06000000 | 6.41900000  | 15.72000000 |
| O | 1.00500000  | 5.36900000  | 18.02400000 |
| O | 2.23300000  | 2.71600000  | 17.87100000 |

|   |             |             |             |
|---|-------------|-------------|-------------|
| C | 3.63800000  | 2.86700000  | 18.16900000 |
| C | 3.93800000  | 1.85700000  | 19.28200000 |
| C | 3.10400000  | 2.12100000  | 20.54500000 |
| C | 3.44200000  | 1.11400000  | 21.64900000 |
| C | 2.53400000  | 1.35500000  | 22.86000000 |
| C | 2.85000000  | 0.35700000  | 23.98100000 |
| C | 1.94200000  | 0.60600000  | 25.18900000 |
| C | 2.22100000  | -0.40900000 | 26.30100000 |
| C | 1.50900000  | 5.16900000  | 19.37100000 |
| C | 0.83100000  | 6.25400000  | 20.21900000 |
| C | 1.57000000  | 6.30400000  | 21.58100000 |
| C | 0.79500000  | 5.26100000  | 22.40100000 |
| C | 1.32700000  | 5.40200000  | 23.83300000 |
| C | 0.51500000  | 4.42200000  | 24.69700000 |
| C | 0.89400000  | 4.53600000  | 26.17800000 |
| C | 0.03500000  | 3.59400000  | 27.02900000 |
| C | -1.50400000 | 6.53800000  | 15.77800000 |
| C | -1.89400000 | 6.26200000  | 17.23200000 |
| C | -3.32000000 | 6.72500000  | 17.55100000 |
| C | -3.60400000 | 6.50700000  | 19.04300000 |
| C | -5.01700000 | 6.98000000  | 19.40500000 |
| C | -5.26000000 | 6.81100000  | 20.91000000 |
| C | -6.67000000 | 7.28100000  | 21.28700000 |
| C | -6.90800000 | 7.10900000  | 22.79000000 |
| H | 3.82900000  | -2.59800000 | 4.41600000  |
| H | 3.52681100  | 0.34997300  | 2.45454600  |
| H | 3.92460500  | -1.23124500 | 2.99120900  |
| H | 3.19900000  | 2.13700000  | 3.91000000  |
| H | 3.07300000  | 2.98200000  | 6.19700000  |
| H | 4.08400000  | -4.07800000 | 6.32800000  |
| H | 4.11700000  | -3.17300000 | 8.60100000  |
| H | 4.51000000  | 0.71500000  | 11.56600000 |
| H | 4.23000000  | 2.35200000  | 10.91700000 |
| H | 1.78400000  | 1.74700000  | 10.70400000 |
| H | 2.14800000  | 0.24700000  | 11.61200000 |
| H | 3.21400000  | 2.40000000  | 13.14300000 |
| H | 2.17800000  | 1.70800000  | 15.52500000 |
| H | 0.06500000  | 4.89000000  | 13.64500000 |
| H | 4.23800000  | 2.64000000  | 17.28800000 |
| H | 3.85100000  | 3.87800000  | 18.51300000 |
| H | 3.73100000  | 0.85300000  | 18.91200000 |
| H | 4.99700000  | 1.93000000  | 19.53200000 |
| H | 3.29400000  | 3.13600000  | 20.90300000 |
| H | 2.04300000  | 2.03800000  | 20.30500000 |
| H | 3.29200000  | 0.09900000  | 21.27800000 |
| H | 4.48600000  | 1.23900000  | 21.94500000 |
| H | 2.68200000  | 2.37400000  | 23.22000000 |
| H | 1.49200000  | 1.24500000  | 22.55700000 |
| H | 2.69700000  | -0.65900000 | 23.61300000 |
| H | 3.89300000  | 0.47100000  | 24.28300000 |
| H | 2.11500000  | 1.61400000  | 25.57100000 |
| H | 0.89900000  | 0.52400000  | 24.88300000 |
| H | 1.54800000  | -0.22600000 | 27.13900000 |
| H | 3.25200000  | -0.31300000 | 26.64400000 |
| H | 2.06100000  | -1.42100000 | 25.92900000 |
| H | 2.58600000  | 5.31700000  | 19.40400000 |

|   |             |             |             |
|---|-------------|-------------|-------------|
| H | 1.24300000  | 4.18500000  | 19.74700000 |
| H | 0.99900000  | 7.19500000  | 19.72400000 |
| H | -0.22800000 | 6.04700000  | 20.30000000 |
| H | -0.26500000 | 5.48700000  | 22.40800000 |
| H | 1.03900000  | 4.27000000  | 22.04600000 |
| H | 2.39100000  | 5.16200000  | 23.85200000 |
| H | -0.54700000 | 4.64600000  | 24.58500000 |
| H | 0.69600000  | 3.40400000  | 24.34900000 |
| H | 1.94800000  | 4.28500000  | 26.30500000 |
| H | 0.74000000  | 5.56400000  | 26.51000000 |
| H | 0.32800000  | 3.67900000  | 28.07500000 |
| H | 0.17200000  | 2.56300000  | 26.70300000 |
| H | -1.01800000 | 3.86300000  | 26.93200000 |
| H | -1.78900000 | 7.55300000  | 15.50100000 |
| H | -1.98200000 | 5.81800000  | 15.11200000 |
| H | -1.80200000 | 5.19200000  | 17.41800000 |
| H | -1.19900000 | 6.78100000  | 17.89200000 |
| H | -3.41700000 | 7.78700000  | 17.31900000 |
| H | -4.03200000 | 6.16000000  | 16.95000000 |
| H | -3.50100000 | 5.44800000  | 19.28200000 |
| H | -2.87300000 | 7.06200000  | 19.63500000 |
| H | -5.12700000 | 8.03200000  | 19.13600000 |
| H | -5.74900000 | 6.39500000  | 18.84800000 |
| H | -5.14100000 | 5.75900000  | 21.17800000 |
| H | -4.52200000 | 7.39600000  | 21.46300000 |
| H | -6.78600000 | 8.33400000  | 21.02300000 |
| H | -7.41000000 | 6.69600000  | 20.73700000 |
| H | -7.92000000 | 7.43200000  | 23.03900000 |
| H | -6.19400000 | 7.71300000  | 23.35100000 |
| H | -6.79100000 | 6.06100000  | 23.06900000 |
| C | 0.13000000  | -0.77800000 | 3.67500000  |
| C | 0.35300000  | -2.12200000 | 3.42500000  |
| C | 0.53600000  | -3.05200000 | 4.49500000  |
| C | 0.51600000  | -2.55100000 | 5.82200000  |
| C | 0.33900000  | -1.16500000 | 6.06100000  |
| C | 0.13300000  | -0.30300000 | 4.98700000  |
| C | 0.72900000  | -4.44200000 | 4.29400000  |
| C | 0.87800000  | -5.29600000 | 5.36400000  |
| C | 0.84800000  | -4.79700000 | 6.67500000  |
| C | 0.67100000  | -3.44100000 | 6.91600000  |
| C | 0.62000000  | -2.91700000 | 8.27600000  |
| N | 0.42500000  | -1.55300000 | 8.49800000  |
| C | 0.38800000  | -0.66500000 | 7.42100000  |
| O | 0.43300000  | 0.53400000  | 7.69100000  |
| O | 0.74300000  | -3.63600000 | 9.26200000  |
| N | 0.36065600  | -2.56158400 | 2.14463900  |
| C | 0.27300000  | -1.02200000 | 9.88000000  |
| C | -1.19800000 | -0.60000000 | 10.06900000 |
| N | -1.29300000 | -0.02100000 | 11.41900000 |
| C | -1.57200000 | -0.74400000 | 12.54300000 |
| C | -1.62000000 | -0.03500000 | 13.82300000 |
| O | -1.73900000 | -1.95700000 | 12.41800000 |
| C | -1.03800000 | -0.60300000 | 14.96500000 |
| C | -1.04700000 | 0.08200000  | 16.17800000 |
| C | -1.61300000 | 1.36500000  | 16.26800000 |
| C | -2.21600000 | 1.91600000  | 15.13100000 |

|   |             |             |             |
|---|-------------|-------------|-------------|
| C | -2.22900000 | 1.22600000  | 13.92400000 |
| O | -2.79800000 | 3.17100000  | 15.17700000 |
| O | -1.60900000 | 2.13800000  | 17.42100000 |
| O | -0.50900000 | -0.56100000 | 17.27000000 |
| C | 0.91900000  | -0.58000000 | 17.47000000 |
| C | 1.16400000  | -1.58600000 | 18.60400000 |
| C | 0.45200000  | -1.20100000 | 19.91300000 |
| C | 0.76300000  | -2.21200000 | 21.02400000 |
| C | -0.04900000 | -1.89200000 | 22.28600000 |
| C | 0.26700000  | -2.89600000 | 23.40200000 |
| C | -0.59200000 | -2.61300000 | 24.64000000 |
| C | -0.26900000 | -3.59500000 | 25.77000000 |
| C | -1.16300000 | 1.82200000  | 18.75000000 |
| C | -1.66300000 | 2.98500000  | 19.60600000 |
| C | -1.31700000 | 2.83700000  | 21.09200000 |
| C | -2.11400000 | 1.72900000  | 21.78500000 |
| C | -1.85600000 | 1.73800000  | 23.29600000 |
| C | -2.70400000 | 0.66300000  | 23.98800000 |
| C | -2.48900000 | 0.68900000  | 25.50700000 |
| C | -3.36100000 | -0.37000000 | 26.19000000 |
| C | -4.23000000 | 3.30700000  | 15.36300000 |
| C | -4.48900000 | 3.08600000  | 16.85800000 |
| C | -5.90300000 | 3.49200000  | 17.29100000 |
| C | -6.07100000 | 3.22500000  | 18.79400000 |
| C | -7.47000000 | 3.61900000  | 19.28200000 |
| C | -7.60100000 | 3.34600000  | 20.78700000 |
| C | -8.99600000 | 3.73500000  | 21.29000000 |
| C | -9.12600000 | 3.45800000  | 22.79000000 |
| H | 0.75900000  | -4.83200000 | 3.30900000  |
| H | 0.24206200  | -1.90255400 | 1.39150700  |
| H | 0.51558500  | -3.52642600 | 1.92847400  |
| H | -0.03900000 | -0.10800000 | 2.87300000  |
| H | -0.01700000 | 0.73200000  | 5.16800000  |
| H | 1.01600000  | -6.33600000 | 5.20300000  |
| H | 0.96000000  | -5.46800000 | 7.49000000  |
| H | 0.52000000  | -1.76100000 | 10.63100000 |
| H | 0.88000000  | -0.13900000 | 9.97500000  |
| H | -1.47800000 | 0.15100000  | 9.32900000  |
| H | -1.85900000 | -1.46000000 | 9.96500000  |
| H | -0.94200000 | 0.95000000  | 11.57200000 |
| H | -0.59000000 | -1.55800000 | 14.89900000 |
| H | -2.68600000 | 1.66800000  | 13.07700000 |
| H | 1.42600000  | -0.90800000 | 16.56100000 |
| H | 1.27600000  | 0.40800000  | 17.75600000 |
| H | 0.81600000  | -2.56800000 | 18.28000000 |
| H | 2.23800000  | -1.64300000 | 18.78600000 |
| H | 0.77300000  | -0.20600000 | 20.22600000 |
| H | -0.62600000 | -1.18300000 | 19.74500000 |
| H | 0.51000000  | -3.21700000 | 20.68300000 |
| H | 1.82900000  | -2.17600000 | 21.25900000 |
| H | 0.18900000  | -0.88300000 | 22.62800000 |
| H | -1.11300000 | -1.93800000 | 22.05000000 |
| H | 0.06600000  | -3.90900000 | 23.04900000 |
| H | 1.32300000  | -2.82200000 | 23.66800000 |
| H | -0.40600000 | -1.59600000 | 24.98700000 |
| H | -1.64600000 | -2.70500000 | 24.37800000 |

|   |              |             |             |
|---|--------------|-------------|-------------|
| H | -0.90400000  | -3.38300000 | 26.63100000 |
| H | 0.77500000   | -3.49500000 | 26.06800000 |
| H | -0.44800000  | -4.61900000 | 25.44200000 |
| H | -0.07600000  | 1.77800000  | 18.78400000 |
| H | -1.60500000  | 0.88400000  | 19.08000000 |
| H | -1.19900000  | 3.89900000  | 19.23600000 |
| H | -2.74300000  | 3.07900000  | 19.49300000 |
| H | -0.24900000  | 2.64100000  | 21.19600000 |
| H | -1.54300000  | 3.78600000  | 21.58000000 |
| H | -3.17600000  | 1.89900000  | 21.60300000 |
| H | -1.82100000  | 0.76300000  | 21.37600000 |
| H | -0.79900000  | 1.55100000  | 23.48400000 |
| H | -2.11400000  | 2.71900000  | 23.70100000 |
| H | -3.75800000  | 0.84400000  | 23.77300000 |
| H | -2.43000000  | -0.31800000 | 23.59900000 |
| H | -1.43900000  | 0.49600000  | 25.73300000 |
| H | -2.75100000  | 1.67500000  | 25.89600000 |
| H | -3.18800000  | -0.34500000 | 27.26700000 |
| H | -3.11200000  | -1.36300000 | 25.81600000 |
| H | -4.41500000  | -0.16800000 | 25.99600000 |
| H | -4.53400000  | 4.31400000  | 15.08000000 |
| H | -4.76900000  | 2.57300000  | 14.76400000 |
| H | -4.32900000  | 2.03000000  | 17.08300000 |
| H | -3.76700000  | 3.67500000  | 17.42200000 |
| H | -6.05500000  | 4.55400000  | 17.09000000 |
| H | -6.63800000  | 2.91600000  | 16.72900000 |
| H | -5.90700000  | 2.16500000  | 18.99200000 |
| H | -5.32400000  | 3.79700000  | 19.34700000 |
| H | -7.63600000  | 4.68100000  | 19.09000000 |
| H | -8.22000000  | 3.04100000  | 18.74100000 |
| H | -7.43000000  | 2.28500000  | 20.97800000 |
| H | -6.84800000  | 3.92400000  | 21.32700000 |
| H | -9.16900000  | 4.79700000  | 21.10500000 |
| H | -9.75200000  | 3.16000000  | 20.75300000 |
| H | -10.13100000 | 3.72100000  | 23.12500000 |
| H | -8.40100000  | 4.05300000  | 23.34500000 |
| H | -8.95300000  | 2.40000000  | 22.99200000 |
| C | -3.00700000  | -3.33800000 | 3.17500000  |
| C | -3.03800000  | -4.66100000 | 2.76800000  |
| C | -2.86600000  | -5.72600000 | 3.70500000  |
| C | -2.73200000  | -5.39200000 | 5.07700000  |
| C | -2.71200000  | -4.03300000 | 5.48500000  |
| C | -2.84400000  | -3.02900000 | 4.52800000  |
| C | -2.81600000  | -7.09100000 | 3.32500000  |
| C | -2.67500000  | -8.08100000 | 4.27300000  |
| C | -2.57800000  | -7.74800000 | 5.63200000  |
| C | -2.60900000  | -6.42300000 | 6.04500000  |
| C | -2.52300000  | -6.07200000 | 7.45700000  |
| N | -2.48500000  | -4.73200000 | 7.84800000  |
| C | -2.54100000  | -3.71200000 | 6.89200000  |
| O | -2.42400000  | -2.55800000 | 7.30400000  |
| O | -2.48400000  | -6.91900000 | 8.34300000  |
| N | -3.19241700  | -4.95967600 | 1.44703100  |
| C | -2.41700000  | -4.38300000 | 9.29900000  |
| C | -3.85100000  | -4.02200000 | 9.72000000  |
| N | -3.80300000  | -3.59000000 | 11.12000000 |



|   |              |             |             |
|---|--------------|-------------|-------------|
| C | -4.93800000  | -3.21300000 | 11.77600000 |
| C | -4.80800000  | -2.65300000 | 13.11500000 |
| O | -6.01200000  | -3.34600000 | 11.19900000 |
| C | -4.10500000  | -3.34300000 | 14.11500000 |
| C | -3.99000000  | -2.80400000 | 15.39300000 |
| C | -4.54700000  | -1.54800000 | 15.68900000 |
| C | -5.26600000  | -0.87800000 | 14.69000000 |
| C | -5.39700000  | -1.42000000 | 13.41700000 |
| O | -5.88200000  | 0.32800000  | 14.94500000 |
| O | -4.43700000  | -0.92100000 | 16.92700000 |
| O | -3.35700000  | -3.57200000 | 16.34600000 |
| C | -1.92200000  | -3.71300000 | 16.32300000 |
| C | -1.58600000  | -4.81200000 | 17.34000000 |
| C | -2.05300000  | -4.46200000 | 18.76300000 |
| C | -1.63100000  | -5.54200000 | 19.76600000 |
| C | -2.25800000  | -5.26500000 | 21.13900000 |
| C | -1.83200000  | -6.33100000 | 22.15700000 |
| C | -2.52600000  | -6.09300000 | 23.50300000 |
| C | -2.08000000  | -7.12800000 | 24.54100000 |
| C | -4.00500000  | -1.49600000 | 18.17200000 |
| C | -4.44300000  | -0.48800000 | 19.23700000 |
| C | -4.09700000  | -0.92500000 | 20.66700000 |
| C | -4.90900000  | -2.13300000 | 21.15300000 |
| C | -4.62900000  | -2.37800000 | 22.64300000 |
| C | -5.47600000  | -3.53800000 | 23.18000000 |
| C | -5.23100000  | -3.72900000 | 24.68300000 |
| C | -6.05100000  | -4.90600000 | 25.22000000 |
| C | -7.29700000  | 0.35200000  | 15.25600000 |
| C | -7.40400000  | -0.01900000 | 16.73800000 |
| C | -8.80400000  | 0.22300000  | 17.31300000 |
| C | -8.80500000  | -0.11100000 | 18.81100000 |
| C | -10.16400000 | 0.20900000  | 19.44500000 |
| C | -10.13500000 | -0.09400000 | 20.94900000 |
| C | -11.46700000 | 0.28900000  | 21.60500000 |
| C | -11.43700000 | -0.02400000 | 23.10500000 |
| H | -2.88200000  | -7.36000000 | 2.30300000  |
| H | -3.30291500  | -4.22532400 | 0.77677900  |
| H | -3.23414900  | -5.91601500 | 1.14185300  |
| H | -3.10500000  | -2.55700000 | 2.46500000  |
| H | -2.81700000  | -2.01100000 | 4.82800000  |
| H | -2.64100000  | -9.10100000 | 3.98100000  |
| H | -2.48100000  | -8.52400000 | 6.35100000  |
| H | -2.07600000  | -5.21800000 | 9.89700000  |
| H | -1.78600000  | -3.52200000 | 9.44600000  |
| H | -4.23200000  | -3.20800000 | 9.10100000  |
| H | -4.50100000  | -4.89300000 | 9.61600000  |
| H | -2.90900000  | -3.23200000 | 11.51800000 |
| H | -3.67400000  | -4.28600000 | 13.90000000 |
| H | -5.94100000  | -0.89800000 | 12.67200000 |
| H | -1.58200000  | -4.00200000 | 15.32700000 |
| H | -1.45400000  | -2.77900000 | 16.62400000 |
| H | -2.06300000  | -5.74000000 | 17.02000000 |
| H | -0.50500000  | -4.96000000 | 17.34200000 |
| H | -1.62800000  | -3.50300000 | 19.06400000 |
| H | -3.14100000  | -4.38100000 | 18.77000000 |
| H | -1.96700000  | -6.51800000 | 19.41000000 |

|   |              |             |             |
|---|--------------|-------------|-------------|
| H | -0.54300000  | -5.55400000 | 19.85400000 |
| H | -1.94700000  | -4.28100000 | 21.49100000 |
| H | -3.34600000  | -5.27400000 | 21.04300000 |
| H | -2.10300000  | -7.32000000 | 21.78300000 |
| H | -0.75000000  | -6.29100000 | 22.29200000 |
| H | -2.28400000  | -5.09400000 | 23.86500000 |
| H | -3.60700000  | -6.16500000 | 23.37200000 |
| H | -2.57900000  | -6.93100000 | 25.49100000 |
| H | -1.00100000  | -7.07000000 | 24.68900000 |
| H | -2.34400000  | -8.13100000 | 24.20400000 |
| H | -2.92100000  | -1.61100000 | 18.17700000 |
| H | -4.50100000  | -2.45300000 | 18.33100000 |
| H | -3.95000000  | 0.46200000  | 19.02800000 |
| H | -5.51900000  | -0.33700000 | 19.16000000 |
| H | -3.03200000  | -1.15400000 | 20.72800000 |
| H | -4.31000000  | -0.08600000 | 21.32900000 |
| H | -5.97300000  | -1.93300000 | 21.01300000 |
| H | -4.63700000  | -3.02100000 | 20.58000000 |
| H | -3.57200000  | -2.60800000 | 22.78000000 |
| H | -4.86900000  | -1.47600000 | 23.20800000 |
| H | -6.53300000  | -3.32400000 | 23.01200000 |
| H | -5.21600000  | -4.45300000 | 22.64500000 |
| H | -4.17100000  | -3.91700000 | 24.86500000 |
| H | -5.51800000  | -2.82100000 | 25.21800000 |
| H | -5.86100000  | -5.02700000 | 26.28800000 |
| H | -5.76900000  | -5.82500000 | 24.70600000 |
| H | -7.11500000  | -4.72000000 | 25.06900000 |
| H | -7.68400000  | 1.35800000  | 15.09400000 |
| H | -7.84400000  | -0.36300000 | 14.63900000 |
| H | -7.14000000  | -1.07000000 | 16.86100000 |
| H | -6.68300000  | 0.58100000  | 17.29200000 |
| H | -9.07700000  | 1.27100000  | 17.17300000 |
| H | -9.52900000  | -0.40700000 | 16.79400000 |
| H | -8.57900000  | -1.17000000 | 18.94700000 |
| H | -8.03200000  | 0.47500000  | 19.31200000 |
| H | -10.39400000 | 1.26500000  | 19.29200000 |
| H | -10.94000000 | -0.39300000 | 18.96700000 |
| H | -9.94800000  | -1.15900000 | 21.09900000 |
| H | -9.32800000  | 0.47200000  | 21.41700000 |
| H | -11.65000000 | 1.35700000  | 21.46600000 |
| H | -12.28000000 | -0.27000000 | 21.13800000 |
| H | -12.38800000 | 0.25900000  | 23.55700000 |
| H | -10.63600000 | 0.53700000  | 23.58800000 |
| H | -11.27400000 | -1.09100000 | 23.26000000 |
| H | 10.36100000  | 7.02900000  | 25.24400000 |
| H | 1.17900000   | 6.42700000  | 24.17400000 |

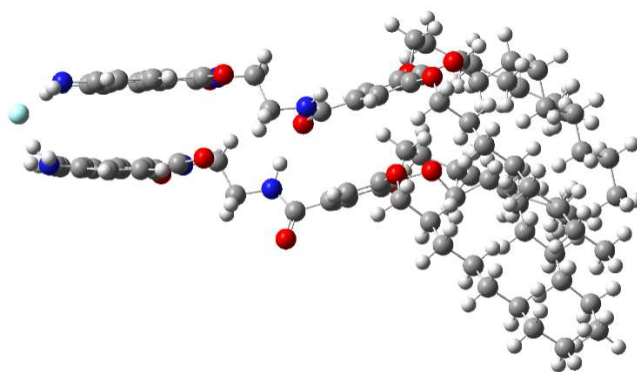

Energy = -4842.62495 Hartree

|   |             |             |             |
|---|-------------|-------------|-------------|
| C | 10.56557830 | 2.55706770  | -0.98865637 |
| C | 11.48368749 | 1.70692413  | -1.57908924 |
| C | 11.07381627 | 0.50567236  | -2.23232288 |
| C | 9.69784345  | 0.18168956  | -2.22349097 |
| C | 8.78105651  | 1.00178240  | -1.51982796 |
| C | 9.21768574  | 2.19568039  | -0.94880413 |
| C | 11.98000786 | -0.37581560 | -2.86973787 |
| C | 11.52836889 | -1.49799202 | -3.52855845 |
| C | 10.15611492 | -1.79339219 | -3.55699293 |
| C | 9.24245859  | -0.97769917 | -2.90230238 |
| C | 7.82077126  | -1.29659280 | -2.88334021 |
| N | 6.95404079  | -0.56826931 | -2.06630556 |
| C | 7.41041489  | 0.55880016  | -1.37266795 |
| O | 6.60999424  | 1.12158984  | -0.62728951 |
| O | 7.33264843  | -2.19900297 | -3.55751696 |
| N | 12.81546444 | 2.00893135  | -1.47685443 |
| C | 5.53755950  | -0.99888234 | -1.91071098 |
| C | 4.69158510  | -0.03403576 | -2.75965683 |
| N | 3.30791002  | -0.17155669 | -2.30278342 |
| C | 2.36417969  | 0.76049556  | -2.61245597 |
| C | 1.07496768  | 0.66040549  | -1.94667654 |
| O | 2.64874897  | 1.64004923  | -3.41642194 |
| C | 0.18830624  | -0.37200254 | -2.28232323 |
| C | -1.03690049 | -0.47475009 | -1.63665534 |
| C | -1.40246792 | 0.45441764  | -0.65274415 |
| C | -0.50595982 | 1.47142988  | -0.30547022 |
| C | 0.72158835  | 1.58244441  | -0.95156800 |
| O | -0.82916908 | 2.37496790  | 0.68708998  |
| O | -2.64617195 | 0.40387481  | -0.05668047 |
| O | -1.86487935 | -1.51226863 | -2.00683965 |
| C | -2.11481890 | -2.55352020 | -1.03718307 |
| C | -3.00150949 | -3.58409493 | -1.74157462 |
| C | -4.45060216 | -3.09599645 | -1.88793594 |
| C | -5.28602156 | -4.13814665 | -2.64100567 |
| C | -6.75335778 | -3.70179272 | -2.73074141 |
| C | -7.55751886 | -4.71806057 | -3.55218163 |
| C | -9.03800800 | -4.32361634 | -3.61068474 |
| C | -9.83353005 | -5.33062452 | -4.44685640 |
| C | -3.77413891 | 0.70521898  | -0.90461065 |
| C | -5.00621656 | 0.39578539  | -0.05690954 |
| C | -6.32514453 | 0.66878033  | -0.79458761 |
| C | -6.52921703 | 2.15521945  | -1.12306533 |

|   |              |             |             |
|---|--------------|-------------|-------------|
| C | -7.88638125  | 2.37272634  | -1.80218467 |
| C | -8.10051171  | 3.86112774  | -2.10532553 |
| C | -9.43110689  | 4.07325179  | -2.83722595 |
| C | -9.66056757  | 5.56093284  | -3.11784892 |
| C | -0.92884085  | 3.79038548  | 0.40718856  |
| C | -2.27973299  | 3.96729007  | -0.29201149 |
| C | -2.68166571  | 5.44198861  | -0.40421308 |
| C | -4.06671489  | 5.56119240  | -1.05479088 |
| C | -4.52091248  | 7.02562439  | -1.07938423 |
| C | -5.91789088  | 7.15310647  | -1.70059448 |
| C | -6.37407194  | 8.61776760  | -1.69066735 |
| C | -7.78107196  | 8.75577809  | -2.27914137 |
| H | 13.02163232  | -0.17125659 | -2.81970634 |
| H | 13.06220375  | 2.71099017  | -0.77648806 |
| H | 13.41886324  | 1.13564956  | -1.29394741 |
| H | 10.89311573  | 3.45716515  | -0.53931843 |
| H | 8.52411053   | 2.82954725  | -0.45724506 |
| H | 12.21963530  | -2.14489314 | -4.00581132 |
| H | 9.82137406   | -2.65809631 | -4.07192870 |
| H | 5.37837002   | -2.00849958 | -2.26452315 |
| H | 5.24889184   | -0.91233709 | -0.87494102 |
| H | 5.01801250   | 0.99604521  | -2.60571131 |
| H | 4.77855895   | -0.28593221 | -3.81795601 |
| H | 3.11421413   | -0.75033962 | -1.45834749 |
| H | 0.45195182   | -1.07690254 | -3.02767936 |
| H | 1.39880544   | 2.35131540  | -0.68501373 |
| H | -1.17059845  | -3.01706493 | -0.75037940 |
| H | -2.61741591  | -2.15584569 | -0.15486990 |
| H | -2.57958960  | -3.80247890 | -2.72383840 |
| H | -2.99406965  | -4.50118326 | -1.15205832 |
| H | -4.87737628  | -2.93004530 | -0.89736038 |
| H | -4.46329606  | -2.15552588 | -2.44174964 |
| H | -4.88180205  | -4.26026483 | -3.64798917 |
| H | -5.22693247  | -5.09705298 | -2.12286858 |
| H | -7.17119809  | -3.63343063 | -1.72532215 |
| H | -6.81474361  | -2.72158248 | -3.20726110 |
| H | -7.15472613  | -4.76097923 | -4.56605084 |
| H | -7.46442621  | -5.70621459 | -3.09871872 |
| H | -9.44910331  | -4.29730637 | -2.60061535 |
| H | -9.13519632  | -3.33165375 | -4.05603960 |
| H | -10.88280181 | -5.03474606 | -4.47351082 |
| H | -9.75778796  | -6.32554009 | -4.00658783 |
| H | -9.44688945  | -5.35759055 | -5.46663086 |
| H | -3.75156361  | 1.75475981  | -1.18877506 |
| H | -3.77046577  | 0.08144655  | -1.79836455 |
| H | -4.96356114  | -0.65855148 | 0.20721287  |
| H | -4.97086490  | 0.98189047  | 0.86133490  |
| H | -6.35451852  | 0.08083217  | -1.71436855 |
| H | -7.14476039  | 0.34183523  | -0.15484225 |
| H | -5.74268924  | 2.50444142  | -1.79288945 |
| H | -6.49200973  | 2.73464459  | -0.20021056 |
| H | -7.91894031  | 1.80430390  | -2.73375635 |
| H | -8.68434932  | 2.01950108  | -1.14590248 |
| H | -8.10943623  | 4.42206264  | -1.16996203 |
| H | -7.28279379  | 4.22846256  | -2.72865511 |
| H | -9.41831149  | 3.52770460  | -3.78288677 |

|   |              |             |             |
|---|--------------|-------------|-------------|
| H | -10.25149636 | 3.69387982  | -2.22465696 |
| H | -10.59756728 | 5.69010177  | -3.66076052 |
| H | -8.84356764  | 5.95881750  | -3.72144396 |
| H | -9.71864043  | 6.11157552  | -2.17877008 |
| H | -0.91656609  | 4.34433674  | 1.34609454  |
| H | -0.11463689  | 4.12785334  | -0.23520871 |
| H | -2.22284794  | 3.52724132  | -1.28850836 |
| H | -3.03727337  | 3.43478496  | 0.28284619  |
| H | -2.71143286  | 5.88431390  | 0.59338707  |
| H | -1.94662373  | 5.97797610  | -1.00814662 |
| H | -4.02531101  | 5.17510646  | -2.07524373 |
| H | -4.78796665  | 4.97145108  | -0.48673345 |
| H | -4.54505140  | 7.41249651  | -0.05887623 |
| H | -3.81033853  | 7.61600141  | -1.66118030 |
| H | -5.89467683  | 6.78607871  | -2.72841326 |
| H | -6.62467176  | 6.55014884  | -1.12962108 |
| H | -6.37948579  | 8.99284002  | -0.66528502 |
| H | -5.67908071  | 9.21973964  | -2.27918536 |
| H | -8.07418266  | 9.80620329  | -2.28333944 |
| H | -8.49399056  | 8.19492238  | -1.67482403 |
| H | -7.79782370  | 8.38000758  | -3.30294302 |
| F | 14.08033925  | 0.01356316  | -0.55446244 |
| C | 10.93905742  | 1.63654539  | 2.60521730  |
| C | 11.52195362  | 0.65746293  | 1.81871323  |
| C | 10.74084001  | -0.40162313 | 1.26339870  |
| C | 9.35373917   | -0.43610594 | 1.55621569  |
| C | 8.76700717   | 0.57141523  | 2.36570424  |
| C | 9.56752138   | 1.59402541  | 2.87126188  |
| C | 11.29258069  | -1.41223842 | 0.43986387  |
| C | 10.50337378  | -2.42500021 | -0.05757190 |
| C | 9.13267056   | -2.46425482 | 0.24244567  |
| C | 8.55109688   | -1.48461652 | 1.03711810  |
| C | 7.12522804   | -1.51074349 | 1.34169452  |
| N | 6.55513835   | -0.51949270 | 2.14615815  |
| C | 7.34581605   | 0.51061943  | 2.66692186  |
| O | 6.77849274   | 1.32739099  | 3.39425411  |
| O | 6.37927238   | -2.38700685 | 0.91424963  |
| N | 12.87940815  | 0.72390205  | 1.59823318  |
| C | 5.10127870   | -0.56716059 | 2.47712059  |
| C | 4.38219035   | 0.51198175  | 1.63874560  |
| N | 2.95101472   | 0.38389852  | 1.95919657  |
| C | 2.12288640   | -0.51421470 | 1.33692997  |
| C | 0.80860359   | -0.79664858 | 1.92233324  |
| O | 2.55359128   | -1.07552234 | 0.33270108  |
| C | 0.16012905   | -2.00219778 | 1.61258178  |
| C | -1.05055433  | -2.32810285 | 2.21348816  |
| C | -1.64945133  | -1.45016581 | 3.12743776  |
| C | -1.02261174  | -0.23443517 | 3.41312106  |
| C | 0.19038324   | 0.09804572  | 2.81494690  |
| O | -1.60614156  | 0.63207493  | 4.31745167  |
| O | -2.84079854  | -1.75110121 | 3.75974205  |
| O | -1.61843404  | -3.53392564 | 1.86073753  |
| C | -1.76969474  | -4.59426947 | 2.83044941  |
| C | -2.49802226  | -5.72543960 | 2.08873496  |
| C | -3.94738452  | -5.33633525 | 1.76213681  |
| C | -4.70977840  | -6.44120718 | 1.02368550  |

|   |              |             |             |
|---|--------------|-------------|-------------|
| C | -6.15737634  | -5.98425548 | 0.79390910  |
| C | -6.94547489  | -7.01322804 | -0.02427593 |
| C | -8.39373412  | -6.54231157 | -0.20983630 |
| C | -9.18513928  | -7.54252092 | -1.05730075 |
| C | -4.05348406  | -1.81224722 | 2.98734150  |
| C | -5.17167126  | -2.04130318 | 4.01284281  |
| C | -6.44992532  | -2.67529307 | 3.43502105  |
| C | -7.00711811  | -1.95413858 | 2.20073415  |
| C | -8.31879701  | -2.60638395 | 1.74312878  |
| C | -8.87088456  | -1.88843012 | 0.50566346  |
| C | -10.15731742 | -2.55859376 | 0.01042535  |
| C | -10.70063592 | -1.82199380 | -1.21827213 |
| C | -1.82992828  | 2.03493127  | 4.05069501  |
| C | -3.20122659  | 2.11073555  | 3.37274791  |
| C | -3.68600335  | 3.56621380  | 3.29588788  |
| C | -5.06253260  | 3.65696447  | 2.62504381  |
| C | -5.55010894  | 5.11183720  | 2.59442550  |
| C | -6.92146411  | 5.21473118  | 1.91421452  |
| C | -7.41258208  | 6.66778897  | 1.90342302  |
| C | -8.78213217  | 6.77207552  | 1.22502376  |
| H | 12.32710813  | -1.37654611 | 0.19318681  |
| H | 13.36873184  | 1.60148910  | 1.78526919  |
| H | 13.28121741  | 0.26067799  | 0.70972464  |
| H | 11.53716466  | 2.41206290  | 3.00635508  |
| H | 9.13249117   | 2.34979684  | 3.47476774  |
| H | 10.93227967  | -3.17154033 | -0.67651070 |
| H | 8.53917049   | -3.25146797 | -0.15031859 |
| H | 4.67331460   | -1.52921945 | 2.22909873  |
| H | 4.96197610   | -0.34040232 | 3.52574171  |
| H | 4.74242128   | 1.50683266  | 1.90418814  |
| H | 4.55308267   | 0.35198590  | 0.57723381  |
| H | 2.62858556   | 0.79550185  | 2.84439040  |
| H | 0.60156276   | -2.67720207 | 0.92564524  |
| H | 0.64065788   | 1.02724605  | 3.03923678  |
| H | -0.78708302  | -4.93309396 | 3.16089031  |
| H | -2.35474823  | -4.25958215 | 3.68838648  |
| H | -1.95966696  | -5.95508770 | 1.16779781  |
| H | -2.50080296  | -6.61295546 | 2.72264438  |
| H | -4.46294057  | -5.10689651 | 2.69533651  |
| H | -3.94456124  | -4.44749946 | 1.13125493  |
| H | -4.22757792  | -6.63571554 | 0.06368684  |
| H | -4.70484351  | -7.35649236 | 1.61846240  |
| H | -6.64608942  | -5.84404817 | 1.75987655  |
| H | -6.15727511  | -5.03053226 | 0.26284079  |
| H | -6.47460731  | -7.13613735 | -1.00143469 |
| H | -6.93947825  | -7.97402898 | 0.49401377  |
| H | -8.87401872  | -6.43973453 | 0.76528718  |
| H | -8.40060702  | -5.57039288 | -0.70440285 |
| H | -10.20402271 | -7.17845248 | -1.19512807 |
| H | -9.21872753  | -8.51132825 | -0.55702441 |
| H | -8.71600100  | -7.65923414 | -2.03489374 |
| H | -4.00403267  | -2.63575445 | 2.28219817  |
| H | -4.20912589  | -0.87324866 | 2.45578728  |
| H | -4.79850969  | -2.70298208 | 4.79666939  |
| H | -5.41300599  | -1.08360503 | 4.47581914  |
| H | -6.24102509  | -3.71151701 | 3.16954841  |

|   |              |             |             |
|---|--------------|-------------|-------------|
| H | -7.21028630  | -2.68198150 | 4.21846441  |
| H | -7.18155049  | -0.90282058 | 2.43860972  |
| H | -6.28676246  | -2.02488211 | 1.38726584  |
| H | -8.13683629  | -3.65512187 | 1.50082513  |
| H | -9.05329678  | -2.55422129 | 2.54907209  |
| H | -9.08267717  | -0.84791970 | 0.75893322  |
| H | -8.12471141  | -1.91357803 | -0.29010811 |
| H | -9.95168660  | -3.59758979 | -0.25277210 |
| H | -10.90920637 | -2.54072966 | 0.80199136  |
| H | -11.60157728 | -2.32245480 | -1.57550823 |
| H | -9.95605491  | -1.82125192 | -2.01522446 |
| H | -10.94762268 | -0.79197422 | -0.95733074 |
| H | -1.85193733  | 2.57777769  | 4.99628555  |
| H | -1.06077176  | 2.44964190  | 3.39954933  |
| H | -3.12165410  | 1.68642306  | 2.37065011  |
| H | -3.91499837  | 1.52031892  | 3.94985651  |
| H | -3.75457963  | 3.97348550  | 4.30664099  |
| H | -2.96732296  | 4.15923031  | 2.72891269  |
| H | -4.99371402  | 3.27678131  | 1.60614376  |
| H | -5.77809024  | 3.04703320  | 3.17994094  |
| H | -5.62686224  | 5.48748901  | 3.61667778  |
| H | -4.83069547  | 5.72541398  | 2.04975252  |
| H | -6.84406680  | 4.85446540  | 0.88843598  |
| H | -7.64071928  | 4.59375068  | 2.45159301  |
| H | -7.49278503  | 7.03428538  | 2.92866500  |
| H | -6.69749481  | 7.29259315  | 1.36553606  |
| H | -9.10716067  | 7.81319312  | 1.21750116  |
| H | -9.51553665  | 6.17554723  | 1.76918583  |
| H | -8.72035253  | 6.41480562  | 0.19731323  |

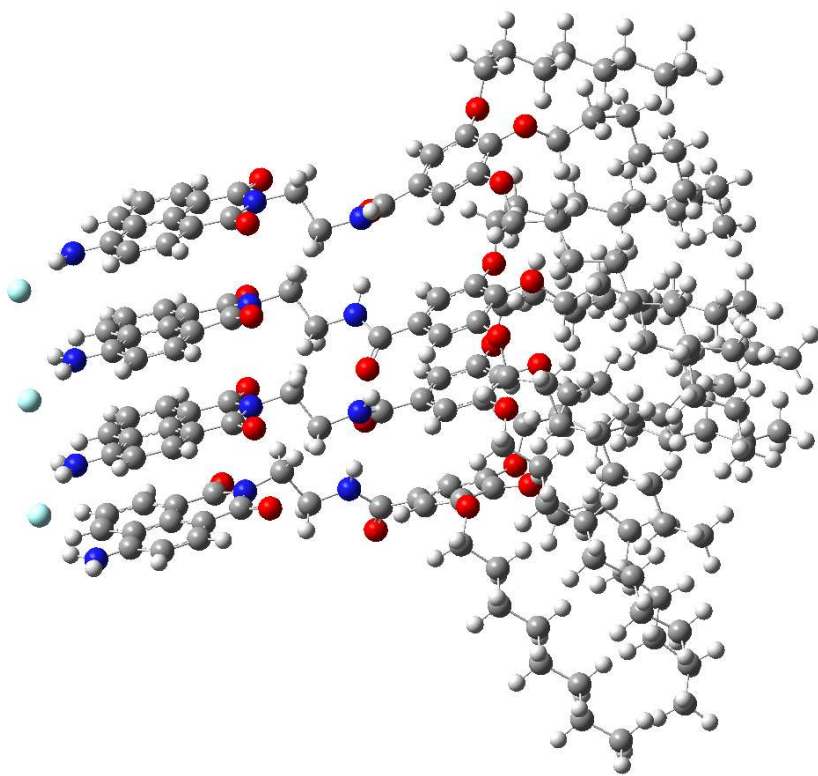

Energy = -9799.24678 Hartrees

|   |              |             |             |
|---|--------------|-------------|-------------|
| C | 9.89892583   | 6.03793528  | 0.89500401  |
| C | 10.97725184  | 6.13070080  | 0.03335107  |
| C | 10.81348016  | 6.01200951  | -1.37985009 |
| C | 9.51353085   | 5.76717486  | -1.88040691 |
| C | 8.42254093   | 5.61914097  | -0.98440228 |
| C | 8.62582205   | 5.77771322  | 0.38482705  |
| C | 11.89221894  | 6.10268779  | -2.29262516 |
| C | 11.68175054  | 5.99011041  | -3.64945222 |
| C | 10.38664706  | 5.76975259  | -4.14549220 |
| C | 9.30800179   | 5.64974091  | -3.27909107 |
| C | 7.96396286   | 5.38503375  | -3.77786235 |
| N | 6.93757998   | 5.09418592  | -2.88217546 |
| C | 7.11691598   | 5.27722801  | -1.50872015 |
| O | 6.13245283   | 5.12237436  | -0.78789982 |
| O | 7.67469352   | 5.40951375  | -4.97038875 |
| N | 12.17167591  | 6.35268123  | 0.57623301  |
| C | 5.63810375   | 4.58096339  | -3.38871032 |
| C | 4.72218720   | 5.80588259  | -3.56246625 |
| N | 3.35128331   | 5.30220105  | -3.50033152 |
| C | 2.27392622   | 6.07557561  | -3.80411227 |
| C | 0.97166059   | 5.68877979  | -3.27430614 |
| O | 2.45668850   | 7.07298566  | -4.49133738 |
| C | -0.11772981  | 5.51001700  | -4.13807156 |
| C | -1.36403314  | 5.17247079  | -3.62390831 |
| C | -1.56001488  | 5.06157656  | -2.24085627 |
| C | -0.46729801  | 5.21314759  | -1.38252627 |
| C | 0.79414648   | 5.51183038  | -1.89206594 |
| O | -0.63637975  | 5.06967779  | -0.02095032 |
| O | -2.82112994  | 4.85589633  | -1.71803438 |
| O | -2.38893103  | 4.93670839  | -4.50966826 |
| C | -2.76054339  | 3.54875015  | -4.68576343 |
| C | -3.99429866  | 3.54968320  | -5.59376919 |
| C | -5.25060305  | 4.01005690  | -4.84118848 |
| C | -6.48191599  | 3.97761068  | -5.75291708 |
| C | -7.74241160  | 4.32418887  | -4.95059687 |
| C | -8.98270983  | 4.28545121  | -5.85290835 |
| C | -10.25510679 | 4.54260831  | -5.03588351 |
| C | -11.49657788 | 4.44098971  | -5.92716721 |
| C | -3.75693662  | 5.94574165  | -1.86221947 |
| C | -5.06043498  | 5.43555276  | -1.24867184 |
| C | -6.19113405  | 6.47297391  | -1.28114447 |
| C | -5.93914212  | 7.63857877  | -0.31242327 |
| C | -7.12239822  | 8.61399077  | -0.32221032 |
| C | -6.89611853  | 9.74169326  | 0.69307582  |
| C | -8.06987346  | 10.72781712 | 0.67083943  |
| C | -7.86123110  | 11.83604690 | 1.70651526  |
| C | -0.34635657  | 6.14121983  | 0.90550017  |
| C | -1.58500041  | 7.04349297  | 0.88256417  |
| C | -1.58691095  | 8.03595956  | 2.05169922  |
| C | -2.88521309  | 8.85545022  | 2.06381973  |
| C | -2.92374250  | 9.77072329  | 3.29425911  |
| C | -4.23269310  | 10.56765401 | 3.35017070  |
| C | -4.26710576  | 11.44203051 | 4.61073520  |
| C | -5.58167341  | 12.22165444 | 4.70048351  |
| H | 12.88973986  | 6.27145157  | -1.91758154 |
| H | 12.28719795  | 6.38161405  | 1.58829355  |



|   |              |             |             |
|---|--------------|-------------|-------------|
| H | 13.02783739  | 6.33062433  | -0.02393302 |
| H | 10.04761278  | 6.14060541  | 1.93831086  |
| H | 7.80924107   | 5.68327836  | 1.05442074  |
| H | 12.49919165  | 6.06877737  | -4.31892034 |
| H | 10.23979498  | 5.67807957  | -5.19191310 |
| H | 5.75396838   | 4.08890219  | -4.34587142 |
| H | 5.20816443   | 3.90684392  | -2.66304423 |
| H | 4.87528936   | 6.51546647  | -2.74735727 |
| H | 4.92678270   | 6.29456667  | -4.51797332 |
| H | 3.17285055   | 4.43462440  | -2.95256085 |
| H | 0.00974172   | 5.62578632  | -5.18268807 |
| H | 1.61974859   | 5.61181086  | -1.23716195 |
| H | -1.94374101  | 3.00885728  | -5.16600477 |
| H | -2.99297124  | 3.08211971  | -3.72625652 |
| H | -3.81013029  | 4.20138082  | -6.44966545 |
| H | -4.14987237  | 2.53404999  | -5.95743409 |
| H | -5.41549265  | 3.35125659  | -3.98873921 |
| H | -5.10248579  | 5.02869147  | -4.47870391 |
| H | -6.35267980  | 4.69775206  | -6.56389217 |
| H | -6.58934384  | 2.98053752  | -6.18291074 |
| H | -7.86060799  | 3.60103766  | -4.14246129 |
| H | -7.63878573  | 5.32143611  | -4.51901745 |
| H | -8.88971947  | 5.04736063  | -6.62861774 |
| H | -9.05193881  | 3.30911990  | -6.33422083 |
| H | -10.33387794 | 3.80675056  | -4.23461785 |
| H | -10.21033797 | 5.53904010  | -4.59209003 |
| H | -12.39051812 | 4.63072738  | -5.33235659 |
| H | -11.56539241 | 3.44161601  | -6.35955239 |
| H | -11.44192790 | 5.17816519  | -6.73028545 |
| H | -3.39374344  | 6.81971206  | -1.32511923 |
| H | -3.90448776  | 6.19414190  | -2.91296548 |
| H | -5.37507452  | 4.55926135  | -1.81288586 |
| H | -4.87264362  | 5.13350617  | -0.21915766 |
| H | -6.30707287  | 6.85397698  | -2.29777078 |
| H | -7.12125773  | 5.97609161  | -0.99725171 |
| H | -5.03369898  | 8.17580888  | -0.59874949 |
| H | -5.81041716  | 7.24428071  | 0.69722029  |
| H | -7.23115896  | 9.04060055  | -1.32158832 |
| H | -8.03843880  | 8.07804942  | -0.06647876 |
| H | -6.80639071  | 9.31342651  | 1.69240693  |
| H | -5.97232963  | 10.27092845 | 0.45098210  |
| H | -8.15262012  | 11.17529062 | -0.32206017 |
| H | -8.99821197  | 10.19882382 | 0.89569242  |
| H | -8.69421012  | 12.53916169 | 1.66276903  |
| H | -6.93369567  | 12.37256452 | 1.49909040  |
| H | -7.81437214  | 11.40589728 | 2.70669210  |
| H | -0.20540290  | 5.72271080  | 1.90171671  |
| H | 0.54219999   | 6.69778513  | 0.60557264  |
| H | -1.60969352  | 7.58802610  | -0.06252104 |
| H | -2.47529420  | 6.41698764  | 0.94700203  |
| H | -1.50330832  | 7.48545477  | 2.98985553  |
| H | -0.73200548  | 8.70938481  | 1.96158676  |
| H | -2.94708088  | 9.45960204  | 1.15611982  |
| H | -3.74229697  | 8.18157077  | 2.09452640  |
| H | -2.83734158  | 9.16311551  | 4.19746664  |
| H | -2.08080431  | 10.46423764 | 3.25712036  |

|   |              |             |             |
|---|--------------|-------------|-------------|
| H | -4.31400444  | 11.20138007 | 2.46512722  |
| H | -5.07751328  | 9.87822051  | 3.36721454  |
| H | -4.16732758  | 10.81160779 | 5.49681009  |
| H | -3.43314511  | 12.14650445 | 4.58870573  |
| H | -5.57633851  | 12.84538625 | 5.59450552  |
| H | -6.42249463  | 11.52858243 | 4.75841464  |
| H | -5.69783973  | 12.86141233 | 3.82391041  |
| C | 10.82474550  | 2.21250664  | 2.53509557  |
| C | 11.51924138  | 2.41051670  | 1.35395086  |
| C | 10.87623572  | 2.25399524  | 0.08802745  |
| C | 9.49708768   | 1.92447976  | 0.07154785  |
| C | 8.78466312   | 1.76960828  | 1.29010412  |
| C | 9.46251901   | 1.90217739  | 2.50032522  |
| C | 11.55878949  | 2.39568455  | -1.14394404 |
| C | 10.90588404  | 2.19640258  | -2.33999231 |
| C | 9.54216696   | 1.86458432  | -2.35390598 |
| C | 8.83224383   | 1.73679470  | -1.16700908 |
| C | 7.41175260   | 1.40567794  | -1.17207919 |
| N | 6.71853130   | 1.24796343  | 0.02976926  |
| C | 7.36436959   | 1.46494246  | 1.25107361  |
| O | 6.66409965   | 1.37981474  | 2.25841890  |
| O | 6.76935057   | 1.25375102  | -2.20562459 |
| N | 12.80273529  | 2.73220533  | 1.42893452  |
| C | 5.29365615   | 0.79539408  | 0.01806197  |
| C | 4.38530884   | 2.01841978  | 0.22967878  |
| N | 2.99334446   | 1.55502917  | 0.03762243  |
| C | 2.22804542   | 1.86949580  | -1.05421886 |
| C | 0.81121175   | 1.50501791  | -1.06640638 |
| O | 2.77927094   | 2.45126165  | -1.98029076 |
| C | 0.18855855   | 1.09932695  | -2.25744086 |
| C | -1.15175107  | 0.72563898  | -2.25288788 |
| C | -1.90381012  | 0.77848337  | -1.07333460 |
| C | -1.29011488  | 1.20883388  | 0.10991131  |
| C | 0.05580207   | 1.56311428  | 0.11462679  |
| O | -2.02159470  | 1.25718403  | 1.28443497  |
| O | -3.23967743  | 0.40916744  | -1.08572716 |
| O | -1.71262055  | 0.31152019  | -3.44305987 |
| C | -2.10904108  | -1.07509159 | -3.55644346 |
| C | -3.19079119  | -1.12598600 | -4.63979558 |
| C | -4.53607257  | -0.59907561 | -4.11667724 |
| C | -5.60933043  | -0.69479726 | -5.20753939 |
| C | -6.98493310  | -0.28536985 | -4.66791741 |
| C | -8.02037988  | -0.33627168 | -5.79979789 |
| C | -9.42573675  | -0.03624190 | -5.26905541 |
| C | -10.45330620 | -0.05561992 | -6.40442846 |
| C | -4.23467493  | 1.43393095  | -0.90118163 |
| C | -5.28167000  | 0.81220957  | 0.02807409  |
| C | -6.33856970  | 1.83168653  | 0.48855653  |
| C | -7.39301443  | 2.18231116  | -0.57403751 |
| C | -8.44983754  | 1.07819395  | -0.70256574 |
| C | -9.59460203  | 1.51349551  | -1.62146513 |
| C | -10.66951009 | 0.42288097  | -1.68952343 |
| C | -11.85917563 | 0.87775809  | -2.54102330 |
| C | -1.85298793  | 2.24567546  | 2.32870590  |
| C | -3.11720702  | 3.09699113  | 2.24626153  |
| C | -3.27918818  | 4.03212731  | 3.44969860  |

|   |              |             |             |
|---|--------------|-------------|-------------|
| C | -4.59117165  | 4.81397513  | 3.30765738  |
| C | -4.82689885  | 5.72701258  | 4.51580252  |
| C | -6.13398883  | 6.50862965  | 4.33633137  |
| C | -6.38923636  | 7.42640795  | 5.53751373  |
| C | -7.67775904  | 8.22905945  | 5.33151312  |
| H | 12.61655925  | 2.64579423  | -1.13629878 |
| H | 13.25290346  | 2.80199900  | 2.29993209  |
| H | 13.36387103  | 2.89162477  | 0.57267888  |
| H | 11.32827491  | 2.29504887  | 3.46464498  |
| H | 8.94322050   | 1.75846596  | 3.41512697  |
| H | 11.43468023  | 2.29258881  | -3.25518298 |
| H | 9.05892034   | 1.70360337  | -3.28486195 |
| H | 5.04127624   | 0.35502272  | -0.93661265 |
| H | 5.12426144   | 0.10311682  | 0.83248496  |
| H | 4.51941948   | 2.41565932  | 1.23723090  |
| H | 4.63997667   | 2.79192422  | -0.49074080 |
| H | 2.58426819   | 0.87564329  | 0.71298944  |
| H | 0.74112356   | 1.06880107  | -3.16038064 |
| H | 0.52140737   | 1.86424369  | 1.01438673  |
| H | -1.25041697  | -1.67750151 | -3.85324662 |
| H | -2.51212118  | -1.44462634 | -2.61567798 |
| H | -2.86690893  | -0.54238611 | -5.50260067 |
| H | -3.31700327  | -2.16488307 | -4.94564451 |
| H | -4.83915261  | -1.18877618 | -3.24999281 |
| H | -4.42198444  | 0.44077766  | -3.80720953 |
| H | -5.33516979  | -0.04488217 | -6.03918265 |
| H | -5.66400550  | -1.72214760 | -5.57079151 |
| H | -7.27952480  | -0.96763162 | -3.86909590 |
| H | -6.93606850  | 0.72664631  | -4.26204954 |
| H | -7.75689438  | 0.39812905  | -6.56352041 |
| H | -8.01359615  | -1.32767427 | -6.25486275 |
| H | -9.70164802  | -0.78251224 | -4.52310116 |
| H | -9.43202862  | 0.94732197  | -4.80059977 |
| H | -11.44466337 | 0.15960446  | -6.00372957 |
| H | -10.46970387 | -1.03729312 | -6.87893450 |
| H | -10.20097946 | 0.69963635  | -7.15052922 |
| H | -4.67534823  | 1.70442043  | -1.85878001 |
| H | -3.79173322  | 2.31426862  | -0.43654263 |
| H | -5.75367152  | -0.03203844 | -0.47299381 |
| H | -4.76042579  | 0.43562776  | 0.90671838  |
| H | -6.84319593  | 1.44244201  | 1.37342108  |
| H | -5.83320146  | 2.74784050  | 0.79308894  |
| H | -7.89011221  | 3.10433098  | -0.26659092 |
| H | -6.92063721  | 2.35469808  | -1.54142354 |
| H | -7.99346603  | 0.16709458  | -1.09435162 |
| H | -8.85898734  | 0.87421729  | 0.28492965  |
| H | -10.03909986 | 2.43383923  | -1.23627902 |
| H | -9.20204384  | 1.70256864  | -2.61998785 |
| H | -10.24038883 | -0.48248374 | -2.12078766 |
| H | -11.02567352 | 0.19392161  | -0.68260366 |
| H | -12.60023149 | 0.07863239  | -2.59170383 |
| H | -11.53096927 | 1.11896462  | -3.55199420 |
| H | -12.32031831 | 1.76006998  | -2.09571623 |
| H | -1.79130399  | 1.74874676  | 3.29671476  |
| H | -0.97527444  | 2.87032227  | 2.16872600  |
| H | -3.07938933  | 3.67900659  | 1.32522787  |

|   |             |             |             |
|---|-------------|-------------|-------------|
| H | -3.97731304 | 2.43341775  | 2.20111537  |
| H | -3.30604908 | 3.44379127  | 4.36931830  |
| H | -2.43927553 | 4.72606311  | 3.49543729  |
| H | -4.54993535 | 5.41845366  | 2.40181333  |
| H | -5.42399314 | 4.11460135  | 3.22023964  |
| H | -4.88708281 | 5.12346733  | 5.42341157  |
| H | -3.99513845 | 6.42686012  | 4.61197525  |
| H | -6.07093508 | 7.11115954  | 3.43003883  |
| H | -6.96547059 | 5.80939976  | 4.23319151  |
| H | -6.48042969 | 6.82481507  | 6.44434282  |
| H | -5.55223898 | 8.11548192  | 5.65877633  |
| H | -7.84065181 | 8.88272596  | 6.18844910  |
| H | -8.52744631 | 7.55226868  | 5.23523234  |
| H | -7.59836944 | 8.83872191  | 4.43081221  |
| C | 10.66579722 | -1.31074671 | 2.52123323  |
| C | 11.42576349 | -1.28247537 | 1.36497620  |
| C | 10.82384971 | -1.40706225 | 0.07740475  |
| C | 9.43382581  | -1.65681651 | 0.01474219  |
| C | 8.68995674  | -1.81980550 | 1.21050920  |
| C | 9.30095866  | -1.59282636 | 2.44178473  |
| C | 11.55144181 | -1.26983488 | -1.12933495 |
| C | 10.91374253 | -1.34077684 | -2.34841829 |
| C | 9.52913052  | -1.56770054 | -2.40754852 |
| C | 8.78803700  | -1.74109421 | -1.24560515 |
| C | 7.35573654  | -2.01270337 | -1.28993579 |
| N | 6.66958621  | -2.32755238 | -0.11379248 |
| C | 7.31043849  | -2.24876827 | 1.12649367  |
| O | 6.65275758  | -2.56907894 | 2.11483478  |
| O | 6.69915563  | -1.99624347 | -2.32677368 |
| N | 12.74362524 | -1.03008585 | 1.49477508  |
| C | 5.24726254  | -2.76878721 | -0.17548995 |
| C | 4.40483902  | -1.56438977 | 0.27379480  |
| N | 3.05869057  | -2.05469671 | 0.56344941  |
| C | 2.25187220  | -1.48262705 | 1.50552514  |
| C | 0.88025407  | -1.97768581 | 1.63815199  |
| O | 2.72442158  | -0.57627983 | 2.19153464  |
| C | 0.20217083  | -2.52279118 | 0.53258174  |
| C | -1.10146589 | -2.98584679 | 0.66703286  |
| C | -1.74184066 | -2.94659102 | 1.90711691  |
| C | -1.09216791 | -2.35405087 | 2.99422674  |
| C | 0.21401192  | -1.88728209 | 2.86924900  |
| O | -1.76217145 | -2.16743513 | 4.18619449  |
| O | -2.99870947 | -3.47830816 | 2.05529238  |
| O | -1.75554130 | -3.42704320 | -0.46238175 |
| C | -1.92427583 | -4.83489024 | -0.68968267 |
| C | -2.60958036 | -4.95601425 | -2.05333953 |
| C | -4.07611916 | -4.49910699 | -2.02325491 |
| C | -4.67466214 | -4.59501123 | -3.43201607 |
| C | -6.15630122 | -4.20087701 | -3.43565871 |
| C | -6.70143469 | -4.21854973 | -4.86936492 |
| C | -8.19516094 | -3.87442920 | -4.89586649 |
| C | -8.70605321 | -3.80237038 | -6.33804571 |
| C | -4.12672942 | -2.60758692 | 1.87853882  |
| C | -5.29241787 | -3.42148869 | 2.43521890  |
| C | -6.66379638 | -2.74662703 | 2.33026126  |
| C | -6.79937831 | -1.53552436 | 3.26211115  |

|   |              |             |             |
|---|--------------|-------------|-------------|
| C | -8.25608374  | -1.05466235 | 3.27404432  |
| C | -8.41754318  | 0.18137695  | 4.16759905  |
| C | -9.84362654  | 0.73446367  | 4.06214448  |
| C | -10.03679677 | 1.91784919  | 5.01535660  |
| C | -2.02273491  | -0.78336804 | 4.50301512  |
| C | -3.31791972  | -0.75980757 | 5.31564209  |
| C | -3.78997811  | 0.69054550  | 5.47314519  |
| C | -5.07162219  | 0.78735279  | 6.30515126  |
| C | -5.53741593  | 2.24776781  | 6.35801448  |
| C | -6.78193128  | 2.39766349  | 7.24041982  |
| C | -7.24094196  | 3.86133735  | 7.26126157  |
| C | -8.47690903  | 4.02753638  | 8.14976017  |
| H | 12.62465831  | -1.08243490 | -1.08941058 |
| H | 13.16735942  | -0.90505447 | 2.41211109  |
| H | 13.38836432  | -0.92820623 | 0.64112763  |
| H | 11.13148299  | -1.16376646 | 3.46144105  |
| H | 8.73405510   | -1.65927725 | 3.33612740  |
| H | 11.46692570  | -1.22160674 | -3.24739108 |
| H | 9.05258561   | -1.61086952 | -3.35491886 |
| H | 4.95072789   | -3.05006042 | -1.17782111 |
| H | 5.09287775   | -3.58578992 | 0.51077973  |
| H | 4.83291019   | -1.13888107 | 1.17963618  |
| H | 4.38162317   | -0.80774702 | -0.51320072 |
| H | 2.80270950   | -3.01727673 | 0.26664046  |
| H | 0.67254951   | -2.56641768 | -0.41399039 |
| H | 0.70368282   | -1.45087559 | 3.70086968  |
| H | -0.94684688  | -5.30920761 | -0.74029744 |
| H | -2.53090542  | -5.28625526 | 0.09617503  |
| H | -2.05166751  | -4.36199279 | -2.77869250 |
| H | -2.56832449  | -6.00104342 | -2.36437363 |
| H | -4.63979171  | -5.13383968 | -1.33877274 |
| H | -4.13042773  | -3.46513543 | -1.67482620 |
| H | -4.12211337  | -3.93076601 | -4.09911227 |
| H | -4.57611218  | -5.61757861 | -3.80048586 |
| H | -6.71778775  | -4.90580195 | -2.82147072 |
| H | -6.27014851  | -3.19894647 | -3.01709789 |
| H | -6.15154412  | -3.49243801 | -5.47079929 |
| H | -6.55396728  | -5.21036578 | -5.30175997 |
| H | -8.75658265  | -4.63886714 | -4.35886140 |
| H | -8.36032673  | -2.91260080 | -4.40928189 |
| H | -9.76952178  | -3.56168032 | -6.33627228 |
| H | -8.56092804  | -4.76243744 | -6.83503581 |
| H | -8.16837457  | -3.02799758 | -6.88703266 |
| H | -3.99111120  | -1.68774927 | 2.44576944  |
| H | -4.27053995  | -2.38923708 | 0.81924988  |
| H | -5.32619203  | -4.35652470 | 1.88492340  |
| H | -5.08517139  | -3.65826011 | 3.47646545  |
| H | -6.84676830  | -2.44132290 | 1.29807095  |
| H | -7.41879452  | -3.48426449 | 2.60957289  |
| H | -6.14709967  | -0.73202894 | 2.91721421  |
| H | -6.50944352  | -1.81903940 | 4.27467533  |
| H | -8.56776739  | -0.82052280 | 2.25637633  |
| H | -8.89766098  | -1.85288793 | 3.65284864  |
| H | -8.21162909  | -0.09719375 | 5.20078052  |
| H | -7.70824214  | 0.95450702  | 3.86563688  |
| H | -10.03172482 | 1.06461944  | 3.03826783  |

|   |              |              |             |
|---|--------------|--------------|-------------|
| H | -10.56208917 | -0.04792624  | 4.31541045  |
| H | -11.04285406 | 2.32205601   | 4.89656377  |
| H | -9.31073759  | 2.70200122   | 4.79398401  |
| H | -9.90921013  | 1.58791146   | 6.04673623  |
| H | -1.19780839  | -0.36009727  | 5.07603543  |
| H | -2.16642286  | -0.21969365  | 3.58142132  |
| H | -4.08212726  | -1.32835953  | 4.78685508  |
| H | -3.14043920  | -1.21050672  | 6.29324176  |
| H | -3.00401781  | 1.27799005   | 5.95237525  |
| H | -3.98615738  | 1.10288438   | 4.48393310  |
| H | -5.85024727  | 0.17592793   | 5.84992415  |
| H | -4.87936913  | 0.42428798   | 7.31737748  |
| H | -4.73642394  | 2.87109273   | 6.76151049  |
| H | -5.77125714  | 2.58817760   | 5.34757069  |
| H | -7.58406742  | 1.77150163   | 6.84710428  |
| H | -6.54923310  | 2.07382908   | 8.25702398  |
| H | -6.43657534  | 4.49166937   | 7.64685472  |
| H | -7.48217852  | 4.18539906   | 6.24749380  |
| H | -8.78566147  | 5.07357845   | 8.15293296  |
| H | -8.24663787  | 3.72235760   | 9.17237071  |
| H | -9.29719822  | 3.41702654   | 7.76858883  |
| C | 10.84355924  | -5.33503987  | 3.28894582  |
| C | 11.37773176  | -5.31088187  | 2.01177028  |
| C | 10.55569846  | -5.54115346  | 0.86577614  |
| C | 9.18444452   | -5.83615215  | 1.07442825  |
| C | 8.65333096   | -5.88204103  | 2.38970120  |
| C | 9.48768690   | -5.61654307  | 3.47371748  |
| C | 11.04545671  | -5.47313101  | -0.46153206 |
| C | 10.21160270  | -5.69039197  | -1.53450568 |
| C | 8.85761121   | -5.99538826  | -1.32561899 |
| C | 8.33944640   | -6.07632327  | -0.03977567 |
| C | 6.93295381   | -6.39187870  | 0.18502134  |
| N | 6.42395806   | -6.46566411  | 1.48449598  |
| C | 7.25179962   | -6.21933792  | 2.58463693  |
| O | 6.73532093   | -6.32982939  | 3.69741212  |
| O | 6.15220300   | -6.60289527  | -0.73987776 |
| N | 12.71002391  | -4.94738211  | 1.89136875  |
| C | 4.99635157   | -6.83433973  | 1.70675320  |
| C | 4.21787216   | -5.55224004  | 2.07505950  |
| N | 2.79649476   | -5.94855274  | 2.13177701  |
| C | 2.01243950   | -6.04911520  | 1.01214992  |
| C | 0.73493889   | -6.75672244  | 1.09926792  |
| O | 2.44315626   | -5.56980275  | -0.03332025 |
| C | 0.27656174   | -7.47087138  | -0.01781351 |
| C | -0.93490848  | -8.14997698  | 0.02710680  |
| C | -1.70678539  | -8.14620347  | 1.19606279  |
| C | -1.25016229  | -7.43902041  | 2.31159530  |
| C | -0.04435726  | -6.74201100  | 2.27004518  |
| O | -2.01995308  | -7.42471871  | 3.45601957  |
| O | -2.92739257  | -8.78358704  | 1.25737805  |
| O | -1.34691189  | -8.75804857  | -1.14115148 |
| C | -1.67100484  | -10.16700216 | -1.22434292 |
| C | -2.34343164  | -10.35021787 | -2.59255912 |
| C | -3.72953905  | -9.68867911  | -2.62479427 |
| C | -4.42063239  | -9.82183846  | -3.98587433 |
| C | -5.82353075  | -9.20175613  | -3.90562201 |

|   |             |              |             |
|---|-------------|--------------|-------------|
| C | -6.51263240 | -9.19583104  | -5.27467284 |
| C | -7.92623285 | -8.61093391  | -5.15189445 |
| C | -8.61031922 | -8.55521853  | -6.52006221 |
| C | -4.04977890 | -8.08597569  | 0.68873259  |
| C | -5.28130711 | -8.93761630  | 1.02485448  |
| C | -6.48014092 | -8.70687354  | 0.08580040  |
| C | -6.85842248 | -7.23078329  | -0.08710159 |
| C | -8.06570640 | -7.06730186  | -1.02011321 |
| C | -8.37267911 | -5.57666861  | -1.22102501 |
| C | -9.51166953 | -5.38081863  | -2.22780845 |
| C | -9.73560533 | -3.88913290  | -2.49649760 |
| C | -2.36514367 | -6.17133969  | 4.07679560  |
| C | -3.83069692 | -6.32565127  | 4.49164854  |
| C | -4.31072480 | -5.05919309  | 5.21210831  |
| C | -5.83441688 | -5.04519735  | 5.38522059  |
| C | -6.27316266 | -3.75778844  | 6.09641449  |
| C | -7.80013504 | -3.61139887  | 6.07875436  |
| C | -8.22481582 | -2.33797530  | 6.82142188  |
| C | -9.73738267 | -2.12497797  | 6.70675710  |
| H | 12.06760268 | -5.23686211  | -0.63050494 |
| H | 13.28413185 | -4.91074501  | 2.70652033  |
| H | 13.10915712 | -4.51328214  | 0.99482652  |
| H | 11.46886048 | -5.14399599  | 4.12332690  |
| H | 9.09206838  | -5.63548761  | 4.45820781  |
| H | 10.59413577 | -5.62247292  | -2.52106212 |
| H | 8.22952661  | -6.16341415  | -2.16352483 |
| H | 4.55984813  | -7.25378297  | 0.81029835  |
| H | 4.92402851  | -7.53028639  | 2.53234016  |
| H | 4.54806434  | -5.17382562  | 3.04400265  |
| H | 4.37450655  | -4.77627368  | 1.32869025  |
| H | 2.47169604  | -6.41940158  | 2.98631330  |
| H | 0.85104165  | -7.48494543  | -0.90722283 |
| H | 0.27405624  | -6.19471726  | 3.11842693  |
| H | -0.75491034 | -10.75623166 | -1.17291706 |
| H | -2.34858640 | -10.46941161 | -0.42567657 |
| H | -1.70670522 | -9.91781095  | -3.36597617 |
| H | -2.45422317 | -11.41850238 | -2.78758122 |
| H | -4.35259637 | -10.14760580 | -1.85605239 |
| H | -3.62125001 | -8.62734370  | -2.40537038 |
| H | -3.83098179 | -9.30239257  | -4.74297953 |
| H | -4.50320393 | -10.87652582 | -4.25850925 |
| H | -6.42858011 | -9.77810900  | -3.20441386 |
| H | -5.74782072 | -8.17526297  | -3.54103051 |
| H | -5.92792398 | -8.59176891  | -5.97093662 |
| H | -6.57405908 | -10.21629142 | -5.65739142 |
| H | -8.52151910 | -9.22987174  | -4.47746696 |
| H | -7.87062537 | -7.60292603  | -4.73950985 |
| H | -9.60643231 | -8.12435533  | -6.41362058 |
| H | -8.70210734 | -9.56161005  | -6.93360692 |
| H | -8.02926948 | -7.93720766  | -7.20518841 |
| H | -3.92205306 | -8.00120917  | -0.38718512 |
| H | -4.14029288 | -7.09256219  | 1.12885761  |
| H | -5.00736093 | -9.99260248  | 0.96380658  |
| H | -5.57289139 | -8.72795596  | 2.05458519  |
| H | -6.24237417 | -9.12238394  | -0.89271084 |
| H | -7.33950270 | -9.25383003  | 0.47989446  |

|   |              |             |             |
|---|--------------|-------------|-------------|
| H | -7.08973268  | -6.79760483 | 0.88792363  |
| H | -6.01814865  | -6.69733770 | -0.53052219 |
| H | -7.83828015  | -7.52374973 | -1.98486957 |
| H | -8.93522241  | -7.56628733 | -0.58815530 |
| H | -8.66084993  | -5.13492687 | -0.26660425 |
| H | -7.47854312  | -5.06963951 | -1.58727024 |
| H | -9.26291436  | -5.88209400 | -3.16425280 |
| H | -10.42960600 | -5.82051010 | -1.83142706 |
| H | -10.54237727 | -3.76474389 | -3.21917154 |
| H | -8.82684876  | -3.44330815 | -2.90231895 |
| H | -10.00638458 | -3.37961371 | -1.57025035 |
| H | -1.73071158  | -5.99081447 | 4.94620502  |
| H | -2.27104892  | -5.35495403 | 3.35892322  |
| H | -4.42793212  | -6.49390921 | 3.59467275  |
| H | -3.93605177  | -7.18731588 | 5.15281087  |
| H | -3.82599751  | -4.99252767 | 6.18786817  |
| H | -4.01706100  | -4.19291540 | 4.62103494  |
| H | -6.30918730  | -5.09751391 | 4.40338037  |
| H | -6.14783385  | -5.91197770 | 5.97187114  |
| H | -5.91728677  | -3.77755413 | 7.12839702  |
| H | -5.83047858  | -2.89780024 | 5.59341723  |
| H | -8.14389668  | -3.55989424 | 5.04332431  |
| H | -8.25625037  | -4.48055873 | 6.55686225  |
| H | -7.95202330  | -2.42275473 | 7.87575098  |
| H | -7.70976220  | -1.47447185 | 6.39885030  |
| H | -10.01864086 | -1.21473648 | 7.23723184  |
| H | -10.26813370 | -2.97098610 | 7.14589691  |
| H | -10.02274495 | -2.02634875 | 5.65860742  |
| F | 14.56221779  | -3.28768056 | 0.52866483  |
| F | 14.31541417  | 0.71137254  | 0.24898321  |
| F | 14.06554255  | 4.90284822  | -0.06170068 |

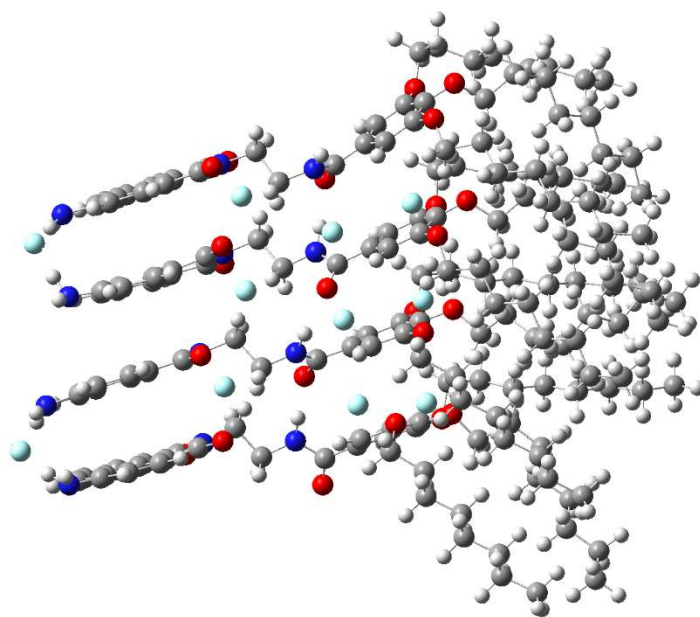

Energy = -10695.32654Hartrees

|   |            |             |              |
|---|------------|-------------|--------------|
| C | 1.34100000 | -2.96900000 | -12.12300000 |
|---|------------|-------------|--------------|



|   |              |             |              |
|---|--------------|-------------|--------------|
| C | 1.99400000   | -3.94600000 | -12.85300000 |
| C | 2.74100000   | -4.98000000 | -12.21200000 |
| C | 2.82100000   | -4.96500000 | -10.80000000 |
| C | 2.19300000   | -3.92700000 | -10.06300000 |
| C | 1.44600000   | -2.95900000 | -10.73100000 |
| C | 3.42100000   | -5.99700000 | -12.92500000 |
| C | 4.12200000   | -6.97900000 | -12.26000000 |
| C | 4.18100000   | -6.97500000 | -10.85700000 |
| C | 3.54800000   | -5.97900000 | -10.12500000 |
| C | 3.63100000   | -5.94200000 | -8.67000000  |
| N | 3.13900000   | -4.83900000 | -7.97600000  |
| C | 2.36300000   | -3.87600000 | -8.62600000  |
| O | 1.85700000   | -2.99800000 | -7.92900000  |
| O | 4.11600000   | -6.85100000 | -8.00300000  |
| N | 1.94400000   | -3.87500000 | -14.22000000 |
| C | 3.44300000   | -4.68000000 | -6.53000000  |
| C | 2.26100000   | -5.30100000 | -5.76400000  |
| N | 2.25700000   | -4.67500000 | -4.44300000  |
| C | 1.46500000   | -5.11500000 | -3.42800000  |
| C | 1.15400000   | -4.19300000 | -2.34200000  |
| O | 1.03400000   | -6.26000000 | -3.48900000  |
| C | 1.41800000   | -4.55200000 | -1.01300000  |
| C | 1.09000000   | -3.68200000 | 0.02000000   |
| C | 0.44500000   | -2.46700000 | -0.24700000  |
| C | 0.20700000   | -2.09800000 | -1.57400000  |
| C | 0.56900000   | -2.94600000 | -2.61800000  |
| O | -0.39300000  | -0.88800000 | -1.85500000  |
| O | 0.00000000   | -1.66000000 | 0.78100000   |
| O | 1.43000000   | -4.04100000 | 1.30300000   |
| C | 2.55400000   | -3.33200000 | 1.87700000   |
| C | 2.65100000   | -3.79500000 | 3.33400000   |
| C | 1.54600000   | -3.17400000 | 4.20000000   |
| C | 1.67300000   | -3.62200000 | 5.66000000   |
| C | 0.63600000   | -2.89700000 | 6.52700000   |
| C | 0.76100000   | -3.33200000 | 7.99300000   |
| C | -0.21300000  | -2.54300000 | 8.87700000   |
| C | -0.04200000  | -2.93400000 | 10.34800000  |
| C | -1.09100000  | -2.17800000 | 1.57200000   |
| C | -1.34200000  | -1.12000000 | 2.64600000   |
| C | -2.50000000  | -1.47700000 | 3.58800000   |
| C | -3.86500000  | -1.40000000 | 2.88700000   |
| C | -4.99800000  | -1.69300000 | 3.87800000   |
| C | -6.36200000  | -1.55200000 | 3.19000000   |
| C | -7.49500000  | -1.86300000 | 4.17500000   |
| C | -8.85800000  | -1.69100000 | 3.49900000   |
| C | -1.64900000  | -0.80100000 | -2.56600000  |
| C | -2.73100000  | -1.05200000 | -1.51000000  |
| C | -4.12400000  | -0.66300000 | -2.02000000  |
| C | -5.17200000  | -0.82700000 | -0.91000000  |
| C | -6.54200000  | -0.33800000 | -1.39700000  |
| C | -7.59600000  | -0.45200000 | -0.28900000  |
| C | -8.94600000  | 0.08300000  | -0.78500000  |
| C | -10.00400000 | 0.00700000  | 0.31900000   |
| H | 3.40500000   | -5.98500000 | -13.98800000 |
| H | 1.73100000   | -2.95200000 | -14.60800000 |
| H | 2.84000000   | -4.22300000 | -14.70500000 |

|   |             |             |              |
|---|-------------|-------------|--------------|
| H | 0.78500000  | -2.22000000 | -12.62400000 |
| H | 0.96300000  | -2.19200000 | -10.18100000 |
| H | 4.63100000  | -7.72900000 | -12.80900000 |
| H | 4.73000000  | -7.73300000 | -10.35800000 |
| H | 4.35200000  | -5.20100000 | -6.25800000  |
| H | 3.51900000  | -3.63000000 | -6.29000000  |
| H | 1.31900000  | -5.07300000 | -6.26600000  |
| H | 2.38700000  | -6.38400000 | -5.69400000  |
| H | 2.65100000  | -3.71500000 | -4.35500000  |
| H | 1.87300000  | -5.48300000 | -0.79600000  |
| H | 0.39800000  | -2.65400000 | -3.62100000  |
| H | 3.46600000  | -3.59500000 | 1.34000000   |
| H | 2.40000000  | -2.25200000 | 1.82900000   |
| H | 2.58800000  | -4.88400000 | 3.37000000   |
| H | 3.62200000  | -3.49000000 | 3.72400000   |
| H | 1.62200000  | -2.08800000 | 4.14800000   |
| H | 0.57100000  | -3.48000000 | 3.81700000   |
| H | 1.51600000  | -4.70100000 | 5.72400000   |
| H | 2.67500000  | -3.39100000 | 6.02500000   |
| H | 0.80000000  | -1.82100000 | 6.45400000   |
| H | -0.36800000 | -3.12600000 | 6.16500000   |
| H | 0.54200000  | -4.39800000 | 8.07400000   |
| H | 1.78200000  | -3.16200000 | 8.33700000   |
| H | -0.02400000 | -1.47400000 | 8.77100000   |
| H | -1.23900000 | -2.74900000 | 8.56600000   |
| H | -0.74400000 | -2.36800000 | 10.96100000  |
| H | 0.97400000  | -2.71200000 | 10.67800000  |
| H | -0.23800000 | -4.00000000 | 10.47700000  |
| H | -1.97200000 | -2.31000000 | 0.94700000   |
| H | -0.82000000 | -3.12800000 | 2.03200000   |
| H | -0.43200000 | -1.01900000 | 3.23500000   |
| H | -1.54700000 | -0.16600000 | 2.16200000   |
| H | -2.34600000 | -2.48000000 | 3.99100000   |
| H | -2.49400000 | -0.77200000 | 4.42200000   |
| H | -3.91000000 | -2.12400000 | 2.07200000   |
| H | -4.00100000 | -0.39800000 | 2.47600000   |
| H | -4.88800000 | -2.70900000 | 4.26300000   |
| H | -4.94200000 | -0.99200000 | 4.71300000   |
| H | -6.47600000 | -0.53100000 | 2.82300000   |
| H | -6.41700000 | -2.24000000 | 2.34400000   |
| H | -7.39800000 | -2.89100000 | 4.53100000   |
| H | -7.43300000 | -1.18800000 | 5.03100000   |
| H | -9.65100000 | -1.93600000 | 4.20700000   |
| H | -8.93500000 | -2.35600000 | 2.63700000   |
| H | -8.98300000 | -0.65900000 | 3.17200000   |
| H | -1.75500000 | 0.20100000  | -2.98100000  |
| H | -1.70800000 | -1.54300000 | -3.36300000  |
| H | -2.72100000 | -2.10800000 | -1.23600000  |
| H | -2.49900000 | -0.46000000 | -0.62400000  |
| H | -4.10900000 | 0.37800000  | -2.34600000  |
| H | -4.39200000 | -1.29400000 | -2.87000000  |
| H | -5.24000000 | -1.87800000 | -0.62100000  |
| H | -4.87500000 | -0.24300000 | -0.03800000  |
| H | -6.46200000 | 0.70600000  | -1.70700000  |
| H | -6.85600000 | -0.93500000 | -2.25600000  |
| H | -7.70500000 | -1.49700000 | 0.00700000   |

|   |              |             |              |
|---|--------------|-------------|--------------|
| H | -7.27600000  | 0.12700000  | 0.57800000   |
| H | -8.83500000  | 1.12300000  | -1.09900000  |
| H | -9.27900000  | -0.50600000 | -1.64200000  |
| H | -10.95600000 | 0.37800000  | -0.06100000  |
| H | -9.70000000  | 0.62000000  | 1.16900000   |
| H | -10.13200000 | -1.02700000 | 0.64400000   |
| F | 4.17300000   | -4.22200000 | -15.38100000 |
| C | 3.71200000   | -0.13700000 | -13.03800000 |
| C | 4.32700000   | -1.34600000 | -13.31500000 |
| C | 4.89700000   | -2.13700000 | -12.27100000 |
| C | 4.78600000   | -1.66900000 | -10.93700000 |
| C | 4.11200000   | -0.45000000 | -10.66100000 |
| C | 3.59900000   | 0.30200000  | -11.71600000 |
| C | 5.58000000   | -3.35300000 | -12.51300000 |
| C | 6.14800000   | -4.06200000 | -11.47800000 |
| C | 6.04200000   | -3.59400000 | -10.15900000 |
| C | 5.36200000   | -2.41600000 | -9.87800000  |
| C | 5.23500000   | -1.92900000 | -8.50900000  |
| N | 4.57700000   | -0.72600000 | -8.24500000  |
| C | 3.98000000   | -0.00500000 | -9.28400000  |
| O | 3.35600000   | 1.00300000  | -8.95700000  |
| O | 5.68700000   | -2.53600000 | -7.54400000  |
| N | 4.37700000   | -1.76600000 | -14.62600000 |
| C | 4.55200000   | -0.17600000 | -6.85500000  |
| C | 3.18400000   | -0.48800000 | -6.22500000  |
| N | 3.26600000   | -0.08400000 | -4.80400000  |
| C | 3.32800000   | -0.97000000 | -3.76100000  |
| C | 3.23300000   | -0.47100000 | -2.38900000  |
| O | 3.46100000   | -2.15600000 | -4.03600000  |
| C | 3.97700000   | -1.06800000 | -1.35900000  |
| C | 3.90300000   | -0.56700000 | -0.06300000  |
| C | 3.06600000   | 0.51400000  | 0.23800000   |
| C | 2.30300000   | 1.09300000  | -0.78400000  |
| C | 2.39000000   | 0.60900000  | -2.08600000  |
| O | 1.47800000   | 2.16800000  | -0.50000000  |
| O | 2.99800000   | 0.99800000  | 1.53500000   |
| O | 4.67100000   | -1.17200000 | 0.91000000   |
| C | 5.75600000   | -0.40800000 | 1.48600000   |
| C | 6.02500000   | -1.01600000 | 2.86600000   |
| C | 4.95300000   | -0.59700000 | 3.88400000   |
| C | 5.26500000   | -1.18800000 | 5.26400000   |
| C | 4.27300000   | -0.68400000 | 6.31900000   |
| C | 4.57900000   | -1.34100000 | 7.67200000   |
| C | 3.67300000   | -0.77700000 | 8.77100000   |
| C | 3.95700000   | -1.45600000 | 10.11400000  |
| C | 1.78200000   | 0.79300000  | 2.27900000   |
| C | 1.54000000   | 2.11100000  | 3.02100000   |
| C | 0.17500000   | 2.14400000  | 3.73100000   |
| C | 0.11100000   | 1.32400000  | 5.03000000   |
| C | 0.78400000   | 2.06200000  | 6.19400000   |
| C | 0.55400000   | 1.33000000  | 7.51900000   |
| C | 1.18100000   | 2.11300000  | 8.67800000   |
| C | 0.88900000   | 1.43400000  | 10.02000000  |
| C | 0.19800000   | 2.42200000  | -1.12700000  |
| C | -0.82000000  | 2.15700000  | -0.02100000  |
| C | -2.22800000  | 2.64000000  | -0.38600000  |

|   |             |             |              |
|---|-------------|-------------|--------------|
| C | -3.17300000 | 2.37600000  | 0.79300000   |
| C | -4.58600000 | 2.89100000  | 0.49800000   |
| C | -5.51100000 | 2.59600000  | 1.68500000   |
| C | -6.93000000 | 3.10700000  | 1.41000000   |
| C | -7.85400000 | 2.77500000  | 2.58600000   |
| H | 5.65100000  | -3.72000000 | -13.50900000 |
| H | 3.82700000  | -1.26900000 | -15.33100000 |
| H | 4.42900000  | -2.82300000 | -14.83200000 |
| H | 3.32900000  | 0.45500000  | -13.83000000 |
| H | 3.12000000  | 1.22900000  | -11.52000000 |
| H | 6.66900000  | -4.96500000 | -11.67700000 |
| H | 6.49600000  | -4.14800000 | -9.37600000  |
| H | 5.31300000  | -0.64400000 | -6.24600000  |
| H | 4.67300000  | 0.89900000  | -6.88600000  |
| H | 2.39900000  | 0.07200000  | -6.73600000  |
| H | 2.97400000  | -1.55100000 | -6.31500000  |
| H | 3.37700000  | 0.92400000  | -4.56600000  |
| H | 4.60300000  | -1.89600000 | -1.56900000  |
| H | 1.83100000  | 1.06400000  | -2.85900000  |
| H | 6.64100000  | -0.49800000 | 0.85600000   |
| H | 5.48300000  | 0.64000000  | 1.59200000   |
| H | 6.06100000  | -2.10300000 | 2.78200000   |
| H | 6.99500000  | -0.65800000 | 3.21200000   |
| H | 4.92600000  | 0.49200000  | 3.94800000   |
| H | 3.97700000  | -0.95000000 | 3.54800000   |
| H | 5.21700000  | -2.27600000 | 5.20800000   |
| H | 6.27400000  | -0.89800000 | 5.56100000   |
| H | 4.35800000  | 0.40000000  | 6.40900000   |
| H | 3.25400000  | -0.93000000 | 6.01500000   |
| H | 4.42500000  | -2.41900000 | 7.59300000   |
| H | 5.62100000  | -1.15800000 | 7.93800000   |
| H | 3.84200000  | 0.29600000  | 8.86900000   |
| H | 2.63100000  | -0.94500000 | 8.50100000   |
| H | 3.30200000  | -1.03900000 | 10.88000000  |
| H | 4.99400000  | -1.28900000 | 10.40700000  |
| H | 3.77400000  | -2.52900000 | 10.03700000  |
| H | 1.90600000  | -0.03100000 | 2.97900000   |
| H | 0.95400000  | 0.58200000  | 1.60300000   |
| H | 2.34800000  | 2.27900000  | 3.73200000   |
| H | 1.56500000  | 2.91300000  | 2.28500000   |
| H | -0.08300000 | 3.18000000  | 3.95300000   |
| H | -0.58600000 | 1.77100000  | 3.04600000   |
| H | -0.94000000 | 1.16700000  | 5.28000000   |
| H | 0.57900000  | 0.34900000  | 4.89200000   |
| H | 1.85600000  | 2.15400000  | 6.00900000   |
| H | 0.35000000  | 3.05700000  | 6.27000000   |
| H | -0.51900000 | 1.22500000  | 7.69400000   |
| H | 1.00100000  | 0.33800000  | 7.46400000   |
| H | 2.26000000  | 2.17600000  | 8.53100000   |
| H | 0.77300000  | 3.12600000  | 8.70100000   |
| H | 1.36200000  | 1.99700000  | 10.82600000  |
| H | 1.28100000  | 0.41700000  | 10.02300000  |
| H | -0.18700000 | 1.40200000  | 10.19500000  |
| H | 0.14800000  | 3.46200000  | -1.44900000  |
| H | 0.01100000  | 1.75700000  | -1.96900000  |
| H | -0.83500000 | 1.08600000  | 0.18200000   |

|   |             |             |              |
|---|-------------|-------------|--------------|
| H | -0.49500000 | 2.67500000  | 0.87800000   |
| H | -2.20400000 | 3.71100000  | -0.59800000  |
| H | -2.58400000 | 2.11000000  | -1.27000000  |
| H | -3.21300000 | 1.30400000  | 0.98500000   |
| H | -2.79000000 | 2.87400000  | 1.68500000   |
| H | -4.55300000 | 3.96800000  | 0.32300000   |
| H | -4.97400000 | 2.40000000  | -0.39600000  |
| H | -5.54300000 | 1.52000000  | 1.85700000   |
| H | -5.12000000 | 3.08100000  | 2.58100000   |
| H | -6.90700000 | 4.18900000  | 1.26400000   |
| H | -7.32000000 | 2.64100000  | 0.50400000   |
| H | -8.86000000 | 3.13600000  | 2.37200000   |
| H | -7.49000000 | 3.25700000  | 3.49400000   |
| H | -7.89000000 | 1.69600000  | 2.74000000   |
| C | 6.99100000  | 1.30900000  | -10.95200000 |
| C | 7.75200000  | 0.20000000  | -11.27800000 |
| C | 8.31800000  | -0.63500000 | -10.26900000 |
| C | 8.16200000  | -0.24600000 | -8.91900000  |
| C | 7.49600000  | 0.96600000  | -8.60500000  |
| C | 6.87600000  | 1.69600000  | -9.61600000  |
| C | 9.00500000  | -1.83800000 | -10.56000000 |
| C | 9.48300000  | -2.64000000 | -9.54700000  |
| C | 9.30700000  | -2.26200000 | -8.20700000  |
| C | 8.66800000  | -1.07200000 | -7.88300000  |
| C | 8.50800000  | -0.64700000 | -6.49700000  |
| N | 7.99400000  | 0.62100000  | -6.21100000  |
| C | 7.50000000  | 1.43500000  | -7.23600000  |
| O | 7.09100000  | 2.54900000  | -6.91400000  |
| O | 8.81900000  | -1.34700000 | -5.53800000  |
| N | 7.99500000  | -0.05800000 | -12.59900000 |
| C | 7.98500000  | 1.12300000  | -4.80800000  |
| C | 6.53400000  | 0.99900000  | -4.31700000  |
| N | 6.41400000  | 1.79500000  | -3.09700000  |
| C | 5.25100000  | 2.40900000  | -2.72800000  |
| C | 5.20500000  | 3.08700000  | -1.43200000  |
| O | 4.30100000  | 2.35500000  | -3.51000000  |
| C | 6.00600000  | 2.64800000  | -0.36200000  |
| C | 5.95200000  | 3.29500000  | 0.86700000   |
| C | 5.12800000  | 4.40800000  | 1.04500000   |
| C | 4.28900000  | 4.81200000  | 0.00200000   |
| C | 4.33600000  | 4.17000000  | -1.23300000  |
| O | 3.36000000  | 5.81100000  | 0.20600000   |
| O | 5.13700000  | 5.09400000  | 2.23400000   |
| O | 6.68600000  | 2.77400000  | 1.91100000   |
| C | 7.90900000  | 3.40900000  | 2.31400000   |
| C | 8.48600000  | 2.52900000  | 3.42700000   |
| C | 7.68000000  | 2.61700000  | 4.73100000   |
| C | 8.28300000  | 1.66800000  | 5.77400000   |
| C | 7.54100000  | 1.76700000  | 7.11200000   |
| C | 8.10700000  | 0.74300000  | 8.10400000   |
| C | 7.41400000  | 0.85400000  | 9.46800000   |
| C | 7.92000000  | -0.23400000 | 10.41900000  |
| C | 4.18800000  | 4.71300000  | 3.24200000   |
| C | 4.25500000  | 5.86400000  | 4.24300000   |
| C | 3.36200000  | 5.70200000  | 5.47900000   |
| C | 1.86800000  | 5.80800000  | 5.14600000   |

|   |             |             |              |
|---|-------------|-------------|--------------|
| C | 1.05400000  | 5.86600000  | 6.44500000   |
| C | -0.44900000 | 5.93300000  | 6.14800000   |
| C | -1.25600000 | 5.85000000  | 7.44900000   |
| C | -2.75400000 | 6.00100000  | 7.16600000   |
| C | 1.99000000  | 5.35400000  | 0.17700000   |
| C | 1.20400000  | 6.27400000  | 1.11100000   |
| C | -0.20100000 | 5.69800000  | 1.32400000   |
| C | -1.05300000 | 6.59000000  | 2.23100000   |
| C | -2.41300000 | 5.92300000  | 2.47300000   |
| C | -3.32300000 | 6.81800000  | 3.32200000   |
| C | -4.66800000 | 6.12200000  | 3.56600000   |
| C | -5.59200000 | 7.01100000  | 4.40300000   |
| H | 9.14500000  | -2.12000000 | -11.57500000 |
| H | 7.53900000  | 0.55900000  | -13.27800000 |
| H | 9.04500000  | -0.08500000 | -12.84000000 |
| H | 6.53900000  | 1.88200000  | -11.71900000 |
| H | 6.33000000  | 2.57500000  | -9.37800000  |
| H | 9.98400000  | -3.54900000 | -9.77700000  |
| H | 9.67400000  | -2.89600000 | -7.43900000  |
| H | 8.62600000  | 0.53900000  | -4.16200000  |
| H | 8.27600000  | 2.16200000  | -4.79600000  |
| H | 5.85900000  | 1.39800000  | -5.07200000  |
| H | 6.29200000  | -0.04900000 | -4.12400000  |
| H | 7.28000000  | 2.14600000  | -2.64300000  |
| H | 6.64100000  | 1.81000000  | -0.47800000  |
| H | 3.70600000  | 4.49000000  | -2.02100000  |
| H | 8.60100000  | 3.42000000  | 1.47600000   |
| H | 7.72200000  | 4.42200000  | 2.67300000   |
| H | 8.51200000  | 1.49600000  | 3.07700000   |
| H | 9.51100000  | 2.85000000  | 3.61800000   |
| H | 7.70600000  | 3.64100000  | 5.10500000   |
| H | 6.64200000  | 2.33500000  | 4.54000000   |
| H | 8.22100000  | 0.64400000  | 5.40200000   |
| H | 9.33400000  | 1.91800000  | 5.93000000   |
| H | 7.66000000  | 2.77300000  | 7.51600000   |
| H | 6.47800000  | 1.57200000  | 6.95700000   |
| H | 7.96100000  | -0.26200000 | 7.70400000   |
| H | 9.17800000  | 0.91300000  | 8.23100000   |
| H | 7.62000000  | 1.83100000  | 9.90500000   |
| H | 6.33600000  | 0.74700000  | 9.34300000   |
| H | 7.42000000  | -0.13700000 | 11.38400000  |
| H | 8.99600000  | -0.13200000 | 10.56700000  |
| H | 7.70500000  | -1.22100000 | 10.00700000  |
| H | 3.19000000  | 4.62900000  | 2.81400000   |
| H | 4.48900000  | 3.77200000  | 3.70500000   |
| H | 5.28500000  | 5.94800000  | 4.57300000   |
| H | 3.99500000  | 6.78700000  | 3.72900000   |
| H | 3.56700000  | 4.74300000  | 5.95800000   |
| H | 3.61800000  | 6.49900000  | 6.17900000   |
| H | 1.56100000  | 4.94400000  | 4.55600000   |
| H | 1.68500000  | 6.71600000  | 4.57100000   |
| H | 1.27400000  | 4.98600000  | 7.05000000   |
| H | 1.34300000  | 6.75200000  | 7.01400000   |
| H | -0.67000000 | 6.87300000  | 5.64300000   |
| H | -0.73600000 | 5.10800000  | 5.49300000   |
| H | -1.07700000 | 4.88500000  | 7.92700000   |

|   |             |            |              |
|---|-------------|------------|--------------|
| H | -0.94000000 | 6.64300000 | 8.13000000   |
| H | -3.31300000 | 5.89900000 | 8.09700000   |
| H | -3.08500000 | 5.23100000 | 6.46800000   |
| H | -2.95400000 | 6.98500000 | 6.74200000   |
| H | 1.59300000  | 5.40100000 | -0.83800000  |
| H | 1.93900000  | 4.33200000 | 0.55100000   |
| H | 1.71600000  | 6.33000000 | 2.07100000   |
| H | 1.14400000  | 7.27100000 | 0.67300000   |
| H | -0.69800000 | 5.58700000 | 0.35900000   |
| H | -0.10900000 | 4.71600000 | 1.79000000   |
| H | -0.54600000 | 6.73200000 | 3.18600000   |
| H | -1.19800000 | 7.56300000 | 1.75600000   |
| H | -2.89800000 | 5.72800000 | 1.51400000   |
| H | -2.26200000 | 4.97300000 | 2.98900000   |
| H | -2.84100000 | 7.02300000 | 4.27800000   |
| H | -3.49100000 | 7.76300000 | 2.80300000   |
| H | -5.14900000 | 5.90800000 | 2.60900000   |
| H | -4.50400000 | 5.18000000 | 4.09300000   |
| H | -6.54200000 | 6.50000000 | 4.56400000   |
| H | -5.77900000 | 7.95200000 | 3.88300000   |
| H | -5.13400000 | 7.22100000 | 5.37100000   |
| F | 10.41600000 | 0.43200000 | -13.20700000 |
| C | 8.86400000  | 4.55600000 | -11.32500000 |
| C | 9.62400000  | 3.40100000 | -11.39900000 |
| C | 10.14500000 | 2.78600000 | -10.21800000 |
| C | 9.89700000  | 3.41400000 | -8.97100000  |
| C | 9.13700000  | 4.61200000 | -8.91000000  |
| C | 8.62100000  | 5.15500000 | -10.08600000 |
| C | 10.88100000 | 1.57600000 | -10.23900000 |
| C | 11.35200000 | 1.01600000 | -9.07400000  |
| C | 11.11700000 | 1.64600000 | -7.84300000  |
| C | 10.40400000 | 2.83600000 | -7.77900000  |
| C | 10.15600000 | 3.49500000 | -6.50300000  |
| N | 9.43200000  | 4.69000000 | -6.45300000  |
| C | 8.92200000  | 5.25800000 | -7.62500000  |
| O | 8.31900000  | 6.32500000 | -7.50200000  |
| O | 10.56300000 | 3.03900000 | -5.43800000  |
| N | 9.87100000  | 2.87300000 | -12.64600000 |
| C | 9.22200000  | 5.38300000 | -5.14900000  |
| C | 7.76500000  | 5.13600000 | -4.70000000  |
| N | 7.66100000  | 5.70800000 | -3.34400000  |
| C | 8.07300000  | 5.03400000 | -2.22400000  |
| C | 8.25100000  | 5.77300000 | -0.97400000  |
| O | 8.31500000  | 3.83500000 | -2.33400000  |
| C | 9.25900000  | 5.37200000 | -0.08400000  |
| C | 9.45400000  | 6.04600000 | 1.11500000   |
| C | 8.65600000  | 7.15000000 | 1.44300000   |
| C | 7.65400000  | 7.55500000 | 0.55800000   |
| C | 7.44300000  | 6.87400000 | -0.64000000  |
| O | 6.86100000  | 8.63300000 | 0.89100000   |
| O | 8.80500000  | 7.81700000 | 2.64100000   |
| O | 10.41300000 | 5.53400000 | 1.96500000   |
| C | 11.52100000 | 6.31900000 | 2.46600000   |
| C | 12.15600000 | 5.46700000 | 3.57500000   |
| C | 11.23400000 | 5.37400000 | 4.80100000   |
| C | 11.81800000 | 4.50400000 | 5.91900000   |

|   |             |            |              |
|---|-------------|------------|--------------|
| C | 10.87100000 | 4.52800000 | 7.12800000   |
| C | 11.34500000 | 3.57400000 | 8.23000000   |
| C | 10.40300000 | 3.65400000 | 9.43800000   |
| C | 10.83800000 | 2.67200000 | 10.53000000  |
| C | 8.19300000  | 7.21600000 | 3.79600000   |
| C | 8.38000000  | 8.22500000 | 4.93700000   |
| C | 8.31300000  | 7.60200000 | 6.34400000   |
| C | 7.07600000  | 6.72600000 | 6.57700000   |
| C | 7.05900000  | 6.14700000 | 7.99700000   |
| C | 5.84500000  | 5.22500000 | 8.17200000   |
| C | 5.85600000  | 4.55400000 | 9.55000000   |
| C | 4.69700000  | 3.55900000 | 9.66800000   |
| C | 5.42600000  | 8.51100000 | 0.85400000   |
| C | 4.93400000  | 9.24700000 | 2.10300000   |
| C | 3.40100000  | 9.22700000 | 2.15700000   |
| C | 2.87300000  | 9.68800000 | 3.52200000   |
| C | 1.33900000  | 9.64000000 | 3.53800000   |
| C | 0.79500000  | 9.87500000 | 4.95200000   |
| C | -0.73900000 | 9.85700000 | 4.94700000   |
| C | -1.28500000 | 9.97400000 | 6.37200000   |
| H | 11.05900000 | 1.08900000 | -11.16700000 |
| H | 9.24500000  | 3.11600000 | -13.41800000 |
| H | 10.18700000 | 1.84500000 | -12.73300000 |
| H | 8.47300000  | 4.98500000 | -12.21100000 |
| H | 8.04000000  | 6.04100000 | -10.04400000 |
| H | 11.89000000 | 0.10200000 | -9.10900000  |
| H | 11.49000000 | 1.20100000 | -6.95400000  |
| H | 9.88500000  | 4.98900000 | -4.39000000  |
| H | 9.36800000  | 6.44700000 | -5.27500000  |
| H | 7.07000000  | 5.63200000 | -5.37900000  |
| H | 7.53800000  | 4.07100000 | -4.69000000  |
| H | 7.53600000  | 6.72700000 | -3.27000000  |
| H | 9.87100000  | 4.54000000 | -0.32100000  |
| H | 6.66500000  | 7.18300000 | -1.28700000  |
| H | 12.24000000 | 6.48900000 | 1.66400000   |
| H | 11.18500000 | 7.27500000 | 2.86700000   |
| H | 12.36000000 | 4.46800000 | 3.18700000   |
| H | 13.09900000 | 5.92700000 | 3.87300000   |
| H | 11.05800000 | 6.38100000 | 5.18000000   |
| H | 10.28300000 | 4.93800000 | 4.49700000   |
| H | 11.93000000 | 3.48000000 | 5.55900000   |
| H | 12.79700000 | 4.88800000 | 6.21500000   |
| H | 10.82900000 | 5.54200000 | 7.52800000   |
| H | 9.86800000  | 4.23500000 | 6.81000000   |
| H | 11.35600000 | 2.55300000 | 7.84400000   |
| H | 12.35600000 | 3.84600000 | 8.53900000   |
| H | 10.41300000 | 4.66800000 | 9.84300000   |
| H | 9.38600000  | 3.41400000 | 9.12600000   |
| H | 10.14800000 | 2.73400000 | 11.37300000  |
| H | 11.84300000 | 2.91800000 | 10.87500000  |
| H | 10.83000000 | 1.65300000 | 10.14200000  |
| H | 8.69000000  | 6.27700000 | 4.02700000   |
| H | 7.13300000  | 7.03900000 | 3.61200000   |
| H | 9.35600000  | 8.70200000 | 4.82800000   |
| H | 7.61900000  | 8.99900000 | 4.83900000   |
| H | 9.20400000  | 6.99500000 | 6.50000000   |



|   |             |             |              |
|---|-------------|-------------|--------------|
| H | 8.32600000  | 8.40800000  | 7.08000000   |
| H | 6.17400000  | 7.32000000  | 6.41400000   |
| H | 7.09300000  | 5.89300000  | 5.87500000   |
| H | 7.97400000  | 5.57600000  | 8.16400000   |
| H | 7.01100000  | 6.95900000  | 8.72600000   |
| H | 4.92900000  | 5.80900000  | 8.06800000   |
| H | 5.86100000  | 4.45600000  | 7.39700000   |
| H | 6.80000000  | 4.02600000  | 9.69200000   |
| H | 5.76300000  | 5.31500000  | 10.32800000  |
| H | 4.72200000  | 3.08400000  | 10.65000000  |
| H | 4.78700000  | 2.78900000  | 8.90200000   |
| H | 3.74500000  | 4.07900000  | 9.55000000   |
| H | 5.02900000  | 8.97200000  | -0.05100000  |
| H | 5.13400000  | 7.46100000  | 0.90900000   |
| H | 5.34500000  | 8.74900000  | 2.98200000   |
| H | 5.28900000  | 10.27900000 | 2.08500000   |
| H | 3.00300000  | 9.86900000  | 1.36900000   |
| H | 3.06200000  | 8.20800000  | 1.97600000   |
| H | 3.26500000  | 9.03100000  | 4.30000000   |
| H | 3.20900000  | 10.70800000 | 3.72200000   |
| H | 0.94800000  | 10.40300000 | 2.86200000   |
| H | 1.00400000  | 8.66300000  | 3.18900000   |
| H | 1.16500000  | 9.09000000  | 5.61500000   |
| H | 1.14600000  | 10.84100000 | 5.32300000   |
| H | -1.11100000 | 10.69200000 | 4.34800000   |
| H | -1.09600000 | 8.92700000  | 4.50300000   |
| H | -2.37600000 | 9.95600000  | 6.34800000   |
| H | -0.95600000 | 10.91100000 | 6.82300000   |
| H | -0.93200000 | 9.13900000  | 6.97900000   |
| H | 4.91900000  | -3.86100000 | -16.00900000 |
| H | 9.52100000  | 0.58300000  | -12.69900000 |
| F | 0.76624600  | -0.79668100 | -3.02748000  |
| F | 5.33460000  | 4.59245000  | -3.27227000  |
| F | 3.21183000  | 1.58658000  | -3.09681000  |
| F | 5.53414000  | 1.49607000  | -6.32415000  |
| F | 3.20099000  | -1.29047000 | -7.64330000  |
| F | 8.18856000  | 4.06544000  | -5.93417000  |
| F | 4.15041000  | 7.26088000  | -0.81002600  |
| F | 2.07880000  | 3.51861000  | -0.50707200  |
| F | 0.01121590  | -0.52637500 | -0.47066300  |

## References

1. M. R. Molla, A. Das and S. Ghosh, *Chem. Eur. J.* 2010, **16**, 10084-10093.
2. M. Muthukkumar, T. Bhuvaneshwari, G. Venkatesh, C. Kamal, P. Vennila, S. J. Armaković, Y. S. Mary and C. Y. Panicker, *J. Mol. Liq.* 2018, **272**, 481–495.
3. G. Venkatesh, M. Govindaraju, C. Kamal, P. Vennila and S. Kaya, *RSC Adv.* 2017, **7**, 1401–1412.
4. Gaussian 09, Revision D.01; Gaussian, Inc.: Wallingford, CT, **2009**.
5. GaussView, Version 5; Gaussian, Inc.: Wallingford, CT, **2009**.
6. J. Contreras-García, E. R. Johnson, S. Keinan, R. Chaudret, J. P. Piquemal, D. N. Beratan, W. Yang, *J. Chem. Theory Comput.* 2011, **7**, 625–632.
